# Supplementary material
Source: publisher figshare collection journal article supplement (https://gsajournals.figshare.com/ndownloader/files/26536685)
Supplement: Supplementary file 1 [file 26536685]

## Sheet: all_mirna.exp_profile
ID	length	seq	total	FP-45d_count	FP-55d_count	FP-65d_count	FP-75d_count	FP-95d_count	FP-115d_count	FP-135d_count	FP-45d_TPM	FP-55d_TPM	FP-65d_TPM	FP-75d_TPM	FP-95d_TPM	FP-115d_TPM	FP-135d_TPM
chi-miR-199a-5p	23	CCCAGTGTTCAGACTACCTGTTC	2321050	95665	135247	80358	697324	635314	463931	213211	22882.5	21049	20221	82850.2	65592	58249.8	43523.4
chi-miR-424-5p	21	CAGCAGCAATTCATGTTTTGA	2212602	9686	11206	13647	654459	796245	577999	149360	2316.83	1744.03	3434.08	77757.4	82207.1	72571.9	30489.3
chi-miR-99a-5p	21	AACCCGTAGATCCGATCTTGT	1791275	390679	489493	322804	164547	183658	161348	78746	93448.1	76181.6	81229.2	19550.1	18961.5	20258.4	16074.7
chi-miR-199b-3p	21	ACAGTAGTCTGCACATTGGTT	1731738	144415	165993	118580	432536	406716	290451	173047	34543.2	25834.1	29839	51390.3	41990.8	36468.2	35324.6
chi-miR-199a-3p	21	ACAGTAGTCTGCACATTGGTT	1731738	144415	165993	118580	432536	406716	290451	173047	34543.2	25834.1	29839	51390.3	41990.8	36468.2	35324.6
chi-miR-199c-3p	21	ACAGTAGTCTGCACATTGGTT	1731738	144415	165993	118580	432536	406716	290451	173047	34543.2	25834.1	29839	51390.3	41990.8	36468.2	35324.6
chi-miR-21-5p	23	TAGCTTATCAGACTGATGTTGAC	1527514	74900	132747	124109	284351	359227	333838	218342	17915.6	20659.9	31230.3	33784.2	37087.8	41915.7	44570.8
chi-miR-143-3p	22	TGAGATGAAGCACTGTAGCTCG	1188268	163710	332860	217593	95205	119733	136724	122443	39158.4	51804.2	54754.3	11311.5	12361.7	17166.7	24994.7
chi-miR-26a-5p	22	TTCAAGTAATCCAGGATAGGCT	1159982	102089	173530	127284	193709	224975	187945	150450	24419.1	27007.1	32029.3	23014.9	23227.2	23597.8	30711.8
chi-let-7a-5p	22	TGAGGTAGTAGGTTGTATAGTT	1135215	10778	15803	12509	291662	347726	283706	173031	2578.03	2459.48	3147.72	34652.8	35900.4	35621.3	35321.4
chi-miR-10b-5p	22	TACCCTGTAGAACCGAATTTGT	1042075	201880	266709	307614	102946	81144	53928	27854	48288.5	41508.9	77406.9	12231.2	8377.59	6771.04	5685.93
chi-miR-125b-5p	20	TCCCTGAGACCCTAACTTGT	1031847	50620	45749	24325	278871	295210	200523	136549	12108	7120.09	6121.05	33133.1	30478.5	25177.1	27874.2
chi-let-7f-5p	22	TGAGGTAGTAGATTGTATAGTT	1031574	12758	40162	27033	255100	287958	256729	151834	3051.64	6250.56	6802.48	30308.9	29729.8	32234.1	30994.4
chi-miR-542-3p	20	TGTGACAGATTGATAACTGA	680234	38410	66524	37221	182823	198016	122384	34856	9187.44	10353.4	9366.16	21721.5	20443.9	15366.2	7115.27
chi-let-7i-5p	22	TGAGGTAGTAGTTTGTGCTGTT	646220	45271	124234	64021	137538	136025	92718	46413	10828.6	19335	16110	16341.1	14043.7	11641.4	9474.43
chi-miR-411a-5p	21	ATAGTAGACCGTATAGCGTAC	623173	109731	325455	108602	27611	31435	13742	6597	26247	50651.8	27328.2	3280.51	3245.46	1725.41	1346.67
chi-miR-27b-3p	21	TTCACAGTGGCTAAGTTCTGC	597258	50256	72754	66440	73715	108984	134693	90416	12020.9	11323	16718.7	8758.2	11251.9	16911.7	18456.9
chi-miR-148a-3p	22	TCAGTGCACTACAGAACTTTGT	593598	54045	114361	89435	78508	120744	93995	42510	12927.2	17798.4	22505.1	9327.67	12466	11801.7	8677.7
chi-let-7b-5p	22	TGAGGTAGTAGGTTGTGTGGTT	530864	2510	6162	5513	118518	180378	121806	95977	600.377	959.015	1387.27	14081.3	18622.9	15293.6	19592.1
chi-miR-136-5p	22	ACTCCATTTGTTTTGATGATGG	470699	4681	9822	3901	146187	192314	83473	30321	1119.67	1528.63	981.633	17368.7	19855.2	10480.6	6189.52
chi-miR-101-3p	20	TACAGTACTGTGATAACTGA	466706	34500	44977	20409	69144	118275	106501	72900	8252.19	6999.94	5135.65	8215.11	12211.1	13372	14881.3
chi-miR-127-3p	20	TCGGATCCGTCTGAGCTTGG	434769	21915	68686	21744	110025	135455	49762	27182	5241.94	10689.9	5471.58	13072.3	13984.8	6247.97	5548.75
chi-miR-199b-5p	23	CCCAGTGTTTAGACTATCTGTTC	426375	39921	53352	42717	99636	98787	65013	26949	9548.86	8303.37	10749.1	11837.9	10199.1	8162.84	5501.18
chi-miR-199c-5p	23	CCCAGTGTTTAGACTATCTGTTC	426375	39921	53352	42717	99636	98787	65013	26949	9548.86	8303.37	10749.1	11837.9	10199.1	8162.84	5501.18
chi-miR-100-5p	21	AACCCGTAGATCCGAACTTGT	409671	113301	143214	96671	23099	16401	11511	5474	27100.9	22288.9	24325.9	2744.43	1693.3	1445.29	1117.42
chi-let-7c-5p	22	TGAGGTAGTAGGTTGTATGGTT	401914	6661	6112	3726	112391	141204	85535	46285	1593.27	951.233	937.597	13353.4	14578.4	10739.5	9448.3
chi-let-7g-5p	22	TGAGGTAGTAGTTTGTACAGTT	379745	25863	57836	43227	71171	74468	72575	34605	6186.27	9001.23	10877.5	8455.94	7688.34	9112.3	7064.03
chi-miR-19b-3p	23	TGTGCAAATCCATGCAAAACTGA	350427	16446	18492	25168	86541	80959	86061	36760	3933.78	2877.98	6333.18	10282.1	8358.49	10805.6	7503.94
chi-miR-1	22	TGGAATGTAAAGAAGTATGTAT	350127	29063	168481	25888	33397	60282	6327	26689	6951.69	26221.3	6514.36	3967.95	6223.72	794.4	5448.11
chi-miR-30e-5p	24	TGTAAACATCCTTGACTGGAAGCT	304862	48212	58122	46146	42934	45692	36755	27001	11532	9045.74	11612	5101.06	4717.4	4614.85	5511.8
chi-miR-103-3p	23	AGCAGCATTGTACAGGGCTATGA	275607	12637	9213	13424	56912	65099	78349	39973	3022.69	1433.85	3377.97	6761.81	6721.05	9837.27	8159.81
chi-miR-379-5p	21	TGGTAGACTATGGAACGTAGG	270607	21924	41990	18562	64859	69809	39523	13940	5244.09	6535.06	4670.87	7706.01	7207.32	4962.39	2845.62
chi-miR-30a-5p	24	TGTAAACATCCTCGACTGGAAGCT	264533	42266	67854	38545	29098	38451	26624	21695	10109.8	10560.4	9699.32	3457.18	3969.81	3342.83	4428.67
chi-miR-195-5p	20	TAGCAGCACAGAAATGTTGG	231414	5	0	0	11122	62182	92912	65193	1.196	0.01	0.01	1321.42	6419.89	11665.8	13308.1
chi-miR-24-3p	20	TGGCTCAGTTCAGCAGGAAC	223469	19884	30726	22743	22389	37535	50460	39732	4756.13	4782	5722.97	2660.07	3875.24	6335.61	8110.62
chi-miR-374a-5p	21	TTATAATACAACCTGATAAGT	220646	68767	72816	45205	10802	8922	6714	7420	16448.7	11332.6	11375.2	1283.4	921.138	842.99	1514.67
chi-miR-10a-5p	22	TACCCTGTAGATCCGAATTTGT	215329	80031	40553	49520	17445	14459	6604	6717	19142.9	6311.41	12461	2072.67	1492.8	829.179	1371.16
chi-miR-26b-5p	22	TTCAAGTAATTCAGGATAGGTT	208202	10535	13986	7602	41336	55310	44395	35038	2519.91	2176.69	1912.94	4911.2	5710.4	5574.11	7152.42
chi-miR-409-5p	23	AGGTTACCCGAGCAACTTTGCAT	207496	43770	115511	42455	2158	2313	995	294	10469.5	17977.4	10683.2	256.396	238.802	124.929	60.0152
chi-miR-369-3p	21	AATAATACATGGTTGATCTTT	194296	30160	65295	22642	29115	31106	11076	4902	7214.09	10162.1	5697.55	3459.2	3211.49	1390.67	1000.66
chi-miR-378-3p	22	ACTGGACTTGGAGTCAGAAGGC	191416	6543	24700	10193	68398	45348	20900	15334	1565.05	3844.15	2564.93	8126.48	4681.89	2624.14	3130.18
chi-miR-16a-5p	22	TAGCAGCACGTAAATATTGGAG	189719	9330	10798	12140	38326	42346	44291	32488	2231.68	1680.53	3054.86	4553.58	4371.95	5561.05	6631.88
chi-miR-99b-5p	22	CACCCGTAGAACCGACCTTGCG	189364	68354	78455	28891	4181	3974	3195	2314	16349.9	12210.2	7270.03	496.752	410.29	401.155	472.364
chi-miR-200a	21	TAACACTGTCTGGTAACGATG	188970	2030	5013	8592	26509	45133	61521	40172	485.564	780.192	2162.06	3149.58	4659.69	7724.4	8200.44
chi-miR-206	23	TGGAATGTAAGGAAGTGTGTGGT	175593	28035	70688	8917	23060	38093	1053	5747	6705.8	11001.4	2243.84	2739.8	3932.85	132.212	1173.15
chi-miR-140-3p	22	ACCACAGGGTAGAACCACGGAC	171403	65201	68581	3259	10025	9823	8800	5714	15595.7	10673.5	820.083	1191.09	1014.16	1104.9	1166.42
chi-miR-136-3p	21	ATCATCGTCTCAAATGAGTCT	155399	29734	70321	26044	8784	13599	4650	2267	7112.19	10944.3	6553.62	1043.64	1404.01	583.84	462.77
chi-miR-126-3p	21	TCGTACCGTGAGTAATAATGC	153838	11674	19010	10104	20342	32491	33736	26481	2792.35	2958.6	2542.53	2416.87	3354.48	4235.79	5405.65
chi-miR-450-5p	20	TTTTGCGATGTGTTCCTAAT	146200	33551	60776	31017	7365	7575	4534	1382	8025.2	9458.8	7805	875.048	782.069	569.276	282.112
chi-miR-93-5p	23	CAAAGTGCTGTTCGTGCAGGTAG	141390	8860	6730	4446	23814	30155	39208	28177	2119.26	1047.42	1118.78	2829.38	3113.31	4922.84	5751.86
chi-miR-186-5p	22	CAAAGAATTCTCCTTTTGGGCT	138315	14386	26532	17803	21464	22105	21819	14206	3441.04	4129.27	4479.88	2550.17	2282.2	2739.53	2899.92
chi-miR-335-5p	21	TCAAGAGCAATAACGAAAAAT	137316	39695	64245	27125	2576	2028	1082	565	9494.81	9998.69	6825.64	306.059	209.378	135.853	115.335
chi-miR-125a-5p	22	TCCCTGAGACCCTTTAACCTGT	126477	17111	19844	10303	24415	23883	16839	14082	4092.85	3088.4	2592.61	2900.79	2465.76	2114.26	2874.6
chi-miR-200b	22	TAATACTGCCTGGTAATGATGA	123869	1417	3749	6847	16999	25708	42510	26639	338.938	583.471	1722.95	2019.68	2654.18	5337.43	5437.9
chi-miR-19a	23	TGTGCAAATCTATGCAAAACTGA	117086	3511	3280	3769	29424	28126	34560	14416	839.81	510.479	948.417	3495.91	2903.83	4339.25	2942.78
chi-miR-381	22	TATACAAGGGCAAGCTCTCTGT	116223	6977	42339	8414	14814	39541	1465	2673	1668.86	6589.38	2117.27	1760.08	4082.35	183.941	545.648
chi-miR-27a-3p	20	TTCACAGTGGCTAAGTTCCG	110024	15814	24091	21417	8942	13683	13769	12308	3782.61	3749.37	5389.3	1062.41	1412.68	1728.8	2512.47
chi-miR-181b-5p	23	AACATTCATTGCTGTCGGTGGGT	109784	3274	3087	2525	36540	28396	23146	12816	783.121	480.441	635.382	4341.38	2931.7	2906.14	2616.17
chi-miR-320-3p	22	AAAAGCTGGGTTGAGAGGGCGA	108941	4324	5139	4074	23511	28400	27108	16385	1034.27	799.802	1025.17	2793.38	2932.11	3403.6	3344.72
chi-miR-20a-5p	23	TAAAGTGCTTATAGTGCAGGTAG	108244	14937	11304	8621	11944	17205	25763	18470	3572.84	1759.28	2169.36	1419.09	1776.3	3234.73	3770.34
chi-let-7e-5p	22	TGAGGTAGGAGGTTGTATAGTT	106978	4557	4531	2241	32410	29875	22193	11171	1090.01	705.177	563.917	3850.69	3084.4	2786.49	2280.37
chi-miR-494	23	TGAAACATACACGGGAAACCTCT	106605	24087	51154	24374	2698	2542	1270	480	5761.47	7961.29	6133.38	320.554	262.445	159.458	97.9839
chi-miR-23a	21	ATCACATTGCCAGGGATTTCC	103665	9649	18427	19462	9426	13687	19643	13371	2307.98	2867.86	4897.35	1119.92	1413.09	2466.32	2729.46
chi-miR-92a-3p	22	TATTGCACTTGTCCCGGCCTGT	103487	15165	15716	7131	20190	17289	15963	12033	3627.38	2445.94	1794.42	2398.81	1784.98	2004.27	2456.33
chi-miR-25-3p	22	CATTGCACTTGTCTCGGTCTGA	94136	8505	10282	6382	21507	18676	14980	13804	2034.34	1600.23	1605.94	2555.28	1928.18	1880.84	2817.85
chi-miR-92b	22	TATTGCACTTGTCCCGGCCTGT	91536	13599	14065	6373	17448	14944	14217	10890	3252.8	2188.99	1603.68	2073.03	1542.87	1785.04	2223.01
chi-miR-200c	23	TAATACTGCCGGGTAATGATGGA	89714	431	1436	2597	13822	21990	25929	23509	103.093	223.49	653.5	1642.21	2270.32	3255.57	4798.97
chi-miR-16b-5p	22	TAGCAGCACGTAAATATTGGGG	87726	3950	4203	4724	24424	19485	18228	12712	944.816	654.129	1188.73	2901.86	2011.7	2288.65	2594.94
chi-miR-3431-5p	22	CCTCAGTCAGCCTTGTGGATGT	86744	3411	6698	3449	34740	18931	12758	6757	815.891	1042.43	867.894	4127.52	1954.5	1601.86	1379.33
chi-miR-141	22	TAACACTGTCTGGTAAAGATGG	86142	916	2502	6228	12308	20921	24994	18273	219.102	389.396	1567.19	1462.33	2159.96	3138.17	3730.13
chi-miR-133a-3p	23	TTTGGTCCCCTTCAACCAGCTGT	84078	14605	48529	8577	4000	6003	370	1994	3493.43	7552.75	2158.28	475.247	619.771	46.4561	407.041
chi-miR-542-5p	23	TCGGGGATCATCATGTCACGAGA	79380	1710	2508	1356	24039	27483	17137	5147	409.022	390.329	341.219	2856.11	2837.44	2151.67	1050.67
chi-miR-145-5p	23	GTCCAGTTTTCCCAGGAATCCCT	75438	3560	8655	10187	9517	12332	14333	16854	851.531	1347.01	2563.42	1130.73	1273.2	1799.61	3440.46
chi-miR-532-5p	22	CATGCCTTGAGTGTAGGACCGT	74507	10874	19245	5174	12600	14620	7433	4561	2601	2995.17	1301.97	1497.03	1509.42	933.266	931.051
chi-miR-23b-3p	21	ATCACATTGCCAGGGATTACC	71678	6442	7116	6481	8291	12323	19321	11704	1540.89	1107.49	1630.86	985.067	1272.27	2425.89	2389.17
chi-miR-342-3p	22	TCTCACACAGAAATCGCACCCA	71483	8375	10377	6286	13390	12784	10986	9285	2003.25	1615.01	1581.79	1590.89	1319.86	1379.37	1895.38
chi-miR-146b-5p	24	TGAGAACTGAATTCCATAGGCTGT	67828	1669	4415	4412	866	4351	35288	16827	399.215	687.123	1110.22	102.891	449.212	4430.66	3434.95
chi-miR-148b-3p	22	TCAGTGCATCACAGAACTTTGT	67769	17233	19450	10753	4667	6487	5455	3724	4122.03	3027.08	2705.85	554.494	669.74	684.914	760.192
chi-let-7d-5p	22	AGAGGTAGTAGGTTGCATAGTT	66271	859	1770	1016	16641	19523	17373	9089	205.468	275.472	255.662	1977.14	2015.62	2181.3	1855.37
chi-miR-183	22	TATGGCACTGGTAGAATTCACT	65449	26996	8700	13881	4703	4695	4406	2068	6457.28	1354.01	3492.96	558.771	484.728	553.204	422.147
chi-miR-301a-3p	23	CAGTGCAATAGTATTGTCAAAGC	64198	895	704	383	19304	18314	15965	8633	214.079	109.566	96.3767	2293.54	1890.8	2004.52	1762.28
chi-miR-130a-3p	21	CAGTGCAATGTTAAAAGGGCA	63763	1670	1867	1312	17995	18279	15011	7629	399.454	290.568	330.147	2138.02	1887.19	1884.74	1557.33
chi-miR-107-3p	21	AGCAGCATTGTACAGGGCTAT	62762	2658	2253	1596	15042	18936	14577	7700	635.778	350.643	401.612	1787.17	1955.02	1830.25	1571.83
chi-miR-126-5p	22	CATTATTACTTTTGGTACGCGC	62475	5456	9037	4139	6981	12883	11394	12585	1305.04	1406.46	1041.52	829.424	1330.09	1430.6	2569.02
chi-miR-362-5p	24	AATCCTTGGAACCTAGGTGTGAGT	60145	11691	20927	8112	6484	7115	3658	2158	2796.42	3256.95	2041.27	770.375	734.577	459.288	440.519
chi-miR-218	21	TTGTGCTTGATCTAACCATGT	58745	10741	5590	3890	14061	9325	9844	5294	2569.18	869.993	978.865	1670.61	962.745	1235.98	1080.68
chi-miR-151-5p	21	TCGAGGAGCTCACAGTCTAGT	55231	8874	16517	10170	5735	5406	5122	3407	2122.61	2570.6	2559.14	681.385	558.134	643.103	695.482
chi-miR-3959-5p	22	GGTTGATCAGAGAACATACATT	54813	3387	7094	3588	12970	14336	9546	3892	810.15	1104.07	902.871	1540.99	1480.1	1198.57	794.486
chi-miR-221-3p	22	AGCTACATTGTCTGCTGGGTTT	53799	1887	3388	4710	9089	14138	11085	9502	451.359	527.287	1185.21	1079.88	1459.66	1391.8	1939.67
chi-miR-409-3p	21	GAATGTTGCTCGGTGAACCCC	53286	5426	11631	3535	15299	10642	5349	1404	1297.87	1810.18	889.534	1817.7	1098.72	671.605	286.603
chi-miR-3958-3p	22	AGATATTGCACGGTTGATCTCT	50825	5009	9507	2986	11196	15835	4245	2047	1198.12	1479.61	751.386	1330.22	1634.86	532.99	417.861
chi-miR-30c-5p	23	TGTAAACATCCTACACTCTCAGC	50082	10944	11633	8055	5766	5950	4700	3034	2617.74	1810.49	2026.93	685.068	614.299	590.118	619.34
chi-miR-380-3p	21	TATGTAATGTGGTCCACGTCT	49134	12056	18746	6419	4522	4831	1839	721	2883.72	2917.51	1615.25	537.266	498.769	230.899	147.18
chi-miR-98-5p	22	TGAGGTAGTAAGTTGTATTGTT	49003	2703	7295	4130	9590	10785	9773	4727	646.541	1135.35	1039.26	1139.4	1113.48	1227.07	964.938
chi-miR-96	21	TTTGGCACTAGCACATTTTTG	48712	15149	4328	12473	4849	5529	4298	2086	3623.55	673.583	3138.66	576.118	570.833	539.644	425.822
chi-miR-127-5p	22	GAAGCTCAGAGGGCTCTGATTC	48173	3945	8903	3125	10698	14171	5514	1817	943.62	1385.61	786.364	1271.05	1463.06	692.322	370.91
chi-miR-9-5p	23	TCTTTGGTTATCTAGCTGTATGA	48127	44227	675	192	1018	1126	577	312	10578.8	105.053	48.3142	120.95	116.252	72.4464	63.6895
chi-miR-708-5p	23	AAGGAGCTTACAATCTAGCTGGG	46827	2180	1443	809	6904	12854	13504	9133	521.443	224.579	203.574	820.276	1327.09	1695.52	1864.35
chi-miR-655	22	ATAATACATGGTTAACCTCTCT	44420	7880	27886	7560	364	592	86	52	1884.85	4340	1902.37	43.2474	61.1201	10.7979	10.6149
chi-miR-410-3p	21	AATATAACACAGATGGCCTGT	43650	11353	25666	5424	409	613	123	62	2715.57	3994.5	1364.88	48.594	63.2883	15.4435	12.6563
chi-miR-191-5p	22	CAACGGAATCCCAAAAGCAGCT	43276	3875	7939	4813	6119	7393	7419	5718	926.877	1235.58	1211.13	727.009	763.279	931.508	1167.23
chi-miR-361-5p	22	TTATCAGAATCTCCAGGGGTAC	41960	4486	7388	4682	7659	7481	6140	4124	1073.02	1149.82	1178.16	909.979	772.364	770.92	841.845
chi-miR-1271-5p	20	CTTGGCACCTAGTAAGTACT	41178	8503	9409	6688	4724	4980	4921	1953	2033.87	1464.36	1682.94	561.266	514.153	617.866	398.672
chi-miR-411a-3p	21	TATGTAACACGGTCCACTAAC	38174	7218	19272	6382	1838	2331	823	310	1726.5	2999.37	1605.94	218.376	240.661	103.334	63.2813
chi-miR-151-3p	21	CTAGACTGAAGCTCCTTGAGG	35896	2932	4406	2951	8664	6920	5456	4567	701.317	685.722	742.579	1029.38	714.445	685.039	932.276
chi-miR-376c-3p	21	AACATAGAGGAAATTCCACGT	35189	2555	5061	1689	8276	10977	4601	2030	611.141	787.662	425.014	983.285	1133.3	577.688	414.39
chi-miR-660	23	TACCCATTGCATATCGGAGCTGT	33572	5938	11122	2874	4521	4836	2671	1610	1420.33	1730.96	723.203	537.148	499.286	335.363	328.654
chi-miR-487b-3p	22	AATCGTACAGGGTCATCCACTT	33441	7083	15417	5437	2168	2340	765	231	1694.21	2399.41	1368.15	257.584	241.59	96.0512	47.1548
chi-miR-224-5p	22	CAAGTCACTAGTGGTTCCGTTT	29883	1484	4033	2332	8644	6405	4418	2567	354.964	627.671	586.816	1027.01	661.274	554.711	524.01
chi-miR-493-3p	22	TGAAGGTCTACTGTGTGCCAGG	28893	5066	12653	3285	2804	3160	1431	494	1211.76	1969.23	826.625	333.148	326.249	179.672	100.842
chi-miR-196b	21	TAGGTAGTTTCCTGTTGTTGG	28865	4363	1206	392	10014	4994	7461	435	1043.6	187.694	98.6414	1189.78	515.598	936.781	88.7979
chi-miR-493-5p	22	TTGTACATGGTAGGCTTTCATT	28770	4531	8243	2289	5304	5826	1823	754	1083.79	1282.89	575.996	630.177	601.496	228.891	153.916
chi-miR-7-5p	24	TGGAAGACTAGTGATTTTGTTGTT	26548	5855	3400	2206	4105	3923	4467	2592	1400.48	529.155	555.11	487.722	405.024	560.863	529.113
chi-miR-497-5p	22	AGCAGCACACTGTGGTTTGTAC	26212	83	112	111	1427	6742	6793	10944	19.8531	17.431	27.9316	169.544	696.067	852.909	2234.03
chi-miR-340-5p	22	TTATAAAGCAATGAGACTGATT	26193	10486	6628	3542	1923	1708	1213	693	2508.19	1031.54	891.296	228.475	176.34	152.301	141.464
chi-miR-499-5p	21	TTAAGACTTGCAGTGATGTTT	26177	5440	15072	1267	2039	963	786	610	1301.22	2345.71	318.823	242.257	99.4235	98.6879	124.521
chi-miR-500-5p	23	TAATCCTTGCTACCTGGGTGAGA	25202	2278	3263	1099	5840	6793	3756	2173	544.884	507.833	276.548	693.86	701.333	471.592	443.581
chi-miR-30b-5p	22	TGTAAACATCCTACACTCAGCT	24271	4037	4245	2472	3087	4665	3550	2215	965.626	660.665	622.045	366.772	481.631	445.728	452.155
chi-miR-335-3p	22	TTTTTCATTATTGCTCCTGACC	23970	7445	9607	2891	2081	1042	419	485	1780.8	1495.17	727.481	247.247	107.58	52.6084	99.0046
chi-miR-128-3p	21	TCACAGTGAACCGGTCTCTTT	22579	3850	5245	1185	4489	4592	1956	1262	920.897	816.299	298.189	533.346	474.094	245.59	257.616
chi-miR-3959-3p	22	TGTATGTCAACTGATCCACAGT	22295	5590	10753	2858	1596	851	359	288	1337.09	1673.53	719.177	189.623	87.8602	45.075	58.7904
chi-miR-423-3p	23	AGCTCGGTCTGAGGCCCCTCAGT	21496	3312	4603	2889	3238	2845	2952	1657	792.211	716.382	726.977	384.712	293.728	370.644	338.249
chi-miR-144-3p	19	TACAGTATAGATGATGTAC	21243	2586	3048	1807	3986	4061	3932	1823	618.556	474.372	454.707	473.583	419.272	493.69	372.135
chi-miR-190a-5p	23	TGATATGTTTGATATATTAGGTT	20460	241	308	165	5322	5734	6078	2612	57.6458	47.9352	41.52	632.316	591.998	763.136	533.196
chi-miR-495-3p	22	AAACAAACATGGTGCACTTCTT	20364	3411	9705	3176	1441	1949	450	232	815.891	1510.43	799.197	171.208	201.221	56.5007	47.3589
chi-miR-106b-5p	21	TAAAGTGCTGACAGTGCAGAT	19592	5094	2976	2597	2025	2505	2691	1704	1218.45	463.166	653.5	240.594	258.625	337.874	347.843
chi-miR-382-5p	22	GAAGTTGTTCGTGGTGGATTCG	18919	1597	2931	1210	5477	4872	1971	861	381.993	456.163	304.48	650.731	503.002	247.473	175.759
chi-miR-432-5p	23	TCTTGGAGTAGGTCATTGGGTGG	18733	3116	5137	1127	3796	4093	1039	425	745.328	799.49	283.594	451.009	422.575	130.454	86.7566
chi-miR-455-5p	22	TATGTGCCTTTGGACTACATCG	18560	1936	1744	1075	3458	5223	3480	1644	463.08	271.425	270.509	410.851	539.241	436.939	335.595
chi-miR-18a-5p	23	TAAGGTGCATCTAGTGCAGATAG	18450	2169	1675	736	3548	3361	4071	2890	518.812	260.687	185.204	421.544	347.001	511.143	589.945
chi-miR-124a	20	TAAGGCACGCGGTGAATGCC	18365	17881	395	54	14	15	6	0	4277.03	61.4753	13.5884	1.6634	1.5487	0.7533	0.01
chi-miR-374b-5p	22	ATATAATACAACCTGCTAAGTG	18042	6435	4818	3094	1069	1114	897	615	1539.21	749.843	778.563	127.01	115.013	112.625	125.542
chi-miR-15a-5p	23	TAGCAGCACATAATGGTTTGTGG	17818	1285	1216	1166	3509	3762	4513	2367	307.364	189.251	293.408	416.91	388.402	566.639	483.183
chi-miR-192-5p	21	CTGACCTATGAATTGACAGCC	16634	4777	4129	1024	1763	1946	1764	1231	1142.63	642.612	257.676	209.465	200.912	221.483	251.288
chi-miR-135a	23	TATGGCTTTTTATTCCTATGTGA	16563	3278	482	512	7605	2469	1467	750	784.078	75.0155	128.838	903.563	254.908	184.192	153.1
chi-miR-194	22	TGTAACAGCAACTCCATGTGGA	16532	3781	2702	974	2587	2597	2245	1646	904.393	420.522	245.094	307.366	268.123	281.876	336.003
chi-miR-455-3p	22	GCAGTCCATGGGCATATACACT	16346	1920	2569	1318	3258	3552	2380	1349	459.252	399.823	331.657	387.088	366.721	298.826	275.376
chi-miR-379-3p	21	TATGTAACATGGTCCACTAAC	16109	3360	6491	2936	1135	1286	633	268	803.692	1010.22	738.804	134.851	132.771	79.4776	54.7077
chi-miR-412-5p	23	TGGTCGACCAGTTGGAAAGTAAT	15622	1871	2619	557	4133	4150	1727	565	447.532	407.605	140.161	491.049	428.46	216.837	115.335
chi-miR-758	22	TTTGTGACCTGGTCCACTAACC	15485	4420	6716	1392	1394	1002	427	134	1057.24	1045.24	350.278	165.624	103.45	53.6129	27.3538
chi-miR-222-3p	24	AGCTACATCTGGCTACTGGGTCTC	15276	292	467	600	3324	3762	3518	3313	69.8446	72.681	150.982	394.93	388.402	441.71	676.293
chi-miR-133b	21	TTTGGTCCCCTTCAACCAGCT	15101	3203	6168	750	1734	2702	76	468	766.138	959.949	188.727	206.019	278.964	9.5423	95.5343
chi-miR-182	21	TTTGGCAATGGTAGAACTCAC	14911	2284	1136	1909	3034	3054	2374	1120	546.319	176.8	480.374	360.475	315.306	298.072	228.629
chi-miR-17-5p	24	CAAAGTGCTTACAGTGCAGGTAGT	14764	5204	3125	2154	810	1009	1479	983	1244.77	486.355	542.025	96.2374	104.173	185.699	200.663
chi-miR-34a	22	TGGCAGTGTCTTAGCTGGTTGT	14722	77	130	228	1510	3950	4630	4197	18.4179	20.2324	57.3731	179.406	407.812	581.329	856.747
chi-miR-500-3p	21	ATGCACCTGGGCAAGGATTCT	14442	2371	5262	2332	1468	1468	993	548	567.129	818.945	586.816	174.416	151.561	124.678	111.865
chi-miR-9-3p	20	ATAAAGCTAGATAACCGAAA	13954	13372	168	56	97	115	100	46	3198.5	26.1465	14.0916	11.5247	11.873	12.5557	9.3901
chi-miR-454-3p	23	TAGTGCAATATTGCTTATAGGGT	13651	2040	2180	970	3207	2121	1963	1170	487.956	339.282	244.087	381.029	218.979	246.469	238.836
chi-miR-28-3p	22	CACTAGATTGAGAGCTCCTGGA	13174	763	1337	825	2977	2637	2383	2252	182.505	208.082	207.6	353.702	272.253	299.202	459.708
chi-miR-214-3p	20	TACAGCAGGCACAGACAGGC	13167	3634	3590	1928	1383	1325	774	533	869.231	558.725	485.155	164.316	136.798	97.1812	108.803
chi-miR-130b-3p	22	CAGTGCAATGATGAAAGGGCAT	12946	976	982	499	4404	2517	2269	1299	233.453	152.832	125.567	523.247	259.864	284.889	265.169
chi-miR-196a	21	TAGGTAGTTTCATGTTGTTGG	12935	2053	699	444	4818	2197	2386	338	491.065	108.788	111.727	572.435	226.826	299.579	68.997
chi-miR-544-5p	21	TCTTGTTAAAAGGCAGATTCT	12867	2527	4335	2481	1405	1359	527	233	604.443	674.672	624.31	166.93	140.308	66.1686	47.563
chi-miR-181c-5p	21	AACATTCAACCTGTCGGTGAG	12040	1168	1110	596	2234	3244	2411	1277	279.379	172.754	149.975	265.425	334.922	302.718	260.678
chi-miR-382-3p	21	AATCATTCACGGACAACACTT	11817	2065	3658	1441	1827	1855	704	267	493.936	569.308	362.608	217.069	191.517	88.3922	54.5036
chi-miR-338-3p	21	TCCAGCATCAGTGATTTTGTT	11734	79	116	96	1704	3151	3994	2594	18.8963	18.0535	24.1571	202.455	325.32	501.475	529.521
chi-miR-125b-3p	21	ACAAGTCAGGCTCTTGGGACC	11694	2321	3063	1706	1316	1449	1180	659	555.169	476.706	429.292	156.356	149.6	148.157	134.524
chi-miR-140-5p	22	CAGTGGTTTTACCCTATGGTAG	11430	4398	2966	250	973	1065	1026	752	1051.98	461.61	62.9091	115.604	109.954	128.821	153.508
chi-miR-148a-5p	22	AAAGTTCTGAGACACTCCGACT	11354	1725	3477	2969	927	1030	901	325	412.61	541.139	747.108	110.138	106.341	113.127	66.3433
chi-miR-376b-3p	19	ATCATAGAGGAAAATCCAT	11163	967	1696	562	2832	3314	1314	478	231.301	263.955	141.42	336.475	342.149	164.982	97.5757
chi-miR-146a	22	TGAGAACTGAATTCCATAGGTT	10940	1979	3728	2518	282	437	1111	885	473.365	580.203	633.62	33.5049	45.1174	139.494	180.658
chi-miR-429	21	TAATACTGTCTGGTAATGCCG	10704	99	215	292	1091	1980	4536	2491	23.6802	33.4613	73.4778	129.624	204.422	569.527	508.496
chi-miR-15b-5p	22	TAGCAGCACATCATGGTTTACA	10578	1009	1067	1005	2265	1853	1962	1417	241.347	166.061	252.894	269.108	191.31	246.343	289.257
chi-miR-29a-3p	21	TAGCACCATCTGAAATCGGTT	10453	588	443	215	689	1717	2149	4652	140.646	68.9457	54.1018	81.8612	177.269	269.822	949.628
chi-miR-155-5p	23	TTAATGCTAATCGTGATAGGGGT	10164	862	1798	692	1583	1713	1135	2381	206.185	279.829	174.132	188.079	176.856	142.507	486.041
chi-miR-708-3p	23	CATCTAGACTGTGAGCTTCTAGA	10134	2509	1314	1013	874	1629	1679	1116	600.138	204.503	254.908	103.841	168.184	210.81	227.813
chi-miR-145-3p	21	ATTCCTGGAAATACTGTTCTT	10008	1410	2692	2491	664	812	967	972	337.264	418.966	626.826	78.8909	83.8337	121.414	198.417
chi-miR-425-5p	23	AATGACACGATCACTCCCGTTGA	9963	1116	1835	1194	1633	1420	1800	965	266.94	285.588	300.454	194.019	146.606	226.003	196.988
chi-miR-324-5p	23	CGCATCCCCTAGGGCATTGGTGT	9796	142	134	62	2444	3095	2594	1325	33.9655	20.8549	15.6015	290.376	319.539	325.695	270.476
chi-miR-376e-3p	22	AACATAGAGGAAAATCCACATT	9685	1962	3284	1607	1064	967	547	254	469.299	511.101	404.38	126.416	99.8364	68.6797	51.8498
chi-miR-30e-3p	21	CTTTCAGTCGGATGTTTACAG	9357	586	807	500	2166	2031	1935	1332	140.168	125.596	125.818	257.346	209.688	242.953	271.905
chi-miR-28-5p	21	AAGGAGCTCACAGTCTATTGA	8997	1447	2194	1671	971	1047	932	735	346.114	341.46	420.484	115.366	108.096	117.019	150.038
chi-miR-423-5p	23	TGAGGGGCAGAGAGCGAGACTTT	8925	893	1311	1008	1352	1606	1436	1319	213.6	204.036	253.649	160.633	165.809	180.3	269.252
chi-miR-33a-5p	20	GTGCATTGTAGTTGCATTGC	8891	333	355	260	2725	2246	1941	1031	79.6516	55.25	65.4254	323.762	231.885	243.706	210.461
chi-miR-193b-3p	22	AACTGGCCCACAAAGTCCCGCT	8811	398	592	399	1240	1965	2345	1872	95.1992	92.1352	100.403	147.327	202.873	294.431	382.137
chi-miR-374a-3p	22	CTTATCAGGTTGTATTGTAATT	8715	1419	1604	1010	1319	1352	1235	776	339.416	249.637	254.153	156.713	139.585	155.063	158.407
chi-miR-181d	23	AACATTCATTGTTGTCGGTGGGT	8566	694	372	283	2672	2221	1515	809	166.001	57.8958	71.2131	317.465	229.304	190.219	165.144
chi-miR-122	22	TGGAGTGTGACAATGGTGTTTG	8544	4492	3693	5	15	245	22	72	1074.46	574.755	1.2582	1.7822	25.2947	2.7623	14.6976
chi-miR-10b-3p	22	ACAGATTCGATTCTAGGGGAAT	7908	2390	2153	1794	562	501	319	189	571.674	335.079	451.436	66.7722	51.725	40.0527	38.5812
chi-miR-331-3p	21	CCCCTGGGCCTATCCTAGAAC	7845	759	792	474	1746	1245	2158	671	181.548	123.262	119.276	207.445	128.538	270.952	136.973
chi-miR-106b-3p	20	CCGCACTGTGGGTACTTGCT	7405	937	1382	543	1842	1129	990	582	224.125	215.086	136.638	218.851	116.562	124.302	118.805
chi-miR-499-3p	22	GAACATCACAGCAAGTCTGTGC	6835	1808	4488	503	13	11	5	7	432.463	698.484	126.573	1.5446	1.1357	0.6278	1.4289
chi-miR-376a	21	GTAGATTCTCCTTCTATGAGT	6700	1567	2748	727	597	690	259	112	374.817	427.682	182.94	70.9306	71.238	32.5193	22.8629
chi-miR-1307-3p	23	ACTCGGCGTGGCGTCGGTCGTGG	6418	322	394	163	1896	1494	1396	753	77.0205	61.3197	41.0167	225.267	154.246	175.278	153.712
chi-miR-369-5p	21	AGATCGACCGTGTTATATTCG	6335	1400	2552	1197	388	492	201	105	334.872	397.177	301.209	46.0989	50.7958	25.237	21.434
chi-miR-34c-5p	23	AGGCAGTGTAGTTAGCTGATTGC	6286	1105	1088	594	1303	1309	592	295	264.309	169.329	149.472	154.812	135.146	74.3298	60.2193
chi-miR-543-3p	21	AAACATTCGCGGTGCACTTCT	6163	861	2895	712	645	861	136	53	205.946	450.56	179.165	76.6335	88.8926	17.0758	10.8191
chi-miR-30f-5p	23	TGTAAACACCCTACACTCTCAGC	6011	1633	1738	1020	388	546	381	305	390.604	270.491	256.669	46.0989	56.3709	47.8372	62.2606
chi-miR-411b-5p	22	TGGTCGACCATAAAACGTACGT	5910	1599	2078	593	620	628	313	79	382.471	323.407	149.22	73.6632	64.8369	39.2994	16.1265
chi-let-7i-3p	22	CTGCGCAAGCTACTGCCTTGCT	5895	263	431	249	1431	1740	1177	604	62.908	67.0781	62.6574	170.019	179.644	147.781	123.296
chi-miR-214-5p	22	TGCCTGTCTACACTTGCTGTGC	5753	387	429	270	1767	1387	1007	506	92.5681	66.7669	67.9418	209.94	143.199	126.436	103.291
chi-miR-301b	23	CAGTGCAATGATATTGTCAAAGC	5546	589	345	190	1799	1049	1055	519	140.885	53.6936	47.8109	213.742	108.302	132.463	105.945
chi-miR-329b-3p	20	AACACACCTGGTTAACCTCT	5327	1224	2785	619	273	304	91	31	292.773	433.44	155.763	32.4356	31.386	11.4257	6.3281
chi-miR-197-3p	22	TTCACCACCTTCTCCACCCAGC	5149	1920	1866	949	143	111	96	64	459.252	290.413	238.803	16.9901	11.46	12.0535	13.0645
chi-miR-144-5p	21	TGGGATATCATCATATACTGT	5107	1442	2167	1021	136	181	121	39	344.918	337.258	256.921	16.1584	18.6871	15.1924	7.9612
chi-miR-188-5p	21	CATCCCTTGCATGGTGGAGGG	5034	742	737	171	1162	1113	739	370	177.482	114.702	43.0298	138.059	114.91	92.7867	75.5293
chi-miR-433	22	ATCATGATGGGCTCCTCGGTGT	4872	650	1265	220	1047	1157	348	185	155.476	196.877	55.36	124.396	119.453	43.6939	37.7646
chi-miR-451-5p	19	AAACCGTTACCATTACTGA	4645	621	879	719	334	420	420	1252	148.54	136.802	180.927	39.6831	43.3623	52.734	255.575
chi-miR-296-3p	22	AGGGTTGGGCGGAGGCTTTCCT	4594	285	463	175	1291	1027	942	411	68.1703	72.0584	44.0364	153.386	106.031	118.275	83.8987
chi-miR-135b-5p	23	TATGGCTTTTCATTCCTATGTGA	4586	587	18	11	281	390	1418	1881	140.407	2.8014	2.768	33.3861	40.265	178.04	383.974
chi-miR-487a-3p	22	AATCATACAGGGACATCCAGTT	4526	1269	1551	378	579	433	229	87	303.537	241.388	95.1185	68.792	44.7044	28.7526	17.7596
chi-miR-22-3p	19	AAGCTGCCAGTTGAAGAAC	4315	258	509	324	607	952	975	690	61.7121	79.2176	81.5302	72.1187	98.2878	122.418	140.852
chi-miR-532-3p	21	CCTCCCACACCCAAGGCTTGC	4301	984	1361	392	473	561	305	225	235.367	211.817	98.6414	56.1979	57.9196	38.2949	45.93
chi-miR-378-5p	22	CTCCTGACTCCAGGTCCTGTGT	4291	190	553	319	1645	946	374	264	45.4469	86.0655	80.272	195.445	97.6683	46.9583	53.8912
chi-miR-363-3p	22	AATTGCACGGTATCCATCTGCG	4105	818	642	196	592	897	676	284	195.661	99.9169	49.3207	70.3365	92.6094	84.8766	57.9738
chi-miR-362-3p	21	AACACACCTATTCAAGGATTC	3948	715	935	401	539	789	361	208	171.024	145.518	100.906	64.0395	81.4591	45.3261	42.4597
chi-miR-874-3p	23	CTGCCCTGGCCCGAGGGACCGAC	3844	611	767	245	690	578	591	362	146.148	119.371	61.6509	81.98	59.6747	74.2042	73.8962
chi-miR-154a-3p	22	AATCATACACGGTTCACCTACT	3731	810	2056	552	143	122	33	15	193.747	319.983	138.903	16.9901	12.5957	4.1434	3.062
chi-miR-323a-3p	21	CACATTACACGGTCGACCTCT	3615	989	1124	244	624	445	132	57	236.563	174.932	61.3993	74.1385	45.9433	16.5735	11.6356
chi-miR-545-5p	21	CTCAGTAAATGTTTATTGGAT	3480	8	7	2	1151	928	965	419	1.9136	1.0894	0.5033	136.752	95.8099	121.163	85.5318
chi-miR-30a-3p	21	CTTTCAGTCGGATGTTTGCAG	3433	336	521	224	699	724	497	432	80.3692	81.0852	56.3665	83.0494	74.7483	62.4019	88.1855
chi-miR-1197-3p	21	TAGGACACATGGTCTACTTCT	3370	1372	1016	226	315	302	97	42	328.174	158.124	56.8698	37.4257	31.1795	12.179	8.5736
chi-miR-424-3p	21	CAAAACGTGAGGCGCTGCTAT	3355	409	687	458	681	585	377	158	97.8303	106.92	115.249	80.9107	60.3974	47.335	32.253
chi-miR-1468-5p	22	CTCCGTTTGCCTGTTTTGCTGA	3355	133	343	156	532	886	697	608	31.8128	53.3824	39.2553	63.2078	91.4737	87.5133	124.113
chi-miR-99a-3p	23	CAAGCTCGCTTCTATGGGTCTGT	3262	381	358	249	562	776	587	349	91.1329	55.7169	62.6574	66.7722	80.1169	73.702	71.2425
chi-miR-485-3p	23	AGTCATACACGGCTCTCCTCTCT	3249	774	1181	271	488	354	120	61	185.136	183.803	68.1934	57.9801	36.5482	15.0668	12.4521
chi-miR-143-5p	21	GGTGCAGTGCTGCATCTCTGG	3227	554	606	376	332	432	532	395	132.513	94.314	94.6153	39.4455	44.6012	66.7964	80.6326
chi-miR-154b-5p	22	AGAGGTCTTCCATGGTGCATTC	3142	466	1366	504	279	342	147	38	111.464	212.596	126.825	33.1485	35.3093	18.4569	7.7571
chi-miR-146b-3p	23	TGCCCTAGGGACTCAGTTCTGGT	3102	6	19	18	35	274	1869	881	1.4352	2.957	4.5295	4.1584	28.2887	234.666	179.841
chi-miR-361-3p	22	TCCCCCAGGTGTGATTCTGATT	3073	127	204	128	648	808	636	522	30.3776	31.7493	32.2095	76.99	83.4207	79.8543	106.558
chi-miR-485-5p	22	AGAGGCTGGCCGTGATGAATTC	3064	276	591	219	695	769	358	156	66.0175	91.9795	55.1084	82.5741	79.3942	44.9494	31.8448
chi-miR-3432-5p	22	TGCGGGATCTTTAGTTGTGGCG	2957	277	222	119	779	604	500	456	66.2567	34.5507	29.9447	92.5543	62.3591	62.7785	93.0847
chi-miR-365-3p	22	TAATGCCCCTAAAAATCCTTAT	2843	172	227	337	336	663	580	528	41.1414	35.3289	84.8014	39.9207	68.4504	72.8231	107.782
chi-miR-376c-5p	22	GGTGGATATTCCTTCTATGTTT	2773	417	519	258	556	645	236	142	99.7439	80.7739	64.9222	66.0593	66.592	29.6315	28.9869
chi-miR-1343	22	CTCCTGGGGCCCGCACTCTCGC	2714	295	445	130	636	508	419	281	70.5622	69.257	32.7127	75.5642	52.4477	52.6084	57.3614
chi-miR-376b-5p	22	GGTGGATATTCCTTCTATGTTT	2701	410	524	253	529	617	231	137	98.0695	81.5521	63.664	62.8514	63.7012	29.0037	27.9662
chi-miR-376e-5p	22	GGTGGATATTCCTTCTATGTTT	2701	410	524	253	529	617	231	137	98.0695	81.5521	63.664	62.8514	63.7012	29.0037	27.9662
chi-miR-504	21	AGACCCTGGTCTGCACTCTGT	2686	434	298	277	1145	266	148	118	103.81	46.3789	69.7033	136.039	27.4628	18.5824	24.0877
chi-miR-208b	22	TATAAGACGAACAAAAGGTTTG	2673	695	1928	41	9	0	0	0	166.24	300.062	10.3171	1.0693	0.01	0.01	0.01
chi-miR-665	20	ACCAGTAGGCCGAGGCCCCT	2626	339	785	265	420	442	291	84	81.0868	122.172	66.6836	49.9009	45.6336	36.5371	17.1472
chi-let-7d-3p	21	CTATACGACCTGCTGCCTTTC	2563	129	413	196	576	524	364	361	30.856	64.2767	49.3207	68.4355	54.0996	45.7028	73.6921
chi-miR-374b-3p	22	CTTATCAGGTTGTATTATCATT	2560	228	270	113	500	593	536	320	54.5362	42.0211	28.4349	59.4058	61.2234	67.2986	65.3226
chi-miR-130b-5p	22	ACTCTTTCCCTGTTGCACTACT	2544	510	470	321	611	331	190	111	121.989	73.1479	80.7753	72.5939	34.1736	23.8558	22.6588
chi-miR-17-3p	24	ACTGCAGTGAAGGCACTTGTAGCA	2520	348	278	211	447	432	513	291	83.2395	43.2662	53.0953	53.1088	44.6012	64.4108	59.4028
chi-miR-483	22	CACTCCTCTCCTCCCGTCTTCT	2513	711	1076	214	172	249	48	43	170.067	167.462	53.8502	20.4356	25.7076	6.0267	8.7777
chi-miR-188-3p	21	CTCCCACATGCAGGGTTTGCA	2397	650	714	223	246	294	176	94	155.476	111.123	56.1149	29.2277	30.3536	22.098	19.1885
chi-miR-545-3p	22	TCAACAAACATTTATTGTGTGC	2292	103	70	34	635	566	517	367	24.637	10.8944	8.5556	75.4454	58.4358	64.913	74.9169
chi-miR-186-3p	20	CCCAAAGGTGAATTTTTTGG	2284	4	2	2	574	649	720	333	0.9568	0.3113	0.5033	68.1979	67.005	90.4011	67.9763
chi-miR-133a-5p	22	AGCTGGTAAAATGGAACCAAAT	2271	286	943	190	239	398	31	184	68.4095	146.763	47.8109	28.396	41.0909	3.8923	37.5605
chi-miR-181c-3p	22	ACCATCGACCGTTGAGTGGACC	2224	613	324	169	429	369	233	87	146.626	50.4253	42.5265	50.9702	38.0968	29.2548	17.7596
chi-miR-505-3p	22	TCAACACTTGCTGGTTTCCTCT	2194	445	499	397	307	221	193	132	106.441	77.6612	99.8996	36.4752	22.8168	24.2325	26.9456
chi-miR-328-3p	22	CTGGCCCTCTCTGCCCTTCCGT	2169	115	194	85	666	513	385	211	27.5073	30.1929	21.3891	79.1286	52.9639	48.3395	43.0721
chi-miR-3431-3p	22	ATCTAGAGGACTGACTGAAATT	2163	138	296	190	709	424	245	161	33.0088	46.0676	47.8109	84.2375	43.7752	30.7615	32.8654
chi-miR-1185-3p	22	ATATACAGAGGGAGACTCTTAT	2142	481	859	165	280	263	69	25	115.052	133.689	41.52	33.2673	27.153	8.6634	5.1033
chi-miR-1388-3p	22	ATCTCAGGTTCGTCAGCCCGCA	2087	98	163	111	535	465	466	249	23.441	25.3683	27.9316	63.5642	48.0082	58.5096	50.8292
chi-miR-323b	21	CACAATACACGGTCGGCCTCT	2070	460	625	142	359	303	125	56	110.029	97.2711	35.7324	42.6534	31.2828	15.6946	11.4315
chi-miR-154b-3p	23	ATCATACATGGTTGACCTTTTTT	2056	670	956	297	60	53	14	6	160.26	148.786	74.736	7.1287	5.4719	1.7578	1.2248
chi-miR-345-5p	21	GCTGACTCCTAGTCCAGTGCT	2038	163	141	72	481	566	385	230	38.9886	21.9444	18.1178	57.1484	58.4358	48.3395	46.9506
chi-miR-1185-5p	20	AGAGGATACCCTTTGTATGT	1967	328	646	227	248	324	128	66	78.4556	100.539	57.1214	29.4653	33.4509	16.0713	13.4728
chi-miR-671-5p	24	AGGAAGCCCTGGAGGGGCTGGAGG	1945	67	111	90	562	527	398	190	16.026	17.2753	22.6473	66.7722	54.4093	49.9717	38.7853
chi-miR-3955-5p	22	TTTGATGGCTGATCCTCTCACT	1902	145	386	147	248	546	196	234	34.6831	60.0746	36.9905	29.4653	56.3709	24.6092	47.7672
chi-miR-421-3p	23	ATCAACAGACATTAATTGGGCGC	1873	523	373	125	214	241	249	148	125.099	58.0514	31.4545	25.4257	24.8817	31.2637	30.2117
chi-miR-148b-5p	23	GAAGTTCTGTTATACACTCAGGC	1805	248	396	215	251	302	239	154	59.3201	61.631	54.1018	29.8217	31.1795	30.0081	31.4365
chi-miR-377	22	AATCACACAAAGGCAACTTTTG	1712	165	690	347	198	224	77	11	39.467	107.387	87.3178	23.5247	23.1265	9.6679	2.2455
chi-miR-1306-5p	21	CCACCTCCCCTGCAAACGTCC	1631	79	130	37	410	413	367	195	18.8963	20.2324	9.3105	48.7128	42.6396	46.0794	39.806
chi-miR-376d	21	ATCATAGAGGAAAATCCACAT	1624	327	474	174	288	223	100	38	78.2164	73.7704	43.7847	34.2178	23.0233	12.5557	7.7571
chi-miR-582-5p	22	TACAGTTGTTCAACCAGTTACT	1533	54	34	78	440	305	423	199	12.9165	5.2915	19.6276	52.2771	31.4893	53.1106	40.6225
chi-miR-106a-5p	24	AAAAGTGCTTACAGTGCAGGTAGC	1450	722	439	237	13	15	10	14	172.698	68.3232	59.6378	1.5446	1.5487	1.2556	2.8579
chi-miR-496-3p	21	TGAGTATTACATGGCCAATCT	1440	409	685	214	54	53	19	6	97.8303	106.609	53.8502	6.4158	5.4719	2.3856	1.2248
chi-miR-331-5p	21	TCTAGGTATGGTCCCAGGGAT	1437	158	231	104	260	264	229	191	37.7927	35.9514	26.1702	30.891	27.2563	28.7526	38.9894
chi-miR-502b-5p	22	TAATTCTTGCTCCCCAGGTGAG	1434	127	184	41	358	344	240	140	30.3776	28.6366	10.3171	42.5346	35.5158	30.1337	28.5786
chi-miR-223-3p	22	TGTCAGTTTGTCAAATACCCCA	1392	35	25	5	198	279	376	474	8.3718	3.8908	1.2582	23.5247	28.8049	47.2095	96.7591
chi-miR-340-3p	22	TCCGTCTCAGTTACTTTATAGC	1346	441	416	237	83	73	48	48	105.485	64.7436	59.6378	9.8614	7.5368	6.0267	9.7984
chi-miR-2483-5p	22	CGTCAACCATCCAGCTGTTTGA	1313	129	75	46	316	391	222	134	30.856	11.6725	11.5753	37.5445	40.3682	27.8737	27.3538
chi-miR-204-5p	22	TTCCCTTTGTCATCCTATGCCT	1308	216	224	169	299	169	127	104	51.6659	34.862	42.5265	35.5247	17.4481	15.9457	21.2298
chi-miR-1388-5p	21	AGGACTGTCCAACCTGAGAAT	1215	304	432	389	41	34	15	0	72.715	67.2338	97.8865	4.8713	3.5103	1.8834	0.01
chi-miR-20b	23	CAAAGTGCTCACAGTGCAGGTAG	1199	528	368	124	52	52	50	25	126.294	57.2732	31.2029	6.1782	5.3687	6.2779	5.1033
chi-miR-10a-3p	21	CAAATTCGTATCTAGGGGAAT	1177	439	130	167	142	154	61	84	105.006	20.2324	42.0233	16.8713	15.8995	7.659	17.1472
chi-miR-137	22	ATTGCTTAAGAATACGCGTAGT	1176	933	63	29	50	52	15	34	223.168	9.8049	7.2975	5.9406	5.3687	1.8834	6.9405
chi-let-7a-3p	22	CTATACAATCTACTGTCTTTCC	1142	91	159	112	174	265	197	144	21.7667	24.7458	28.1833	20.6732	27.3595	24.7347	29.3952
chi-miR-105a	22	TCAAATGCTCAGACTCCTGTGG	1137	240	179	108	440	113	40	17	57.4066	27.8584	27.1767	52.2771	11.6665	5.0223	3.4703
chi-miR-656	21	AATATTATACAGTCAACCTCT	1111	296	409	212	81	71	33	9	70.8014	63.6542	53.3469	9.6237	7.3303	4.1434	1.8372
chi-miR-20a-3p	21	ACTGCATTATGAGCACTTAAA	1096	141	124	111	242	202	159	117	33.7264	19.2986	27.9316	28.7524	20.8552	19.9636	23.8836
chi-miR-345-3p	22	CCCTGAACTAGGGGTCTGGAGG	1078	177	176	108	248	148	156	65	42.3373	27.3915	27.1767	29.4653	15.28	19.5869	13.2687
chi-miR-767	22	TGCACCATGGTTGTCTGAGCAT	1073	179	143	88	454	152	34	23	42.8157	22.2556	22.144	53.9405	15.693	4.2689	4.6951
chi-miR-330-3p	22	CAAAGCACACGGCCTGCAGAGA	1069	138	122	82	171	190	214	152	33.0088	18.9873	20.6342	20.3168	19.6163	26.8692	31.0282
chi-miR-184	22	TGGACGGAGAACTGATAAGGGT	1048	8	6	0	0	22	551	461	1.9136	0.9338	0.01	0.01	2.2714	69.1819	94.1054
chi-miR-491-5p	22	AGTGGGGAACCCTTCCATGAGG	1004	18	30	26	263	280	251	136	4.3055	4.669	6.5425	31.2475	28.9082	31.5148	27.7621
chi-miR-27a-5p	22	AGGGCTTAGCTGCTTGTGAGCA	998	23	44	54	141	195	398	143	5.5015	6.8479	13.5884	16.7524	20.1325	49.9717	29.191
chi-miR-221-5p	21	ACCTGGCATACAATGTAGATT	981	48	97	185	121	197	195	138	11.4813	15.0965	46.5527	14.3762	20.339	24.4836	28.1704
chi-miR-7-3p	21	AACAAATCACAGTCTGCCATA	961	81	54	40	184	209	232	161	19.3747	8.4042	10.0655	21.8613	21.5779	29.1292	32.8654
chi-miR-153	22	TTGCATAGTCACAAAAGTGATC	957	730	73	31	48	26	25	24	174.612	11.3613	7.8007	5.703	2.6843	3.1389	4.8992
chi-miR-1296	22	TTAGGGCCCTGGCTCCATCTCC	953	111	143	46	227	183	156	87	26.5505	22.2556	11.5753	26.9702	18.8936	19.5869	17.7596
chi-miR-134	22	TGTGACTGGTTGACCAGAGGGG	924	126	231	81	235	150	67	34	30.1384	35.9514	20.3825	27.9207	15.4865	8.4123	6.9405
chi-miR-877-5p	21	GTAGAGGAGATGGCGCAGGGG	849	91	144	79	153	151	134	97	21.7667	22.4113	19.8793	18.1782	15.5898	16.8246	19.8009
chi-miR-27b-5p	22	AGAGCTTAGCTGATTGGTGAAC	833	21	16	35	122	192	245	202	5.0231	2.4901	8.8073	14.495	19.8227	30.7615	41.2349
chi-miR-211	22	TTCCCTTTGTCATCCTTTGCCC	831	41	146	231	61	197	74	81	9.807	22.7225	58.128	7.2475	20.339	9.2912	16.5348
chi-miR-92a-5p	23	AGGTTGGGATCAGTTGCAATGCT	811	29	28	16	182	183	250	123	6.9366	4.3577	4.0262	21.6237	18.8936	31.3893	25.1084
chi-miR-21-3p	21	CAACAGCAGTCGATGGGCTGT	775	68	105	58	122	155	181	86	16.2652	16.3415	14.5949	14.495	16.0027	22.7258	17.5555
chi-miR-93-3p	23	ACTGCTGAGCCAGCACTTCCCGA	772	43	50	19	222	201	152	85	10.2853	7.7817	4.7811	26.3762	20.7519	19.0847	17.3513
chi-miR-129-5p	21	CTTTTTGCGGTCTGGGCTTGC	753	92	91	57	278	194	23	18	22.0058	14.1627	14.3433	33.0296	20.0292	2.8878	3.6744
chi-miR-490	23	CAACCTGGAGGACTCCATGCTGT	748	230	304	65	42	42	19	46	55.0146	47.3127	16.3564	4.9901	4.3362	2.3856	9.3901
chi-miR-193a	19	AACTGGCCCACAAAGTCCC	737	71	114	70	72	149	147	114	16.9828	17.7422	17.6145	8.5544	15.3833	18.4569	23.2712
chi-miR-224-3p	22	AAATGGTACCCTAGTGACTACA	698	122	219	161	65	71	37	23	29.1817	34.0838	40.5134	7.7228	7.3303	4.6456	4.6951
chi-miR-301a-5p	21	GCTCTGACTTTATTGCACTAC	673	251	192	102	43	43	29	13	60.0377	29.8817	25.6669	5.1089	4.4395	3.6412	2.6537
chi-miR-329a-3p	20	AACACACCTGGTTAACCTTT	661	193	324	105	16	17	4	2	46.1644	50.4253	26.4218	1.901	1.7551	0.5022	0.4083
chi-miR-33b-5p	19	GTGCATTGCTGTTGCATTG	643	5	0	2	166	190	183	97	1.196	0.01	0.5033	19.7227	19.6163	22.9769	19.8009
chi-miR-202-5p	21	TTCCTATGCATATACTTCTTT	635	617	4	2	0	2	3	7	147.583	0.6225	0.5033	0.01	0.2065	0.3767	1.4289
chi-miR-150	22	TCTCCCAACCCTTGTACCAGTG	624	16	48	37	57	134	125	207	3.8271	7.4704	9.3105	6.7723	13.8346	15.6946	42.2556
chi-miR-101-5p	22	TCAGTTATCACAGTGCTGATGC	581	12	10	10	95	171	134	149	2.8703	1.5563	2.5164	11.2871	17.6546	16.8246	30.4158
chi-miR-187	20	TCGTGTCTTGTGTTGCAGCC	580	0	0	7	204	114	167	88	0.01	0.01	1.7615	24.2376	11.7698	20.968	17.9637
chi-miR-125a-3p	21	ACAGGTGAGGTTCTTGGGAGC	580	88	120	48	118	100	59	47	21.0491	18.676	12.0785	14.0198	10.3243	7.4079	9.5943
chi-miR-383	23	AGATCAGAAGGTGATTGTGGCTT	563	49	34	3	388	51	26	12	11.7205	5.2915	0.7549	46.0989	5.2654	3.2645	2.4496
chi-miR-30d-3p	21	TTTCAGTCAGATGTTTGCTGC	563	65	52	30	76	132	113	95	15.5476	8.093	7.5491	9.0297	13.6281	14.1879	19.3927
chi-miR-216b	23	AAATCTCTGCAGGCAAATGTGAT	553	96	105	25	86	92	98	51	22.9626	16.3415	6.2909	10.2178	9.4984	12.3046	10.4108
chi-miR-1307-5p	17	TCGACCGGACCTCGACC	542	99	124	54	64	51	127	23	23.6802	19.2986	13.5884	7.6039	5.2654	15.9457	4.6951
chi-miR-2483-3p	22	AAACATCTGGTTGGTTGAGAGA	540	31	28	15	154	154	104	54	7.415	4.3577	3.7745	18.297	15.8995	13.0579	11.0232
chi-miR-3955-3p	23	TGGGATTTTAGTCCATCATAGAG	534	54	160	102	50	94	43	31	12.9165	24.9014	25.6669	5.9406	9.7049	5.399	6.3281
chi-miR-25-5p	23	AGGCGGAGACTTGGGCAATTGCT	511	33	43	65	129	114	72	55	7.8934	6.6923	16.3564	15.3267	11.7698	9.0401	11.2273
chi-let-7e-3p	22	CTATACGGCCTCCTAGCTTTCC	487	100	103	45	75	64	62	38	23.9194	16.0303	11.3236	8.9109	6.6076	7.7845	7.7571
chi-miR-30f-3p	22	CTGGGAGGAGGCTGTTTACTCT	487	36	74	46	92	108	78	53	8.611	11.5169	11.5753	10.9307	11.1503	9.7935	10.8191
chi-miR-22-5p	21	AGTTCTTCAGTGGCAAGCTTT	483	39	22	34	96	115	114	63	9.3286	3.4239	8.5556	11.4059	11.873	14.3135	12.8604
chi-miR-18b-5p	19	TAAGGTGCATCTAGTGCAG	472	172	76	26	70	52	49	27	41.1414	11.8282	6.5425	8.3168	5.3687	6.1523	5.5116
chi-miR-99b-3p	20	CAAGCTCGTGTCTGTGGGTC	471	124	105	40	49	68	48	37	29.6601	16.3415	10.0655	5.8218	7.0206	6.0267	7.5529
chi-miR-29b-3p	20	TAGCACCATTTGAAATCAGT	421	27	28	8	49	68	111	130	6.4582	4.3577	2.0131	5.8218	7.0206	13.9368	26.5373
chi-miR-502b-3p	24	ATCCACCTGGGCAAGGATTCTGAA	416	126	147	32	58	29	13	11	30.1384	22.8782	8.0524	6.8911	2.9941	1.6322	2.2455
chi-miR-217-5p	23	TACTGCATCAGGAACTGATTGGA	414	63	125	27	63	51	58	27	15.0692	19.4542	6.7942	7.4851	5.2654	7.2823	5.5116
chi-miR-324-3p	21	ACTGCCCCAGGTGCTGCTGGG	412	26	29	14	99	100	101	43	6.219	4.5134	3.5229	11.7624	10.3243	12.6813	8.7777
chi-miR-195-3p	21	CCAATATTGGCTGTGCTGCTC	408	2	5	5	24	121	130	121	0.4784	0.7782	1.2582	2.8515	12.4925	16.3224	24.7001
chi-miR-628-5p	23	ATGCTGACATATTTACTAGAGGG	321	49	35	11	66	56	63	41	11.7205	5.4472	2.768	7.8416	5.7816	7.9101	8.3695
chi-miR-16b-3p	22	ACCAATATTATTGTGCTGCTTT	310	40	66	42	47	70	29	16	9.5678	10.2718	10.5687	5.5841	7.227	3.6412	3.2661
chi-miR-193b-5p	22	CGGGGTTTTGAGGGCGAGATGA	308	3	6	13	39	81	102	64	0.7176	0.9338	3.2713	4.6337	8.3627	12.8068	13.0645
chi-miR-18a-3p	23	ACTGCCCTAAGTGCTCCTTCTGG	304	26	28	14	60	62	76	38	6.219	4.3577	3.5229	7.1287	6.4011	9.5423	7.7571
chi-miR-342-5p	23	AGGGGTGCTATCTGTGGTTGAGG	301	22	8	3	90	89	54	35	5.2623	1.2451	0.7549	10.693	9.1887	6.7801	7.1447
chi-miR-1271-3p	20	AGTGCCTGCTATGTGCCAGG	283	116	111	56	0	0	0	0	27.7465	17.2753	14.0916	0.01	0.01	0.01	0.01
chi-miR-24-5p	20	GTGCCTACTGAGCTGATATC	270	53	30	44	23	33	55	32	12.6773	4.669	11.072	2.7327	3.407	6.9056	6.5323
chi-miR-30c-3p	21	CTGGGAGAGGGTTGTTTACTC	264	33	38	33	50	49	38	23	7.8934	5.9141	8.304	5.9406	5.0589	4.7712	4.6951
chi-miR-215-5p	21	ATGACCTATGAATTGACAGAC	253	245	5	0	0	0	0	3	58.6025	0.7782	0.01	0.01	0.01	0.01	0.6124
chi-miR-33a-3p	21	CAATGTTTCCACAGTGCATCA	252	28	32	32	37	41	52	30	6.6974	4.9803	8.0524	4.396	4.233	6.529	6.124
chi-let-7g-3p	22	CTGTACAGGCCACTGCCTTGCC	246	6	24	10	62	69	47	28	1.4352	3.7352	2.5164	7.3663	7.1238	5.9012	5.7157
chi-miR-380-5p	23	ATGGTTGACCACAGAACATGCGC	245	21	41	13	61	67	29	13	5.0231	6.381	3.2713	7.2475	6.9173	3.6412	2.6537
chi-miR-191-3p	21	CTGCGCTTGGATTTCGTTCCC	240	17	31	24	44	46	58	20	4.0663	4.8246	6.0393	5.2277	4.7492	7.2823	4.0827
chi-miR-2411-5p	27	GTGGAGTGACTGTCAGATGCAGCCAGC	226	48	86	44	10	3	14	21	11.4813	13.3845	11.072	1.1881	0.3097	1.7578	4.2868
chi-miR-26b-3p	22	CCTGTTCTCCATTACTTGGCTC	224	33	55	40	22	32	24	18	7.8934	8.5599	10.0655	2.6139	3.3038	3.0134	3.6744
chi-let-7b-3p	22	CTATACAACCTACTGCCTTCCT	221	28	60	61	14	30	18	10	6.6974	9.338	15.3498	1.6634	3.0973	2.26	2.0413
chi-miR-15b-3p	21	CGAATCATTATTTGCTGCTCT	221	49	62	18	33	21	19	19	11.7205	9.6493	4.5295	3.9208	2.1681	2.3856	3.8785
chi-miR-338-5p	21	AACAATATCCTGGTGCTGAGT	220	67	54	50	7	5	15	22	16.026	8.4042	12.5818	0.8317	0.5162	1.8834	4.4909
chi-miR-1249	22	ACGCCCTTCCCCCCCTTCTTCA	219	56	60	37	14	27	14	11	13.3949	9.338	9.3105	1.6634	2.7876	1.7578	2.2455
chi-miR-1306-3p	22	ACGTTGGCTCTGGTGGTGATGG	217	5	19	4	56	56	49	28	1.196	2.957	1.0065	6.6535	5.7816	6.1523	5.7157
chi-miR-496-5p	20	GAGTCGGGTACTCGAATGGA	205	41	103	22	23	7	6	3	9.807	16.0303	5.536	2.7327	0.7227	0.7533	0.6124
chi-miR-29c-5p	23	TGACCGATTTCTCCTGGTGTTCA	194	8	11	10	21	40	53	51	1.9136	1.712	2.5164	2.495	4.1297	6.6545	10.4108
chi-miR-449a-5p	21	TGGCAGTGTATTGTTAGCTGG	191	21	20	14	35	32	39	30	5.0231	3.1127	3.5229	4.1584	3.3038	4.8967	6.124
chi-miR-425-3p	22	CATCGGGAATGTCGTGTCCGCC	187	19	12	11	34	40	48	23	4.5447	1.8676	2.768	4.0396	4.1297	6.0267	4.6951
chi-miR-874-5p	23	CGGCCCCACGCACCAGGGTAAGA	185	15	14	4	41	47	35	29	3.5879	2.1789	1.0065	4.8713	4.8524	4.3945	5.9199
chi-miR-129-3p	22	AAGCCCTTACCCCAAAAAGCAT	173	37	48	20	36	28	4	0	8.8502	7.4704	5.0327	4.2772	2.8908	0.5022	0.01
chi-miR-326-3p	21	CCTCTGGGCCCTTCCTCCAGC	172	17	23	13	49	38	19	13	4.0663	3.5796	3.2713	5.8218	3.9233	2.3856	2.6537
chi-miR-2332	24	CGGTTTAAGGTCTTGGAGACAAAG	164	0	7	0	30	25	26	76	0.01	1.0894	0.01	3.5643	2.5811	3.2645	15.5141
chi-miR-219	21	TGATTGTCCAAACGCAATTCT	160	142	5	0	6	5	2	0	33.9655	0.7782	0.01	0.7129	0.5162	0.2511	0.01
chi-miR-105b-3p	22	CCACGGATGTTTGAGCATGTGC	160	36	25	3	76	17	3	0	8.611	3.8908	0.7549	9.0297	1.7551	0.3767	0.01
chi-miR-432-3p	22	ACTGGATGGCTCCTCCATGTCT	158	28	48	9	22	35	12	4	6.6974	7.4704	2.2647	2.6139	3.6135	1.5067	0.8165
chi-miR-487b-5p	21	CTAACCTTTGGTACTTGGAGA	157	30	91	28	6	2	0	0	7.1758	14.1627	7.0458	0.7129	0.2065	0.01	0.01
chi-miR-873-5p	19	TGCAGGAACTTGTGAGTCT	155	55	63	17	13	3	2	2	13.1557	9.8049	4.2778	1.5446	0.3097	0.2511	0.4083
chi-miR-23b-5p	22	TGGGTTCCTGGCATGCTGATTT	152	14	24	16	19	25	38	16	3.3487	3.7352	4.0262	2.2574	2.5811	4.7712	3.2661
chi-miR-105b-5p	23	TCAAATGCTCAGACTCCTTGGTG	149	60	22	10	45	10	0	2	14.3516	3.4239	2.5164	5.3465	1.0324	0.01	0.4083
chi-miR-330-5p	20	TCTCTGGGCCTGTGTCTTAG	148	20	9	12	25	30	27	25	4.7839	1.4007	3.0196	2.9703	3.0973	3.39	5.1033
chi-miR-412-3p	21	ACTTCACCTGGTCCACTAGCT	146	42	85	7	7	3	0	2	10.0461	13.2289	1.7615	0.8317	0.3097	0.01	0.4083
chi-miR-29a-5p	21	ACTGATTTCTTTTGGTGTTCA	144	0	0	0	15	31	36	62	0.01	0.01	0.01	1.7822	3.2005	4.5201	12.6563
chi-miR-181b-3p	21	CTCACTGATCAATGAATGCAA	137	23	22	13	37	17	22	3	5.5015	3.4239	3.2713	4.396	1.7551	2.7623	0.6124
chi-miR-34b-3p	22	AATCACTAGTTCCACTGCCATC	136	43	50	32	8	3	0	0	10.2853	7.7817	8.0524	0.9505	0.3097	0.01	0.01
chi-miR-487a-5p	19	AGCCTTTGGTACTTGAAGA	136	21	74	18	11	9	3	0	5.0231	11.5169	4.5295	1.3069	0.9292	0.3767	0.01
chi-miR-130a-5p	22	GCTCTTTTCACATTGTGCTACT	132	21	18	16	25	26	14	12	5.0231	2.8014	4.0262	2.9703	2.6843	1.7578	2.4496
chi-miR-30b-3p	22	CTGGGAGGTGGATGTTTACTTC	130	11	16	9	24	23	25	22	2.6311	2.4901	2.2647	2.8515	2.3746	3.1389	4.4909
chi-miR-15a-3p	22	CAGGCCATATTGTGCTGCCTCA	128	0	0	0	20	38	51	19	0.01	0.01	0.01	2.3762	3.9233	6.4034	3.8785
chi-miR-19b-5p	23	AGTTTTGCAGGTTTGCATCCAGC	125	26	23	21	18	12	21	4	6.219	3.5796	5.2844	2.1386	1.2389	2.6367	0.8165
chi-miR-671-3p	21	TCCGGTTCTCAGGGCTCCACC	122	7	3	8	31	30	23	20	1.6744	0.4669	2.0131	3.6832	3.0973	2.8878	4.0827
chi-let-7c-3p	22	CTGTACAACCTTCTAGCTTTCC	118	15	18	6	24	22	21	12	3.5879	2.8014	1.5098	2.8515	2.2714	2.6367	2.4496
chi-miR-100-3p	21	CAAGCTTGTGTCTATAGGTAT	114	13	2	2	35	33	19	10	3.1095	0.3113	0.5033	4.1584	3.407	2.3856	2.0413
chi-miR-3432-3p	22	CAGCAACTAAAGATCCCTCAGG	111	13	17	4	22	20	21	14	3.1095	2.6458	1.0065	2.6139	2.0649	2.6367	2.8579
chi-miR-411b-3p	21	TATGTCACATGGTCCACTAAT	109	40	50	8	3	5	3	0	9.5678	7.7817	2.0131	0.3564	0.5162	0.3767	0.01
chi-miR-190a-3p	21	CTATATATCAAACATATTCCT	107	18	21	12	11	21	15	9	4.3055	3.2683	3.0196	1.3069	2.1681	1.8834	1.8372
chi-miR-16a-3p	28	AAATTATCTCCAGTATTAACTGTGCTGC	103	0	0	4	16	29	27	27	0.01	0.01	1.0065	1.901	2.9941	3.39	5.5116
chi-miR-592	22	TTGTGTCAATATGCGATGATGT	97	36	9	5	13	22	12	0	8.611	1.4007	1.2582	1.5446	2.2714	1.5067	0.01
chi-miR-34c-3p	22	AATCACTAACCACACGGCCAGG	97	25	17	12	19	13	8	3	5.9798	2.6458	3.0196	2.2574	1.3422	1.0045	0.6124
chi-miR-2331	20	ACCCTGCAGCCAAAGAAGCT	94	5	2	6	24	31	19	7	1.196	0.3113	1.5098	2.8515	3.2005	2.3856	1.4289
chi-miR-34b-5p	23	AGGCAGTGTAATTAGCTGATTGT	82	12	2	5	34	21	6	2	2.8703	0.3113	1.2582	4.0396	2.1681	0.7533	0.4083
chi-miR-29b-5p	23	CTGGTTTCACATGGTGGCTTAGA	77	6	0	0	7	14	24	26	1.4352	0.01	0.01	0.8317	1.4454	3.0134	5.3075
chi-miR-128-5p	23	CGGGGCCGTAGCACTGTCTGAGA	67	15	16	0	12	12	12	0	3.5879	2.4901	0.01	1.4257	1.2389	1.5067	0.01
chi-miR-1814	18	GTTTTGTTTGGGTTTGTT	62	11	6	3	14	10	15	3	2.6311	0.9338	0.7549	1.6634	1.0324	1.8834	0.6124
chi-let-7f-3p	22	CTATACAATCTATTGCCTTCCC	60	4	14	8	11	8	7	8	0.9568	2.1789	2.0131	1.3069	0.8259	0.8789	1.6331
chi-miR-876-3p	21	TGGTGGTTTACAAAGTAATTC	55	30	18	7	0	0	0	0	7.1758	2.8014	1.7615	0.01	0.01	0.01	0.01
chi-miR-2318	23	CGTGTATGATGAATTATCTGACC	50	16	5	0	2	5	11	11	3.8271	0.7782	0.01	0.2376	0.5162	1.3811	2.2455
chi-miR-1224	22	GTGAGGACTCGGGAGGTGGAGG	49	23	2	2	15	7	0	0	5.5015	0.3113	0.5033	1.7822	0.7227	0.01	0.01
chi-miR-410-5p	23	CGCCACTTTGGGTACTTGAGGAG	47	3	17	0	10	15	0	2	0.7176	2.6458	0.01	1.1881	1.5487	0.01	0.4083
chi-miR-103-5p	30	AGCTTCTTTACAGTGCTGCCTTGTAGCATT	46	19	2	6	2	7	5	5	4.5447	0.3113	1.5098	0.2376	0.7227	0.6278	1.0207
chi-miR-106a-3p	22	TACTGCAATGCAAGCACTTCTT	44	23	17	0	0	4	0	0	5.5015	2.6458	0.01	0.01	0.413	0.01	0.01
chi-miR-190b	22	TGATATGTTTGATATTGGGTTG	44	8	29	2	2	3	0	0	1.9136	4.5134	0.5033	0.2376	0.3097	0.01	0.01
chi-miR-1468-3p	22	AGCAAAATAAGCAAATGGAAAA	42	0	0	4	9	15	6	8	0.01	0.01	1.0065	1.0693	1.5487	0.7533	1.6331
chi-miR-223-5p	23	TGTGTATTTGACAAGCTGAGTTG	41	6	4	3	4	7	9	8	1.4352	0.6225	0.7549	0.4752	0.7227	1.13	1.6331
chi-miR-491-3p	22	CTTATGCAAGATTCCCTTCTAC	40	6	7	5	5	8	7	2	1.4352	1.0894	1.2582	0.5941	0.8259	0.8789	0.4083
chi-miR-192-3p	23	CTGCCAATTCCATAGGTCACAGG	34	4	4	0	2	15	4	5	0.9568	0.6225	0.01	0.2376	1.5487	0.5022	1.0207
chi-miR-454-5p	21	ACCCTATCGATATTGTCTCTG	32	3	4	3	8	4	6	4	0.7176	0.6225	0.7549	0.9505	0.413	0.7533	0.8165
chi-miR-450-3p	18	ATTGGGAACATTTTGCAT	31	4	7	7	2	9	2	0	0.9568	1.0894	1.7615	0.2376	0.9292	0.2511	0.01
chi-miR-98-3p	22	CTATACAACTTACTACTTTCCC	27	5	0	3	6	4	7	2	1.196	0.01	0.7549	0.7129	0.413	0.8789	0.4083
chi-miR-26a-3p	22	CCTATTCTCGGTTACTTGCACG	23	0	2	8	7	3	3	0	0.01	0.3113	2.0131	0.8317	0.3097	0.3767	0.01
chi-miR-502a	20	ATGCACCTGGACAAGGATTC	21	3	7	0	2	4	5	0	0.7176	1.0894	0.01	0.2376	0.413	0.6278	0.01
chi-miR-876-5p	21	TGGATTTCTTTGTGAATCACC	19	6	2	0	7	4	0	0	1.4352	0.3113	0.01	0.8317	0.413	0.01	0.01
chi-miR-135b-3p	21	ATGTAGGGCTAAAAGCCATGG	18	10	0	0	0	0	3	5	2.3919	0.01	0.01	0.01	0.01	0.3767	1.0207
chi-miR-155-3p	22	CTCCTACATGTTAGCATTAACA	16	2	4	0	2	2	4	2	0.4784	0.6225	0.01	0.2376	0.2065	0.5022	0.4083
chi-miR-451-3p	21	TTTAGTAATGGTAACGGTTCT	15	0	15	0	0	0	0	0	0.01	2.3345	0.01	0.01	0.01	0.01	0.01
chi-miR-329a-5p	19	AATTGGTGGTACTTGAGGA	15	2	4	2	5	2	0	0	0.4784	0.6225	0.5033	0.5941	0.2065	0.01	0.01
chi-miR-29c-3p	21	TAGCACCATTTGAAATTGGTT	15	0	0	0	0	6	4	5	0.01	0.01	0.01	0.01	0.6195	0.5022	1.0207
chi-miR-2404	19	TTGCACTGCATGGTATCTG	15	0	0	0	0	0	0	15	0.01	0.01	0.01	0.01	0.01	0.01	3.062
chi-miR-2411-3p	23	CTGAACTGTCTTACTCCCACATC	14	2	0	6	0	0	2	4	0.4784	0.01	1.5098	0.01	0.01	0.2511	0.8165
chi-miR-204-3p	19	GCTGGGAAGGCAAAGGGAC	14	0	2	2	6	0	0	4	0.01	0.3113	0.5033	0.7129	0.01	0.01	0.8165
chi-miR-543-5p	19	ACCTGTGGTGCTTAAGGAG	13	0	3	5	2	3	0	0	0.01	0.4669	1.2582	0.2376	0.3097	0.01	0.01
chi-miR-1248-5p	20	ACCTTCTTGTATAAGCACTG	13	0	0	2	2	3	0	6	0.01	0.01	0.5033	0.2376	0.3097	0.01	1.2248
chi-miR-33b-3p	21	CAGTGCCTCGGCAGTGCAGCC	9	5	2	0	0	0	2	0	1.196	0.3113	0.01	0.01	0.01	0.2511	0.01
chi-miR-147-3p	18	GTGTGCGGAAATGCTTCT	9	0	0	0	0	2	2	5	0.01	0.01	0.01	0.01	0.2065	0.2511	1.0207
chi-miR-217-3p	21	CATCAGTTCCTCATGCATTGC	9	2	7	0	0	0	0	0	0.4784	1.0894	0.01	0.01	0.01	0.01	0.01
chi-miR-873-3p	22	GAGGCTGATGAGTTCCCGGGAA	8	6	2	0	0	0	0	0	1.4352	0.3113	0.01	0.01	0.01	0.01	0.01
chi-miR-326-5p	20	CCTCGTCTGTCTGTTGGGCT	7	0	0	2	5	0	0	0	0.01	0.01	0.5033	0.5941	0.01	0.01	0.01
chi-miR-363-5p	22	CGGGTGGATCACGATGCAATTT	7	5	2	0	0	0	0	0	1.196	0.3113	0.01	0.01	0.01	0.01	0.01
chi-miR-877-3p	22	TCCTCTTCTCCCTCCTCCCAGG	6	4	2	0	0	0	0	0	0.9568	0.3113	0.01	0.01	0.01	0.01	0.01
chi-miR-449b-5p	22	AGGCAGTGTATTGTTAGCTGGC	5	0	0	0	0	0	5	0	0.01	0.01	0.01	0.01	0.01	0.6278	0.01
chi-miR-346-5p	23	TGTCTGCCCGCATGCCTGCCTCT	5	5	0	0	0	0	0	0	1.196	0.01	0.01	0.01	0.01	0.01	0.01
chi-miR-154a-5p	19	TAGGTTATCCGTGTAGCCT	5	0	0	0	2	3	0	0	0.01	0.01	0.01	0.2376	0.3097	0.01	0.01
chi-miR-2284e	22	AAAACTTGAATGAACTCTTTGG	4	4	0	0	0	0	0	0	0.9568	0.01	0.01	0.01	0.01	0.01	0.01
chi-miR-3958-5p	20	GGTCTGAGATGTTCGAAAGG	4	0	4	0	0	0	0	0	0.01	0.6225	0.01	0.01	0.01	0.01	0.01
chi-miR-202-3p	20	AGAGGTGTAGGGCATGGGAA	4	4	0	0	0	0	0	0	0.9568	0.01	0.01	0.01	0.01	0.01	0.01
chi-miR-147-5p	22	TGGAAACACTTCTGCACAAACT	2	0	0	0	0	0	0	2	0.01	0.01	0.01	0.01	0.01	0.01	0.4083
miR-181-x	23	AACATTCAACGCTGTCGGTGAGT	1072655	67536	81314	69949	267495	259354	222916	104091	16154.2	12655.2	17601.7	31781.5	26776.6	27988.7	21248.4
miR-203-y	22	GTGAAATGTTTAGGACCACTAG	1026159	1910	14799	56912	113425	286120	335881	217112	456.861	2303.22	14321.1	13476.2	29540	42172.2	44319.8
miR-99-x	23	AACCCGTAGATCCGATCTTGTGA	655717	161222	172840	143259	48964	57843	50229	21360	38563.3	26899.7	36049.2	5817.49	5971.91	6306.61	4360.28
miR-205-x	23	TCCTTCATTCCACCGGAGTCTGT	605711	5255	24227	53762	134578	132445	135093	120351	1256.96	3770.54	13528.5	15989.4	13674.1	16961.9	24567.6
miR-152-y	21	TCAGTGCATGACAGAACTTGG	283338	23876	47031	20565	39219	60603	58256	33788	5711	7319.61	5174.9	4659.67	6256.86	7314.45	6897.25
miR-143-y	23	TGAGATGAAGCACTGTAGCTCTT	199896	8885	20388	18030	21907	32754	48966	48966	2125.24	3173.06	4537	2602.81	3381.64	6148.03	9995.58
miR-24-y	23	TGGCTCAGTTCAGCAGGAACAGA	160355	2884	4061	4901	27405	39023	48746	33335	689.836	632.029	1233.27	3256.03	4028.87	6120.4	6804.78
miR-100-x	23	AACCCGTAGATCCGAACTTGTGA	144639	42196	46434	34221	7771	6716	5030	2271	10093	7226.7	8611.25	923.285	693.383	631.552	463.586
miR-127-y	23	TCGGATCCGTCTGAGCTTGGCTT	127337	4485	12708	4611	39483	45225	15033	5792	1072.79	1977.79	1160.3	4691.04	4669.19	1887.5	1182.34
miR-125-x	23	TCCCTGAGACCCTAACTTGTGAA	112680	19473	16707	8766	18777	22291	17110	9556	4657.82	2600.17	2205.84	2230.93	2301.4	2148.28	1950.7
miR-27-y	22	TTCACAGTGGCTAAGTTCCGCT	100885	2606	4174	3526	16210	24396	27550	22423	623.34	649.615	887.27	1925.94	2518.73	3459.1	4577.28
miR-339-x	22	TCCCTGTCCTCCAGGAGCTCAC	94559	19044	24303	15333	10509	11738	8347	5285	4555.21	3782.37	3858.34	1248.59	1211.87	1048.02	1078.84
miR-452-x	22	AACTGTTTGCAGAGGAAACTGA	82823	9349	21575	14034	17851	11525	6379	2110	2236.22	3357.8	3531.46	2120.91	1189.88	800.928	430.721
miR-450-x	23	TTTTGCAACATGTTCCTGAATAT	78368	8927	16191	12269	16747	12790	8742	2702	2135.28	2519.87	3087.33	1989.74	1320.48	1097.62	551.568
miR-23-y	24	ATCACATTGCCAGGGATTACCACT	76443	2300	3792	4637	13872	15826	21383	14633	550.146	590.163	1166.84	1648.16	1633.93	2684.79	2987.08
let-7-x	24	TGAGGTAGTAGGTTGTGTGGTTTT	69251	560	2354	1934	16559	20677	16222	10945	133.949	366.362	486.665	1967.4	2134.77	2036.79	2234.24
miR-452-y	22	TCAGTCTCATCTGCAAAGAAGT	66537	2751	5919	3370	23277	18008	8919	4293	658.023	921.196	848.014	2765.58	1859.21	1119.84	876.344
miR-101-y	22	TACAGTACTGTGATAACTGAAT	65797	4876	4990	3468	9390	15953	15099	12021	1166.31	776.612	872.675	1115.64	1647.04	1895.79	2453.88
miR-126-y	23	TCGTACCGTGAGTAATAATGCGA	63976	833	1370	842	8275	17312	17895	17449	199.249	213.218	211.878	983.167	1787.35	2246.84	3561.92
miR-424-x	23	CAGCAGCAATTCATGTTTTGAAA	57536	4174	4695	5889	11455	15312	12422	3589	998.396	730.7	1481.89	1360.99	1580.86	1559.67	732.634
miR-2284-x	22	TGAAAAGTTCGTTCGGGTTTTT	56617	1976	2870	2221	14416	14547	13277	7310	472.647	446.669	558.884	1712.79	1501.88	1667.02	1492.21
miR-503-x	23	TAGCAGCGGGAACAGTACTGCAG	51756	10516	14952	6878	8672	6805	3231	702	2515.36	2327.04	1730.75	1030.33	702.572	405.675	143.302
miR-142-y	23	TGTAGTGTTTCCTACTTTATGGA	51654	462	372	296	8589	11372	12603	17960	110.508	57.8958	74.4844	1020.47	1174.08	1582.4	3666.23
miR-200-y	24	TAATACTGCCTGGTAATGATGACT	40369	603	1552	3930	5688	8471	12487	7638	144.234	241.544	988.931	675.801	874.576	1567.83	1559.17
miR-10-x	24	TACCCTGTAGAACCGAATTTGTGA	40229	10230	6933	8974	5172	4256	2802	1862	2446.95	1079.01	2258.18	614.494	439.404	351.811	380.096
miR-486-x	23	TCCTGTACTGAGCTGCCCCGAGT	40134	7745	20869	4859	2239	2565	828	1029	1852.56	3247.92	1222.7	266.019	264.82	103.961	210.053
miR-199-y	24	TACAGTAGTCTGCACATTGGTTAA	39422	2067	2926	2189	11002	9467	7676	4095	494.414	455.384	550.832	1307.17	977.406	963.776	835.925
miR-299-y	22	TATGTGGGACGGTAAACCGCTT	31737	3866	10951	2677	5794	6105	1690	654	924.724	1704.35	673.63	688.395	630.301	212.191	133.503
miR-370-y	22	GCCTGCTGGGGTGGAACCTGGT	31722	4768	12019	3164	5992	3836	1576	367	1140.48	1870.56	796.177	711.919	396.042	197.878	74.9169
miR-185-x	22	TGGAGAGAAAGGCAGTTCCTGA	31049	558	1085	822	6339	7801	9565	4879	133.47	168.863	206.845	753.147	805.402	1200.95	995.966
miR-379-x	23	TGGTAGACTATGGAACGTAGGAA	30898	1106	2134	1266	8059	9230	6402	2701	264.549	332.122	318.572	957.503	952.937	803.816	551.364
miR-214-y	22	ACAGCAGGCACAGACAGGCAGA	30188	4544	4599	2665	6506	6294	3116	2464	1086.9	715.76	670.611	772.989	649.814	391.236	502.984
miR-210-z	22	CTGTGCGTGTGACAGCGGCTGA	28775	1404	1297	1435	6559	7037	6953	4090	335.828	201.857	361.098	779.286	726.524	872.998	834.905
miR-542-y	23	TGTGACAGATTGATAACTGAAAA	28511	2018	3541	2113	6740	7782	4981	1336	482.693	551.099	531.708	800.791	803.441	625.4	272.722
miR-6119-x	23	AGAGGTAAAAAATTGATTTGACT	26048	1175	1404	1077	5083	5251	7825	4233	281.053	218.51	271.012	603.92	542.131	982.484	864.096
miR-374-x	23	TTATAATACAACCTGATAAGTGA	25847	1275	1140	772	5617	6380	6339	4324	304.972	177.423	194.263	667.365	658.693	795.906	882.672
miR-26-x	22	TTCAAGTAATCCAGGATAGGAA	25327	1131	2814	1786	4236	5989	5196	4175	270.528	437.953	449.423	503.286	618.325	652.394	852.256
miR-199-x	23	CTTAGTGTTCAGACTACCTGTTC	24464	1186	2325	1404	7413	6028	4264	1844	283.684	361.848	353.297	880.751	622.352	535.375	376.422
miR-30-x	23	TGTAAACATCCCCGACTGGAAGT	24340	2489	3782	2053	3288	5545	4132	3051	595.354	588.607	516.609	390.653	572.485	518.802	622.81
miR-2285-y	22	AAAAAACCGAGTGAACTTTTTG	23685	5811	6483	4552	2031	2098	1814	896	1389.96	1008.97	1145.45	241.306	216.605	227.761	182.903
miR-484-z	22	TCAGGCTCAGTCCCCTCCCGAT	21269	2976	4078	2496	4418	3138	2799	1364	711.841	634.674	628.084	524.91	323.978	351.434	278.438
miR-2779-z	19	TTTCCGGCTCGAAGGACCA	19937	302	337	185	610	1236	1513	15754	72.2366	52.4486	46.5527	72.4751	127.609	189.968	3215.91
miR-320-y	24	AAAAGCTGGGTTGAGAGGGCGAAT	19493	1422	1721	1650	3913	4635	3679	2473	340.134	267.846	415.2	464.91	478.534	461.924	504.821
miR-92-y	24	TATTGCACTTGTCCCGGCCTGTAT	18818	2959	2439	1681	4031	3218	2812	1678	707.775	379.591	423.001	478.93	332.238	353.067	342.536
miR-218-x	23	TTGTGCTTGATCTAACCATGTGA	18647	3305	1970	808	4818	3069	2954	1723	790.536	306.599	203.322	572.435	316.854	370.896	351.721
miR-4334-y	20	TCCCTGTCCTCCAGGAGCTC	17448	4499	5400	3219	1346	1360	1076	548	1076.13	840.422	810.017	159.921	140.411	135.099	111.865
miR-652-y	22	AATGGCGCCACTAGGGTTGTGT	17070	960	1269	529	2609	3713	4976	3014	229.626	197.499	133.116	309.98	383.343	624.772	615.257
miR-2478-y	22	TCGTATCCCACTTCTGACACCA	16922	420	513	298	2364	2181	3273	7873	100.462	79.8401	74.9876	280.871	225.174	410.948	1607.14
miR-574-y	22	CACGCTCATGCACACACCCACA	16520	1799	3069	1465	3271	3154	2348	1414	430.31	477.64	368.647	388.633	325.63	294.808	288.644
miR-411-x	22	TAGTAGACCGTATAGCGTACGT	15535	1211	3979	1347	2456	3787	1735	1020	289.664	619.267	338.954	291.801	390.983	217.841	208.216
miR-3431-x	23	CTCAGTCAGCCTTGTGGATGTAA	13606	189	418	322	6199	2808	2537	1133	45.2077	65.0549	81.0269	736.514	289.908	318.538	231.283
miR-16-x	23	TAGCAGCACGTAAATATTGGAAA	13410	311	284	371	2656	3401	3487	2900	74.3893	44.2	93.3571	315.564	351.131	437.817	591.986
miR-4454-x	22	TCGAATCCGAGTCACGGCACCA	13386	1940	2615	1686	1619	1610	1601	2315	464.036	406.982	424.259	192.356	166.222	201.017	472.568
miR-299-x	22	TGGTTTACCGTCCCACATACAT	13306	523	1477	417	3624	5177	1255	833	125.099	229.871	104.932	430.574	534.491	157.574	170.043
miR-148-y	24	TCAGTGCACTACAGAACTTTGTAA	12953	825	2309	1501	2326	2651	2255	1086	197.335	359.358	377.706	276.356	273.699	283.131	221.689
miR-221-y	24	AGCTACATTGTCTGCTGGGTTTCT	12795	1215	1682	3476	1532	1863	1760	1267	290.621	261.776	874.688	182.019	192.343	220.98	258.637
miR-32-x	22	TATTGCACATTACTAAGTTGCA	12743	1451	977	710	1949	2796	3078	1782	347.07	152.054	178.662	231.564	288.669	386.465	363.765
miR-6238-y	20	TTAGTCAGCGGAGGAAAAGA	12636	6	10	34	37	53	138	12358	1.4352	1.5563	8.5556	4.396	5.4719	17.3269	2522.68
miR-151-y	23	CTAGACTGAAGCTCCTTGAGGAA	11833	611	845	634	2774	2589	2677	1703	146.148	131.511	159.537	329.584	267.297	336.116	347.639
miR-142-x	21	CATAAAGTAGAAAGCACTACT	11137	662	884	583	1296	2107	2428	3177	158.346	137.58	146.704	153.98	217.534	304.853	648.531
miR-31-x	21	AGGCAAGATGCTGGCATAGCT	10729	470	484	257	884	640	2604	5390	112.421	75.3267	64.6705	105.029	66.0758	326.951	1100.28
miR-769-x	22	TGAGACCTCCGGGTTCTGAGCT	10704	1541	1955	1241	1784	1752	1534	897	368.598	304.264	312.281	211.96	180.883	192.605	183.107
miR-130-y	23	CAGTGCAATGTTAAAAGGGCATA	10064	256	262	221	2878	2634	2603	1210	61.2337	40.776	55.6116	341.94	271.943	326.825	247.001
miR-429-y	23	TAATACTGTCTGGTAATGCCGTA	9704	57	91	160	1486	2193	3727	1990	13.6341	14.1627	40.2618	176.554	226.413	467.951	406.225
miR-107-y	23	AGCAGCATTGTACAGGGCTATCT	9612	222	251	263	1940	2483	2871	1582	53.1011	39.0641	66.1804	230.495	256.354	360.474	322.939
miR-3613-x	22	TGTTGTACTTTTTTTTTTGTTC	9452	3680	3457	1787	103	181	126	118	880.234	538.026	449.674	12.2376	18.6871	15.8202	24.0877
miR-181-y	22	ACCATCGACCGTTGATTGTACC	8503	1096	905	826	1884	1897	1191	704	262.157	140.849	207.852	223.841	195.853	149.538	143.71
miR-193-x	22	TGGGTCTTTGCGGGCGAGATGA	8425	14	26	22	559	2209	3005	2590	3.3487	4.0465	5.536	66.4157	228.065	377.299	528.705
miR-125-y	24	ACAAGTCAGGCTCTTGGGACCTTT	7875	758	1091	498	1659	1728	1364	777	181.309	169.796	125.315	197.109	178.405	171.26	158.612
miR-196-x	23	TAGGTAGTTTCCTGTTGTTGGGT	7553	1165	328	156	2720	1336	1695	153	278.661	51.0479	39.2553	323.168	137.933	212.819	31.2324
miR-6123-x	23	TGCCAAGCCCACGTTCAAAGGCT	7308	1947	2305	666	771	689	609	321	465.711	358.736	167.59	91.6038	71.1348	76.4643	65.5267
miR-450-y	22	ATCGGGAACATTTTGCATCCAT	7205	814	1159	853	1626	1582	825	346	194.704	180.38	214.646	193.188	163.331	103.585	70.6301
miR-665-y	24	ACCAGTAGGCCGAGGCCCCTCACT	6961	962	2469	623	1243	965	552	147	230.105	384.26	156.769	147.683	99.63	69.3075	30.0076
miR-106-x	23	TAAAGTGCTGACAGTGCAGATAA	6804	1280	1126	720	1069	1000	1051	558	306.168	175.244	181.178	127.01	103.243	131.96	113.906
miR-1260-x	18	ATCCCACCGCTGCCACCA	6671	1718	1830	962	195	175	230	1561	410.935	284.81	242.074	23.1683	18.0676	28.8781	318.652
miR-22-y	22	AAGCTGCCAGTTGAAGAACTGC	6249	135	202	173	971	1349	1874	1545	32.2912	31.438	43.5331	115.366	139.275	235.294	315.386
miR-21-x	24	TAGCTTATCAGACTGATGTTGAAA	6024	325	1043	815	848	1176	1132	685	77.738	162.326	205.084	100.752	121.414	142.131	139.831
miR-409-y	23	GAATGTTGCTCGGTGAACCCCTA	5952	476	1021	402	2335	1091	500	127	113.856	158.902	101.158	277.425	112.639	62.7785	25.9249
miR-141-y	24	TAACACTGTCTGGTAAAGATGGCT	5926	24	81	175	946	1610	1789	1301	5.7407	12.6063	44.0364	112.396	166.222	224.622	265.577
miR-375-y	22	TTTGTTCGTTCGGCTCGCGTGA	5909	1307	2103	923	708	411	222	235	312.627	327.298	232.26	84.1187	42.4331	27.8737	47.9713
miR-103-y	25	AGCAGCATTGTACAGGGCTATGATT	5763	201	214	254	1185	1507	1594	808	48.078	33.3056	63.9156	140.792	155.588	200.138	164.94
miR-431-x	21	TGTCTTGCAGGCCGTCATGCA	5736	1343	2433	202	901	699	138	20	321.238	378.657	50.8305	107.049	72.1672	17.3269	4.0827
miR-378-y	23	ACTGGACTTGGAGTCAGAAGGAA	5478	98	424	345	2011	1485	766	349	23.441	65.9887	86.8145	238.93	153.317	96.1767	71.2425
miR-140-y	23	ACCACAGGGTAGAACCACGGAAT	5014	1854	2147	81	296	290	206	140	443.466	334.146	20.3825	35.1683	29.9406	25.8648	28.5786
miR-376-y	22	ATCATAGAGGAAAATCCATGTA	4790	197	464	237	1397	1390	769	336	47.1212	72.2141	59.6378	165.98	143.508	96.5534	68.5887
miR-2484-y	22	GAGCTGTGATGACTTCGATTGC	4770	36	49	19	89	126	90	4361	8.611	7.6261	4.7811	10.5742	13.0087	11.3001	890.225
miR-744-x	22	TGCGGGGCTAGGGCTAACAGCA	4508	216	208	99	1274	1098	1118	495	51.6659	32.3718	24.912	151.366	113.361	140.373	101.046
miR-322-x	20	CAGCAGCAATTCATGTTTGA	4393	4	12	16	1143	1599	1249	370	0.9568	1.8676	4.0262	135.802	165.086	156.821	75.5293
miR-574-x	23	TGAGTGTGTGTGTGTGAGTGTGT	4384	497	608	236	1197	986	547	313	118.879	94.6253	59.3862	142.218	101.798	68.6797	63.8937
miR-615-y	21	TCCGAGCCTGGGTCTCCCTCT	4361	655	563	341	1544	601	454	203	156.672	87.6218	85.808	183.445	62.0493	57.0029	41.439
miR-9226-y	22	TCAGGTCCCTGTTCGGGCGCCA	4350	313	262	173	968	821	922	891	74.8677	40.776	43.5331	115.01	84.7629	115.764	181.883
miR-3535-x	26	TGGATATGATGACTGATTATCTGAGA	4210	629	770	658	544	673	377	559	150.453	119.838	165.577	64.6335	69.4829	47.335	114.11
miR-502-y	23	ATGCACCTGGGCAAGGATTCTGT	4186	585	1585	562	533	497	275	149	139.929	246.679	141.42	63.3266	51.312	34.5282	30.4158
miR-500-y	23	ATGCACCTGGGCAAGGATTCTGT	4132	578	1555	555	531	495	269	149	138.254	242.011	139.658	63.089	51.1055	33.7749	30.4158
miR-151-x	23	TCGAGGAGCTCACAGTCTAGTAA	4041	434	702	445	678	716	696	370	103.81	109.255	111.978	80.5543	73.9223	87.3877	75.5293
miR-1386-x	19	GCTCCTGGCTGGCTCGCCA	3665	42	58	34	283	470	700	2078	10.0461	9.0268	8.5556	33.6237	48.5244	87.8899	424.189
miR-3957-y	22	ACGCACAGCACCTCACTGAGCT	3587	256	631	132	995	1047	392	134	61.2337	98.2049	33.216	118.218	108.096	49.2184	27.3538
miR-541-x	25	AAAGGATTCTGCTGTCGGTCCCACT	3564	495	1090	256	668	680	256	119	118.401	169.641	64.4189	79.3662	70.2056	32.1426	24.2918
miR-503-y	23	GGAGTATTGTTTCTGCTGCCCGG	3354	286	629	494	803	712	332	98	68.4095	97.8936	124.308	95.4058	73.5094	41.6849	20.0051
miR-149-x	23	TCTGGCTCCGTGTCTTCACTCCC	3208	222	183	128	1059	668	607	341	53.1011	28.481	32.2095	125.822	68.9666	76.2131	69.6094
miR-331-y	22	CCCCTGGGCCTATCCTAGAATT	3142	55	64	37	878	920	782	406	13.1557	9.9606	9.3105	104.317	94.984	98.1856	82.8781
miR-1277-x	21	TATATATATATATGTACGTAT	3095	86	102	38	867	1013	690	299	20.5707	15.8746	9.5622	103.01	104.586	86.6344	61.0358
miR-493-y	24	TGAAGGTCTACTGTGTGCCAGGTT	3060	290	715	274	644	732	287	118	69.3663	111.278	68.9484	76.5147	75.5742	36.0349	24.0877
miR-6529-x	21	GAGAGATCAGAGGCGCAGAGT	2894	363	383	139	679	614	431	285	86.8274	59.6077	34.9774	80.6731	63.3915	54.1151	58.178
miR-1983-y	21	CTCACCTGGAGCATGTTTTCT	2841	514	499	237	365	244	514	468	122.946	77.6612	59.6378	43.3663	25.1914	64.5363	95.5343
miR-186-x	22	CAAAGAATTCTCCTTTTGGGAA	2793	290	486	411	391	439	426	350	69.3663	75.638	103.422	46.4554	45.3239	53.4873	71.4466
miR-3968-y	22	TCGAATCCCACTCCTGACACCA	2714	133	215	83	273	304	568	1138	31.8128	33.4613	20.8858	32.4356	31.386	71.3164	232.304
miR-20-x	25	TAAAGTGCTTATAGTGCAGGTAGAA	2649	194	165	98	454	571	737	430	46.4036	25.6796	24.6604	53.9405	58.952	92.5356	87.7773
miR-411-y	22	TATGTAACACGGTCCACTAATT	2630	416	853	298	482	409	135	37	99.5047	132.756	74.9876	57.2672	42.2266	16.9502	7.5529
miR-342-y	24	TCTCACACAGAAATCGCACCCATT	2628	303	333	207	670	497	360	258	72.4758	51.826	52.0887	79.6038	51.312	45.2005	52.6664
miR-15-x	23	TAGCGGCACATAATGGTTTGTGA	2617	50	42	31	451	682	773	588	11.9597	6.5366	7.8007	53.5841	70.4121	97.0556	120.03
miR-381-y	23	TATGCAAGGGCAAGCTCTCTGTT	2606	184	943	207	427	671	102	72	44.0117	146.763	52.0887	50.7326	69.2764	12.8068	14.6976
miR-423-y	25	AGCTCGGTCTGAGGCCCCTCAGTAA	2598	105	163	147	729	568	617	269	25.1154	25.3683	36.9905	86.6137	58.6423	77.4687	54.9118
miR-136-x	24	ACTCCATTTGTTTTGATGATGGAA	2475	7	38	24	742	1084	418	162	1.6744	5.9141	6.0393	88.1583	111.916	52.4829	33.0696
miR-432-x	24	TCTTGGAGTAGGTCATTGGGTGTT	2367	247	499	112	573	680	169	87	59.0809	77.6612	28.1833	68.0791	70.2056	21.2191	17.7596
miR-183-x	23	ATGGCACTGGTAGAATTCACTGA	2344	651	344	766	201	178	156	48	155.715	53.538	192.753	23.8811	18.3773	19.5869	9.7984
miR-335-x	23	TCAAGAGCAATAACGAAAAATGA	2296	378	562	247	402	461	179	67	90.4153	87.4662	62.1542	47.7623	47.5952	22.4747	13.6769
miR-133-y	24	TTTGGTCCCCTTCAACCAGCTATT	2272	379	1093	256	160	304	5	75	90.6545	170.108	64.4189	19.0099	31.386	0.6278	15.31
miR-193-y	22	AACTGGCCTACAAAGTCCCAGT	2258	40	67	49	180	537	765	620	9.5678	10.4275	12.3302	21.3861	55.4417	96.0512	126.563
miR-34-x	24	TGGCAGTGTCTTAGCTGGTTGTTT	2253	21	28	37	352	637	616	562	5.0231	4.3577	9.3105	41.8217	65.7661	77.3432	114.723
miR-124-y	23	TAAGGCACGCGGTGAATGCCAAT	2229	2197	12	2	3	11	4	0	525.509	1.8676	0.5033	0.3564	1.1357	0.5022	0.01
miR-1384-y	19	TGCAATTTTTGGAAAAAAG	2205	2	2	2	18	81	974	1126	0.4784	0.3113	0.5033	2.1386	8.3627	122.293	229.854
miR-93-x	24	CAAAGTGCTGTTCGTGCAGGTAAA	2162	114	89	62	431	530	563	373	27.2681	13.8514	15.6015	51.2078	54.719	70.6886	76.1417
miR-7977-x	18	TTCCCGGCCAATGCACCA	2013	405	648	309	199	97	222	133	96.8736	100.851	77.7556	23.6435	10.0146	27.8737	27.1497
miR-210-y	23	ACTGTGCGTGTGACAGCGGCTGA	1985	68	60	73	418	449	550	367	16.2652	9.338	18.3695	49.6633	46.3563	69.0564	74.9169
miR-139-x	23	TCTACAGTGCACGTGTCTCCAGT	1962	441	473	173	191	262	230	192	105.485	73.6148	43.5331	22.693	27.0498	28.8781	39.1936
miR-28-y	24	CACTAGATTGAGAGCTCCTGGAAT	1943	93	230	119	481	367	397	256	22.245	35.7958	29.9447	57.1484	37.8904	49.8462	52.2581
miR-539-y	23	AATCATACAAGGACAATTTCTTT	1940	406	923	275	152	132	36	16	97.1128	143.65	69.2	18.0594	13.6281	4.5201	3.2661
miR-2440-y	21	GTTCAGTGATGAGACCCTGGA	1925	18	24	7	56	66	114	1640	4.3055	3.7352	1.7615	6.6535	6.8141	14.3135	334.778
miR-1271-x	22	CTTGGCACCTAGTAAGTACTCT	1874	490	514	269	173	178	183	67	117.205	79.9957	67.6902	20.5544	18.3773	22.9769	13.6769
miR-6519-y	20	TAGCAGCGGGAACAGTAAAA	1860	12	26	37	473	662	477	173	2.8703	4.0465	9.3105	56.1979	68.3472	59.8907	35.315
miR-187-y	23	TCGTGTCTTGTGTTGCAGCCGGT	1838	19	13	45	648	458	473	182	4.5447	2.0232	11.3236	76.99	47.2855	59.3885	37.1522
miR-192-x	23	CTGACCTATGAATTGACAGCCAT	1836	366	273	133	291	308	291	174	87.545	42.488	33.4676	34.5742	31.799	36.5371	35.5192
miR-28-x	23	AAGGAGCTCACAGTCTATTGAGA	1809	450	525	493	74	102	97	68	107.637	81.7077	124.057	8.7921	10.5308	12.179	13.8811
miR-136-y	22	TCATCGTCTCAAATGAGTCTTT	1798	266	818	292	131	205	54	32	63.6256	127.308	73.4778	15.5643	21.1649	6.7801	6.5323
miR-9-z	23	TAAAGCTAGATAACCGAAAGTAA	1739	1681	27	4	9	18	0	0	402.085	4.2021	1.0065	1.0693	1.8584	0.01	0.01
miR-532-x	24	CATGCCTTGAGTGTAGGACCGTTT	1715	275	513	163	261	291	143	69	65.7783	79.8401	41.0167	31.0098	30.0439	17.9547	14.0852
miR-1247-x	22	ACCCGTCCCGTGCGTCCCCGGA	1682	14	3	0	0	36	876	753	3.3487	0.4669	0.01	0.01	3.7168	109.988	153.712
miR-708-x	24	AAGGAGCTTACAATCTAGCTGGAA	1638	134	114	88	230	415	404	253	32.052	17.7422	22.144	27.3267	42.846	50.7251	51.6457
miR-2387-x	22	TGGAAGGCCTGGCTTTGCAGCG	1634	219	278	161	306	295	275	100	52.3835	43.2662	40.5134	36.3564	30.4568	34.5282	20.4133
miR-7550-x	18	TTCCGGCTCGAAGGACCA	1618	162	160	94	101	92	302	707	38.7494	24.9014	23.6538	12	9.4984	37.9182	144.322
miR-1-y	23	TGGAATGTAAAGAAGTATGTACC	1606	38	279	97	151	430	81	530	9.0894	43.4218	24.4087	17.9406	44.3947	10.1701	108.191
miR-369-y	22	CAATAATACATGGTTGATCTTT	1594	204	733	218	179	134	91	35	48.7956	114.079	54.8567	21.2673	13.8346	11.4257	7.1447
miR-195-x	22	TAGCAGCACAGAAATGTTGGTT	1564	0	0	4	51	360	599	550	0.01	0.01	1.0065	6.0594	37.1677	75.2087	112.273
miR-127-x	25	CTGAAGCTCAGAGGGCTCTGATTTT	1548	112	256	111	353	512	153	51	26.7897	39.8422	27.9316	41.9405	52.8607	19.2102	10.4108
miR-6119-y	21	CAAATCATTTTTTACTCTCCA	1479	368	291	251	153	158	132	126	88.0234	45.2894	63.1607	18.1782	16.3125	16.5735	25.7208
miR-409-x	25	AGGTTACCCGAGCAACTTTGCATCA	1461	242	900	267	26	20	4	2	57.8849	140.07	67.1869	3.0891	2.0649	0.5022	0.4083
miR-29-y	23	TAGCACCATTTGAAATCGGTTAA	1453	18	20	10	120	273	385	627	4.3055	3.1127	2.5164	14.2574	28.1855	48.3395	127.992
miR-19-y	25	TGTGCAAATCTATGCAAAACTGATT	1446	334	420	383	110	77	77	45	79.8908	65.3662	96.3767	13.0693	7.9497	9.6679	9.186
miR-106-y	23	CCGCACTGTGGGTACTTGCTGCA	1418	96	177	75	398	315	206	151	22.9626	27.5472	18.8727	47.287	32.5217	25.8648	30.8241
miR-206-y	24	TGGAATGTAAGGAAGTGTGTGGAA	1402	169	588	58	131	394	9	53	40.4238	91.5126	14.5949	15.5643	40.6779	1.13	10.8191
miR-128-y	23	TCACAGTGAACCGGTCTCTTTAA	1401	184	288	79	286	288	182	94	44.0117	44.8225	19.8793	33.9801	29.7341	22.8514	19.1885
miR-30-y	23	CTTTCAGTCGGATGTTTACAGTT	1393	100	135	68	351	305	271	163	23.9194	21.0106	17.1113	41.7029	31.4893	34.026	33.2737
miR-507-y	22	TGATTGGTACTTCTTAGAGTGA	1377	81	120	136	496	285	207	52	19.3747	18.676	34.2225	58.9306	29.4244	25.9903	10.6149
miR-2887-x	21	GGGACCGGGGTCCGGTGCGGA	1371	11	22	13	133	231	389	572	2.6311	3.4239	3.2713	15.802	23.8492	48.8417	116.764
miR-1307-x	23	TCGACCGGACCTCGACCGGCTCT	1356	78	89	23	390	346	310	120	18.6571	13.8514	5.7876	46.3365	35.7222	38.9227	24.496
miR-25-y	24	CATTGCACTTGTCTCGGTCTGAAT	1314	171	199	115	249	253	180	147	40.9022	30.9711	28.9382	29.5841	26.1206	22.6003	30.0076
miR-182-x	26	TTTGGCAATGGTAGAACTCACACTGT	1264	282	95	164	242	200	195	86	67.4527	14.7852	41.2684	28.7524	20.6487	24.4836	17.5555
miR-205-y	22	GATTTCAGTGGAGTGAAGCTCA	1236	8	87	216	195	204	357	169	1.9136	13.5401	54.3534	23.1683	21.0617	44.8239	34.4985
miR-1839-x	23	AAGGTAGATAGAACAGGTCTTGA	1226	51	89	68	227	295	317	179	12.1989	13.8514	17.1113	26.9702	30.4568	39.8016	36.5398
miR-145-x	25	GTCCAGTTTTCCCAGGAATCCCTTT	1219	72	192	191	198	160	194	212	17.222	29.8817	48.0625	23.5247	16.519	24.3581	43.2762
miR-487-y	22	TCGTACAGGGTCATCCACTTTA	1173	144	423	169	189	165	65	18	34.4439	65.8331	42.5265	22.4554	17.0352	8.1612	3.6744
miR-6240-x	20	GCATCGCGAAGGCCCGCGGC	1142	18	29	41	22	72	38	922	4.3055	4.5134	10.3171	2.6139	7.4335	4.7712	188.211
miR-126-x	23	CATTATTACTTTTGGTACGCGAA	1141	57	149	57	85	215	253	325	13.6341	23.1894	14.3433	10.099	22.1973	31.7659	66.3433
miR-324-y	24	CCACTGCCCCAGGTGCTGCTGGAA	1136	35	58	18	279	297	288	161	8.3718	9.0268	4.5295	33.1485	30.6633	36.1604	32.8654
miR-760-y	22	CGGCTCTGGGTCTGTGGGGAGT	1107	129	159	84	259	226	146	104	30.856	24.7458	21.1375	30.7722	23.333	18.3313	21.2298
miR-1-z	23	CTGGAATGTAAAGAAGTATGTAT	1104	102	817	65	20	76	3	21	24.3978	127.153	16.3564	2.3762	7.8465	0.3767	4.2868
miR-3959-y	24	TGTATGTCAACTGATCCACAGTAA	1098	129	225	116	337	190	82	19	30.856	35.0176	29.1898	40.0395	19.6163	10.2957	3.8785
miR-296-y	24	AGGGTTGGGCGGAGGCTTTCCTTT	1098	29	34	17	433	264	216	105	6.9366	5.2915	4.2778	51.4455	27.2563	27.1203	21.434
miR-7134-y	22	GATGCGGAACCTGCGGATACGG	1029	10	20	11	286	251	253	198	2.3919	3.1127	2.768	33.9801	25.9141	31.7659	40.4184
miR-424-y	23	CAAAACGTGAGGCGCTGCTATAA	1018	25	57	49	341	276	224	46	5.9798	8.8711	12.3302	40.5148	28.4952	28.1248	9.3901
miR-378-x	23	ACTGGACTTGGAGTCAGAAGGAT	997	11	116	66	356	274	97	77	2.6311	18.0535	16.608	42.297	28.2887	12.179	15.7183
miR-494-y	25	TGAAACATACACGGGAAACCTCTAA	949	174	511	217	21	18	6	2	41.6198	79.5288	54.6051	2.495	1.8584	0.7533	0.4083
miR-362-x	26	AATCCTTGGAACCTAGGTGTGAGTGT	942	198	421	141	75	53	42	12	47.3604	65.5218	35.4807	8.9109	5.4719	5.2734	2.4496
miR-4448-y	20	GGCTCGTTCGTCTAGGGGTA	937	3	0	0	31	34	41	828	0.7176	0.01	0.01	3.6832	3.5103	5.1478	169.022
miR-188-x	23	CATCCCTTGCATGGTGGAGGGTT	912	81	97	24	236	255	166	53	19.3747	15.0965	6.0393	28.0396	26.3271	20.8425	10.8191
miR-138-x	23	AGCTGGTGTTGTGAATCAGGCCG	898	421	110	20	58	114	86	89	100.701	17.1197	5.0327	6.8911	11.7698	10.7979	18.1679
miR-379-y	22	TATGTAACACGGTCCACTAATT	896	156	335	122	87	149	35	12	37.3143	52.1373	30.6996	10.3366	15.3833	4.3945	2.4496
miR-6131-y	20	GGCTGGTCCGATGGTAGTGG	895	0	6	3	46	56	64	720	0.01	0.9338	0.7549	5.4653	5.7816	8.0357	146.976
miR-24-x	24	GTGCCTACTGAGCTGAAACACAGT	891	125	155	181	71	106	153	100	29.8992	24.1232	45.5462	8.4356	10.9438	19.2102	20.4133
miR-497-y	22	CAAACCACACTGTGGTGTTGGA	884	0	0	0	24	221	322	317	0.01	0.01	0.01	2.8515	22.8168	40.4294	64.7102
miR-194-x	24	TGTAACAGCAACTCCATGTGGAAA	882	167	142	47	119	155	160	92	39.9454	22.1	11.8269	14.1386	16.0027	20.0891	18.7803
miR-9851-y	22	TGGCACCAGCACTGGCGGTGGC	882	167	106	38	172	196	152	51	39.9454	16.4972	9.5622	20.4356	20.2357	19.0847	10.4108
miR-146-x	26	TGAGAACTGAATTCCATAGGCTGTTT	855	48	150	140	10	25	297	185	11.4813	23.3451	35.2291	1.1881	2.5811	37.2904	37.7646
lin-4-x	21	TCCCTGAGACCTAACTTGTGA	854	6	9	2	250	265	196	126	1.4352	1.4007	0.5033	29.7029	27.3595	24.6092	25.7208
miR-547-y	22	TGATTGGTACTTCTTAGAGTGA	851	37	70	58	329	184	137	36	8.8502	10.8944	14.5949	39.089	18.9968	17.2013	7.3488
miR-758-y	22	TTTGTGACCTGGTCCACTAAAA	835	118	330	51	158	121	50	7	28.2249	51.3591	12.8335	18.7722	12.4925	6.2779	1.4289
miR-1298-x	22	TTCATTCGGCTGTCCAGATGTA	831	312	191	66	88	111	40	23	74.6285	29.726	16.608	10.4554	11.46	5.0223	4.6951
miR-98-x	20	TGAGGTAGTAGGTTGTATTT	818	8	43	19	161	289	172	126	1.9136	6.6923	4.7811	19.1287	29.8374	21.5958	25.7208
miR-3956-x	23	GTACGTGGATGCTGAAGGTCAGA	816	72	237	43	128	237	58	41	17.222	36.8852	10.8204	15.2079	24.4687	7.2823	8.3695
miR-361-x	23	TTATCAGAATCTCCAGGGGTAAA	808	19	82	35	208	201	174	89	4.5447	12.762	8.8073	24.7128	20.7519	21.8469	18.1679
miR-224-x	24	CAAGTCACTAGTGGTTCCGTTTAA	784	44	97	87	252	141	97	66	10.5245	15.0965	21.8924	29.9405	14.5573	12.179	13.4728
miR-296-x	21	GAGGGCCCCCCCCAATCCTGA	768	32	76	24	212	202	129	93	7.6542	11.8282	6.0393	25.1881	20.8552	16.1969	18.9844
miR-735-x	19	GGCTGGTCCGAAGGTAGTG	737	11	0	0	25	25	41	635	2.6311	0.01	0.01	2.9703	2.5811	5.1478	129.625
miR-2284-y	22	AAAACTTGAATGAACTTTCTGG	713	137	235	127	43	55	80	36	32.7696	36.5739	31.9578	5.1089	5.6784	10.0446	7.3488
miR-376-x	24	GTAGATTCTCCTTCTATGAGTACT	711	116	275	60	106	104	36	14	27.7465	42.7993	15.0982	12.594	10.7373	4.5201	2.8579
miR-203-x	22	AGTGGTTCTTAACAGTTCAACA	700	0	12	47	66	200	219	156	0.01	1.8676	11.8269	7.8416	20.6487	27.497	31.8448
miR-2355-y	21	TGTCCTTGCTGTTTGGAGATA	685	77	117	62	109	117	120	83	18.4179	18.2091	15.6015	12.9505	12.0795	15.0668	16.9431
miR-2137-y	20	GCCGGCGGGAGCCCCGGGGA	685	12	28	2	21	41	145	436	2.8703	4.3577	0.5033	2.495	4.233	18.2058	89.0021
miR-96-x	23	TTTGGCACTAGCACATTTTTGCA	681	96	32	162	91	151	112	37	22.9626	4.9803	40.7651	10.8119	15.5898	14.0624	7.5529
miR-191-x	24	CAACGGAATCCCAAAAGCAGCTGA	670	39	140	71	131	94	113	82	9.3286	21.7887	17.8662	15.5643	9.7049	14.1879	16.7389
miR-33-x	22	GTGCATTGTAGTTGCATTGCAA	666	4	0	4	219	211	152	76	0.9568	0.01	1.0065	26.0198	21.7844	19.0847	15.5141
miR-9277-y	22	TCGAATCCTGCCGACTACGCCA	653	25	51	17	95	128	163	174	5.9798	7.9373	4.2778	11.2871	13.2152	20.4658	35.5192
miR-423-x	25	TGAGGGGCAGAGAGCGAGACTTTTT	643	15	46	51	151	138	140	102	3.5879	7.1592	12.8335	17.9406	14.2476	17.578	20.8216
miR-133-z	24	TTGGTCCCCTTCAACCAGCTGTAA	613	48	376	48	34	79	4	24	11.4813	58.5183	12.0785	4.0396	8.1562	0.5022	4.8992
miR-134-x	23	TGTGACTGGTTGACCAGAGGGAA	612	65	138	71	136	116	65	21	15.5476	21.4775	17.8662	16.1584	11.9762	8.1612	4.2868
miR-143-x	23	GGTGCAGTGCTGCATCTCTGGAA	602	97	112	69	78	91	80	75	23.2018	17.431	17.3629	9.2673	9.3952	10.0446	15.31
miR-328-y	24	CTGGCCCTCTCTGCCCTTCCGTTT	599	38	70	41	167	121	100	62	9.0894	10.8944	10.3171	19.8415	12.4925	12.5557	12.6563
miR-326-y	22	CCTCTGGGCCCTTCCTCCAGTA	598	43	54	40	162	167	84	48	10.2853	8.4042	10.0655	19.2475	17.2417	10.5468	9.7984
miR-329-y	22	AACACACCTGGTTAACCTCTCC	591	101	254	85	64	53	24	10	24.1586	39.531	21.3891	7.6039	5.4719	3.0134	2.0413
miR-200-z	23	AATACTGCCTGGTAATGATGACA	586	9	34	57	49	110	194	133	2.1527	5.2915	14.3433	5.8218	11.3568	24.3581	27.1497
miR-877-x	21	GTAGAGGAGATGGCGCAGGAA	578	61	119	73	104	100	89	32	14.5908	18.5204	18.3695	12.3564	10.3243	11.1746	6.5323
miR-380-y	23	TATGTAATGTGGTCCACGTCTAA	567	74	175	60	109	102	36	11	17.7004	27.2359	15.0982	12.9505	10.5308	4.5201	2.2455
miR-144-y	22	TACAGTATAGATGATGTACTCT	559	37	56	32	136	143	119	36	8.8502	8.7155	8.0524	16.1584	14.7638	14.9413	7.3488
miR-99-y	23	CAAGCTCGTGTCTGTGGGTCCGA	556	95	75	40	103	101	78	64	22.7234	11.6725	10.0655	12.2376	10.4276	9.7935	13.0645
miR-95-y	22	TTCAACGGGTATTTATTGAGCA	556	130	177	46	52	70	46	35	31.0952	27.5472	11.5753	6.1782	7.227	5.7756	7.1447
miR-4792-x	19	CGGTGAGCTCTCGCTGGCC	551	42	63	3	46	132	134	131	10.0461	9.8049	0.7549	5.4653	13.6281	16.8246	26.7414
miR-668-y	20	TGTCACTCGGCCCACTACCC	532	26	21	7	226	191	45	16	6.219	3.2683	1.7615	26.8514	19.7195	5.6501	3.2661
miR-216-x	22	TAATCTCAGCTGGCAACTGTGA	525	18	38	6	152	157	88	66	4.3055	5.9141	1.5098	18.0594	16.2092	11.049	13.4728
miR-331-x	23	TCTAGGTATGGTCCCAGGGATCT	524	27	39	22	131	124	108	73	6.4582	6.0697	5.536	15.5643	12.8022	13.5602	14.9017
miR-499-x	23	TTAAGACTTGCAGTGATGTTTAT	503	107	306	13	45	12	13	7	25.5938	47.6239	3.2713	5.3465	1.2389	1.6322	1.4289
miR-491-x	24	AGTGGGGAACCCTTCCATGAGGAA	490	5	22	10	102	132	167	52	1.196	3.4239	2.5164	12.1188	13.6281	20.968	10.6149
miR-5100-y	22	TCGAATCCCAGCGGTGCCTCCA	478	49	53	22	71	89	80	114	11.7205	8.2486	5.536	8.4356	9.1887	10.0446	23.2712
miR-154-x	24	AGAGGTCTTCCATGGTGCATTCGT	477	49	193	78	63	65	24	5	11.7205	30.0373	19.6276	7.4851	6.7108	3.0134	1.0207
miR-335-y	22	TTTTTCATTATTGCTCCTGAAA	477	133	235	79	16	14	0	0	31.8128	36.5739	19.8793	1.901	1.4454	0.01	0.01
miR-5991-y	19	TGAGGTAGTAGGTGTGGTT	477	0	2	0	83	190	96	106	0.01	0.3113	0.01	9.8614	19.6163	12.0535	21.6381
miR-105-x	23	AAATGCTCAGACTCCTGTGGTGA	477	37	39	19	284	72	23	3	8.8502	6.0697	4.7811	33.7425	7.4335	2.8878	0.6124
miR-196-y	23	TCGGCAACAAGAAACTGCCTGAG	466	71	16	9	181	66	120	3	16.9828	2.4901	2.2647	21.5049	6.8141	15.0668	0.6124
miR-3957-x	24	CTCGGAGAGTGGAGCTGTGGGTGT	461	66	123	35	113	86	27	11	15.7868	19.1429	8.8073	13.4257	8.8789	3.39	2.2455
miR-485-x	24	AGAGGCTGGCCGTGATGAATTCGT	452	52	127	41	104	81	36	11	12.4381	19.7655	10.3171	12.3564	8.3627	4.5201	2.2455
miR-301-y	25	CAGTGCAATAGTATTGTCAAAGCAA	452	30	20	9	146	111	93	43	7.1758	3.1127	2.2647	17.3465	11.46	11.6768	8.7777
miR-2779-x	22	TCGTATCCGGCTCGAAGGACCA	451	6	6	0	91	104	155	89	1.4352	0.9338	0.01	10.8119	10.7373	19.4613	18.1679
miR-2904-x	19	CGGGAGCCTCGGTCGGCCT	441	40	50	55	36	73	89	98	9.5678	7.7817	13.84	4.2772	7.5368	11.1746	20.0051
miR-500-x	25	TAATCCTTGCTACCTGGGTGAGAGA	433	42	63	21	102	100	78	27	10.0461	9.8049	5.2844	12.1188	10.3243	9.7935	5.5116
miR-2355-x	22	ATCCCCAGATACAATGGACAAT	428	96	164	113	14	12	13	16	22.9626	25.5239	28.4349	1.6634	1.2389	1.6322	3.2661
miR-4286-z	18	ACCCCACTCCTGGTACCA	426	128	170	81	5	6	13	23	30.6168	26.4577	20.3825	0.5941	0.6195	1.6322	4.6951
miR-9-x	25	TCTTTGGTTATCTAGCTGTATGAAA	425	411	9	0	0	2	3	0	98.3087	1.4007	0.01	0.01	0.2065	0.3767	0.01
miR-6651-x	19	CCACCAGGTTGCCTAAGGA	411	0	0	0	4	10	7	390	0.01	0.01	0.01	0.4752	1.0324	0.8789	79.6119
miR-671-x	25	AGGAAGCCCTGGAGGGGCTGGAGAA	409	39	53	57	75	99	61	25	9.3286	8.2486	14.3433	8.9109	10.2211	7.659	5.1033
miR-300-y	22	TATGCAAGGGCAAGCTCTCTGA	401	10	113	15	65	112	52	34	2.3919	17.5866	3.7745	7.7228	11.5633	6.529	6.9405
miR-17-x	25	CAAAGTGCTTACAGTGCAGGTAGAA	400	134	62	84	24	20	43	33	32.052	9.6493	21.1375	2.8515	2.0649	5.399	6.7364
miR-345-y	23	CCCTGAACTAGGGGTCTGGAGTT	392	65	79	55	79	59	34	21	15.5476	12.2951	13.84	9.3861	6.0914	4.2689	4.2868
miR-140-x	24	CAGTGGTTTTACCCTATGGTAGGA	390	94	72	0	51	61	47	65	22.4842	11.2056	0.01	6.0594	6.2979	5.9012	13.2687
miR-222-y	26	AGCTACATCTGGCTACTGGGTCTCTT	386	12	17	33	67	92	78	87	2.8703	2.6458	8.304	7.9604	9.4984	9.7935	17.7596
miR-155-x	26	TTAATGCTAATCGTGATAGGGGTTAT	381	30	88	21	71	54	34	83	7.1758	13.6958	5.2844	8.4356	5.5751	4.2689	16.9431
miR-3432-x	24	TGCGGGATCTTTAGTTGTGGCGTT	380	20	14	2	89	93	89	73	4.7839	2.1789	0.5033	10.5742	9.6016	11.1746	14.9017
miR-6236-y	18	CGTCGCCGGCAGTCGGAG	378	42	80	39	34	49	90	44	10.0461	12.4507	9.8138	4.0396	5.0589	11.3001	8.9819
miR-539-x	23	GGAGAAATTATCCTTGGTGTGTT	378	38	168	42	58	41	20	11	9.0894	26.1465	10.5687	6.8911	4.233	2.5111	2.2455
miR-433-y	24	ATCATGATGGGCTCCTCGGTGTAT	378	63	118	36	60	78	17	6	15.0692	18.3648	9.0589	7.1287	8.053	2.1345	1.2248
miR-132-y	22	TAACAGTCTACAGCCATGGTCG	374	128	91	35	54	28	22	16	30.6168	14.1627	8.8073	6.4158	2.8908	2.7623	3.2661
miR-532-y	23	CCTCCCACACCCAAGGCTTGCAT	373	75	149	45	38	36	14	16	17.9395	23.1894	11.3236	4.5148	3.7168	1.7578	3.2661
miR-2284-z	22	AAAAGTTCGTTCGGGTTTTTCG	363	14	30	7	84	114	65	49	3.3487	4.669	1.7615	9.9802	11.7698	8.1612	10.0025
miR-139-y	23	TGGAGACGCGGCCCTGTTGGAGT	355	18	43	11	53	79	86	65	4.3055	6.6923	2.768	6.297	8.1562	10.7979	13.2687
miR-504-x	23	AGACCCTGGTCTGCACTCTGTCA	352	17	25	29	194	45	27	15	4.0663	3.8908	7.2975	23.0495	4.646	3.39	3.062
let-7-y	22	CTATACAGTCTACTGTCTTTCA	351	33	48	18	80	87	57	28	7.8934	7.4704	4.5295	9.5049	8.9822	7.1568	5.7157
miR-7859-y	22	AAAAACTGGCAGCTTCATGTAA	350	78	105	45	29	32	36	25	18.6571	16.3415	11.3236	3.4455	3.3038	4.5201	5.1033
miR-410-y	23	AATATAACACAGATGGCCTGTAA	349	60	222	33	13	16	5	0	14.3516	34.5507	8.304	1.5446	1.6519	0.6278	0.01
miR-541-y	22	TGGTGGGCACAGAATCCGGCCT	347	90	170	16	34	26	7	4	21.5275	26.4577	4.0262	4.0396	2.6843	0.8789	0.8165
miR-145-y	22	ATTCCTGGAAATACTGTTCTAT	346	64	88	77	20	38	35	24	15.3084	13.6958	19.376	2.3762	3.9233	4.3945	4.8992
miR-660-x	25	TACCCATTGCATATCGGAGCTGTGT	343	85	146	34	33	25	20	0	20.3315	22.7225	8.5556	3.9208	2.5811	2.5111	0.01
miR-5126-y	18	GCGGGGGCGGGGGTGGGG	339	2	4	0	41	79	122	91	0.4784	0.6225	0.01	4.8713	8.1562	15.318	18.5761
miR-655-y	23	GATAATACATGGTTAACCTCTCT	335	45	228	54	0	8	0	0	10.7637	35.4845	13.5884	0.01	0.8259	0.01	0.01
miR-1185-x	23	AGAGGATACCCTTTGTATGTTCT	329	2	20	8	98	126	56	19	0.4784	3.1127	2.0131	11.6435	13.0087	7.0312	3.8785
miR-215-x	22	TGACCTATGAATTGACAGCCAT	325	85	78	25	44	40	31	22	20.3315	12.1394	6.2909	5.2277	4.1297	3.8923	4.4909
miR-323-y	21	CCCAATACACGGTCGATCTCT	318	92	121	20	39	37	9	0	22.0058	18.8317	5.0327	4.6337	3.82	1.13	0.01
miR-7134-x	22	ATGTCCGCGGGTTCCCTATCCC	317	72	106	75	16	28	14	6	17.222	16.4972	18.8727	1.901	2.8908	1.7578	1.2248
miR-455-y	23	GCAGTCCATGGGCATATACACCA	316	31	78	53	51	43	39	21	7.415	12.1394	13.3367	6.0594	4.4395	4.8967	4.2868
miR-6412-y	18	AACCATCCTCTGCTACCA	306	13	21	14	24	25	74	135	3.1095	3.2683	3.5229	2.8515	2.5811	9.2912	27.558
miR-7857-x	22	ATAGCCAGTTGGGGAAGAATGC	304	3	2	0	7	13	142	137	0.7176	0.3113	0.01	0.8317	1.3422	17.8291	27.9662
miR-382-x	24	GAAGTTGTTCGTGGTGGATTCGAA	304	27	58	15	79	83	31	11	6.4582	9.0268	3.7745	9.3861	8.5692	3.8923	2.2455
miR-455-x	22	GTATGTGCCTTTGGACTACACT	298	16	45	7	67	81	54	28	3.8271	7.0035	1.7615	7.9604	8.3627	6.7801	5.7157
miR-1285-y	20	GCCTGGGCAACATAGCGAGA	294	16	24	28	25	42	46	113	3.8271	3.7352	7.0458	2.9703	4.3362	5.7756	23.067
miR-200-x	23	CATCTTACCGGACAGTGCTGGAA	293	2	9	17	36	58	99	72	0.4784	1.4007	4.2778	4.2772	5.9881	12.4301	14.6976
miR-132-x	22	ACCGTGGCTTTCGATTGTTACT	291	78	40	20	59	52	26	16	18.6571	6.2253	5.0327	7.0099	5.3687	3.2645	3.2661
miR-190-x	25	TGATATGTTTGATATATTAGGTTGA	291	6	6	2	62	87	92	36	1.4352	0.9338	0.5033	7.3663	8.9822	11.5513	7.3488
miR-185-y	21	AGGGGCTGGCTTTCCTCTGGC	289	8	12	5	60	73	93	38	1.9136	1.8676	1.2582	7.1287	7.5368	11.6768	7.7571
miR-451-x	23	AAACCGTTACCATTACTGAGTTA	288	32	39	25	39	81	56	16	7.6542	6.0697	6.2909	4.6337	8.3627	7.0312	3.2661
miR-363-y	23	ATTGCACGGTATCCATCTGCGTT	282	26	31	16	42	74	73	20	6.219	4.8246	4.0262	4.9901	7.64	9.1657	4.0827
miR-6596-x	20	GCCGGGCCCGGGTCTTCCCG	278	12	12	6	29	47	100	72	2.8703	1.8676	1.5098	3.4455	4.8524	12.5557	14.6976
miR-154-y	23	GAGATATTGCACGGTTGATCTCT	278	30	146	32	30	36	4	0	7.1758	22.7225	8.0524	3.5643	3.7168	0.5022	0.01
miR-1307-y	25	ACTCGGCGTGGCGTCGGTCGTGGAT	274	13	25	12	92	56	44	32	3.1095	3.8908	3.0196	10.9307	5.7816	5.5245	6.5323
miR-762-y	19	GGGGTTTGGGGGGGGAGGG	269	2	2	2	49	73	90	51	0.4784	0.3113	0.5033	5.8218	7.5368	11.3001	10.4108
miR-1343-y	24	CTCCTGGGGCCCGCACTCTCGCAT	265	20	35	16	79	48	50	17	4.7839	5.4472	4.0262	9.3861	4.9557	6.2779	3.4703
miR-378-z	22	ACTGGACTTGGAGTCAGAAGAA	264	7	40	15	78	80	27	17	1.6744	6.2253	3.7745	9.2673	8.2595	3.39	3.4703
miR-210-x	23	AGCCACTGCCCACCGCACACTGA	261	43	33	48	41	28	48	20	10.2853	5.1359	12.0785	4.8713	2.8908	6.0267	4.0827
miR-1842-x	21	TGGCTCTGCGAGGTCGGCTCA	256	24	34	5	66	56	45	26	5.7407	5.2915	1.2582	7.8416	5.7816	5.6501	5.3075
miR-497-x	22	TAGCAGCACACTGTGGTTTGTA	255	0	2	2	8	69	72	102	0.01	0.3113	0.5033	0.9505	7.1238	9.0401	20.8216
miR-1277-y	22	TACGTAGATATATATGTATTTT	252	15	27	8	48	82	51	21	3.5879	4.2021	2.0131	5.703	8.466	6.4034	4.2868
miR-454-y	25	TAGTGCAATATTGCTTATAGGGTTA	248	44	59	27	46	29	27	16	10.5245	9.1824	6.7942	5.4653	2.9941	3.39	3.2661
miR-135-y	22	TATAGGGATTGGAGCCGTGGCA	248	107	46	30	31	9	18	7	25.5938	7.1592	7.5491	3.6832	0.9292	2.26	1.4289
miR-508-y	21	ATTGTCACCTTCTTGAGTGGA	242	0	0	2	110	70	51	9	0.01	0.01	0.5033	13.0693	7.227	6.4034	1.8372
miR-767-x	24	TGCACCATGGTTGTCTGAGCATGT	242	51	46	34	94	12	3	2	12.1989	7.1592	8.5556	11.1683	1.2389	0.3767	0.4083
miR-874-y	24	CTGCCCTGGCCCGAGGGACCGAAA	240	61	94	22	27	14	11	11	14.5908	14.6296	5.536	3.2079	1.4454	1.3811	2.2455
miR-8095-x	24	AAAGGATTCTGCTGTCGGTCCCAT	239	19	38	13	46	81	30	12	4.5447	5.9141	3.2713	5.4653	8.3627	3.7667	2.4496
miR-4508-x	19	AGCGGGGCTGGGCGCGCGC	236	8	11	4	39	62	72	40	1.9136	1.712	1.0065	4.6337	6.4011	9.0401	8.1653
miR-212-y	22	TAACAGTCTCCAGTCACGGCCA	235	44	20	14	41	57	45	14	10.5245	3.1127	3.5229	4.8713	5.8849	5.6501	2.8579
miR-2312-y	22	AAAACCTGAATGATCTTTTCGG	233	15	37	21	49	51	50	10	3.5879	5.7584	5.2844	5.8218	5.2654	6.2779	2.0413
miR-370-x	24	CAGGTCACGTCTCTGCAGTTACAC	233	18	53	10	53	67	22	10	4.3055	8.2486	2.5164	6.297	6.9173	2.7623	2.0413
miR-495-y	23	AACAAACATGGTGCACTTCTTTA	233	22	105	53	13	28	8	4	5.2623	16.3415	13.3367	1.5446	2.8908	1.0045	0.8165
miR-330-x	22	TCTCTGGGCCTGTGTCTTAGGA	226	16	10	5	48	60	53	34	3.8271	1.5563	1.2582	5.703	6.1946	6.6545	6.9405
miR-543-y	23	AAACATTCGCGGTGCACTTCTTA	214	37	98	15	30	28	4	2	8.8502	15.2521	3.7745	3.5643	2.8908	0.5022	0.4083
miR-4443-x	18	CTTGGAGGCGTGGGTTTT	213	0	10	11	55	56	27	54	0.01	1.5563	2.768	6.5346	5.7816	3.39	11.0232
miR-6937-x	19	TGGCTCTAAGGGCTGGGTC	212	31	16	5	22	34	42	62	7.415	2.4901	1.2582	2.6139	3.5103	5.2734	12.6563
miR-1388-y	24	ATCTCAGGTTCGTCAGCCCGCATT	210	10	32	17	41	47	36	27	2.3919	4.9803	4.2778	4.8713	4.8524	4.5201	5.5116
miR-146-y	22	CCTAGGGACTCAGTTCTGGTTT	210	0	2	2	0	3	148	55	0.01	0.3113	0.5033	0.01	0.3097	18.5824	11.2273
miR-7-x	18	ACTGATGATGTGTTGTTG	209	43	26	11	18	27	55	29	10.2853	4.0465	2.768	2.1386	2.7876	6.9056	5.9199
miR-7862-y	21	TGGTGCTCCCTGGAGCTGAGC	208	77	46	29	21	15	8	12	18.4179	7.1592	7.2975	2.495	1.5487	1.0045	2.4496
miR-425-x	24	ATGACACGATCACTCCCGTTGAGA	206	20	42	42	29	28	27	18	4.7839	6.5366	10.5687	3.4455	2.8908	3.39	3.6744
miR-361-y	24	CCCCCAGGTGTGATTCTGATTTGA	203	4	10	4	59	68	31	27	0.9568	1.5563	1.0065	7.0099	7.0206	3.8923	5.5116
miR-18-x	24	TAAGGTGCATCTAGTGCAGTTAGA	203	32	37	2	21	32	44	35	7.6542	5.7584	0.5033	2.495	3.3038	5.5245	7.1447
miR-10-y	22	AGATTCGATTCTAGGGGAATAA	195	36	27	23	40	23	35	11	8.611	4.2021	5.7876	4.7525	2.3746	4.3945	2.2455
miR-3970-x	23	TGAGGTAGTAGTTTGTGCTGTCT	194	0	8	5	46	74	38	23	0.01	1.2451	1.2582	5.4653	7.64	4.7712	4.6951
miR-1268-x	18	CGGGCGTGGTGGGGGGGG	193	0	0	0	17	45	74	57	0.01	0.01	0.01	2.0198	4.646	9.2912	11.6356
miR-709-y	20	GGGAGGCTGAGGCTGGAGGA	192	0	0	0	4	9	17	162	0.01	0.01	0.01	0.4752	0.9292	2.1345	33.0696
miR-147-y	23	GTGTGCGGAAATGCTTCTGCTAT	190	0	0	0	26	49	43	72	0.01	0.01	0.01	3.0891	5.0589	5.399	14.6976
miR-133-x	22	GAGCTGGTAAAATGGAACCAAA	189	17	104	19	15	15	0	19	4.0663	16.1859	4.7811	1.7822	1.5487	0.01	3.8785
miR-1306-x	23	CCACCTCCCCTGCAAACGTCCAT	183	9	12	4	51	61	25	21	2.1527	1.8676	1.0065	6.0594	6.2979	3.1389	4.2868
miR-493-x	24	TTGTACATGGTAGGCTTTCATTAT	182	18	58	12	45	42	7	0	4.3055	9.0268	3.0196	5.3465	4.3362	0.8789	0.01
miR-544-y	23	ATTCTGCATTTTTAGCAAGTTCT	182	7	15	10	72	53	20	5	1.6744	2.3345	2.5164	8.5544	5.4719	2.5111	1.0207
miR-1839-y	23	AGACCTACTTATCTACCAACAGC	181	39	81	45	6	3	5	2	9.3286	12.6063	11.3236	0.7129	0.3097	0.6278	0.4083
miR-218-y	22	AAACATGGTTCCGTCAAGCACC	178	34	44	20	24	21	20	15	8.1326	6.8479	5.0327	2.8515	2.1681	2.5111	3.062
miR-235-y	22	TATTGCACTCGTCCCGGCCTCA	177	49	17	11	27	35	30	8	11.7205	2.6458	2.768	3.2079	3.6135	3.7667	1.6331
miR-3607-x	24	TGCATATGATGAAGCAAATCAGTA	174	0	0	0	0	0	0	174	0.01	0.01	0.01	0.01	0.01	0.01	35.5192
miR-7857-y	23	ATTGTTCTCCAACCTGGCTCTTT	174	6	12	0	2	9	71	74	1.4352	1.8676	0.01	0.2376	0.9292	8.9146	15.1059
miR-26-y	22	CCTATTCTTGATTACTTGTTTC	173	47	44	34	10	24	9	5	11.2421	6.8479	8.5556	1.1881	2.4778	1.13	1.0207
miR-340-x	23	GTTATAAAGCAATGAGACTGATT	172	49	48	29	16	11	12	7	11.7205	7.4704	7.2975	1.901	1.1357	1.5067	1.4289
miR-677-y	25	CTGAAGCCAGATGCCGTTTCTGAGA	170	3	0	0	17	14	24	112	0.7176	0.01	0.01	2.0198	1.4454	3.0134	22.8629
miR-6516-y	22	ATCATGTATGATACTGCAAACA	168	21	34	20	8	16	7	62	5.0231	5.2915	5.0327	0.9505	1.6519	0.8789	12.6563
miR-3956-y	22	TGACCTTCCTGCATCCCGTTCA	167	21	56	5	24	48	6	7	5.0231	8.7155	1.2582	2.8515	4.9557	0.7533	1.4289
miR-6516-x	20	ATTTGCAGTAACAGGTGTGA	165	15	15	8	17	20	27	63	3.5879	2.3345	2.0131	2.0198	2.0649	3.39	12.8604
miR-338-y	23	TCCAGCATCAGTGATTTTGTTGT	163	2	0	0	13	50	67	31	0.4784	0.01	0.01	1.5446	5.1622	8.4123	6.3281
miR-4497-x	18	GCTCCGGGACGGCTGGGA	154	8	11	5	18	23	35	54	1.9136	1.712	1.2582	2.1386	2.3746	4.3945	11.0232
miR-1271-y	24	AGTGCCTGCTATGTGCCAGGCAGA	151	6	2	2	43	48	37	13	1.4352	0.3113	0.5033	5.1089	4.9557	4.6456	2.6537
miR-1388-x	23	AGGACTGTCCAACCTGAGAATGT	150	20	65	42	8	6	5	4	4.7839	10.1162	10.5687	0.9505	0.6195	0.6278	0.8165
miR-204-x	24	TTCCCTTTGTCATCCTATGCCTGT	150	34	32	43	31	5	3	2	8.1326	4.9803	10.8204	3.6832	0.5162	0.3767	0.4083
miR-32-y	21	CAATTTAGTGTGTGTGATATT	149	36	14	11	17	25	26	20	8.611	2.1789	2.768	2.0198	2.5811	3.2645	4.0827
miR-3897-y	19	GTGGTGGCGGGGGTGGGGA	149	0	0	0	50	26	43	30	0.01	0.01	0.01	5.9406	2.6843	5.399	6.124
miR-382-y	23	AATCATTCACGGACAACACTTTA	146	23	49	24	19	29	2	0	5.5015	7.6261	6.0393	2.2574	2.9941	0.2511	0.01
miR-221-z	22	AGCTACATTGTCTGCTGGGTAA	144	2	2	6	23	56	24	31	0.4784	0.3113	1.5098	2.7327	5.7816	3.0134	6.3281
miR-3958-y	23	GAGATATTGCACGGTTGATCTCT	143	20	44	13	28	36	2	0	4.7839	6.8479	3.2713	3.3267	3.7168	0.2511	0.01
miR-369-x	23	AGATCGACCGTGTTATATTCGCA	138	21	47	21	17	15	11	6	5.0231	7.3148	5.2844	2.0198	1.5487	1.3811	1.2248
miR-652-x	24	ACAACCCTAGGAGAGGGTGCCATT	138	22	35	19	22	19	15	6	5.2623	5.4472	4.7811	2.6139	1.9616	1.8834	1.2248
miR-496-y	23	TGAGTATTACATGGCCAATCTCT	135	31	55	22	18	9	0	0	7.415	8.5599	5.536	2.1386	0.9292	0.01	0.01
miR-152-x	23	AGGTTCTGTGATACACTCCGACT	133	36	53	37	0	0	4	3	8.611	8.2486	9.3105	0.01	0.01	0.5022	0.6124
miR-615-x	22	GGGGGTCCCCGGTGCTCGGATC	132	7	0	7	64	24	22	8	1.6744	0.01	1.7615	7.6039	2.4778	2.7623	1.6331
miR-653-x	21	TGTTGAAACAATCTCCGTTGA	130	22	34	3	20	51	0	0	5.2623	5.2915	0.7549	2.3762	5.2654	0.01	0.01
miR-542-x	20	TCGGGATCATCATGTCACGA	129	0	6	7	39	53	19	5	0.01	0.9338	1.7615	4.6337	5.4719	2.3856	1.0207
miR-1273-x	18	GGCTGGAGGATCGCTTGA	127	0	4	2	5	17	22	77	0.01	0.6225	0.5033	0.5941	1.7551	2.7623	15.7183
miR-135-x	21	TATGGCTTTATTCCTATGTGA	124	16	2	4	50	6	27	19	3.8271	0.3113	1.0065	5.9406	0.6195	3.39	3.8785
miR-551-y	22	GCGACCCATACTTGGTTTCAGT	124	27	12	0	20	35	21	9	6.4582	1.8676	0.01	2.3762	3.6135	2.6367	1.8372
miR-186-y	23	GCCCAAAGGTGAATTTTTTGGGT	123	0	2	0	46	25	39	11	0.01	0.3113	0.01	5.4653	2.5811	4.8967	2.2455
miR-6134-y	19	TGAGGTAGTAGGTTGTAGT	122	0	2	0	27	28	38	27	0.01	0.3113	0.01	3.2079	2.8908	4.7712	5.5116
miR-708-y	23	TCTAGACTGTGAGCTTCTAGAGA	122	53	15	11	4	17	16	6	12.6773	2.3345	2.768	0.4752	1.7551	2.0089	1.2248
miR-365-x	23	AGGGACTTTTGGGGGCAGATGTG	121	0	0	0	13	44	35	29	0.01	0.01	0.01	1.5446	4.5427	4.3945	5.9199
miR-483-y	24	CACTCCTCTCCTCCCGTCTTCTCT	120	34	65	12	2	7	0	0	8.1326	10.1162	3.0196	0.2376	0.7227	0.01	0.01
miR-2448-y	22	GTGGTTGATTGGATCCGTGGGT	118	4	4	0	32	22	40	16	0.9568	0.6225	0.01	3.802	2.2714	5.0223	3.2661
miR-4532-x	18	CCCGGGGAGCCCGGCGGG	118	7	10	0	10	32	23	36	1.6744	1.5563	0.01	1.1881	3.3038	2.8878	7.3488
miR-31-y	23	TGCTATGCCAACATATTGCCATC	117	13	14	3	8	10	30	39	3.1095	2.1789	0.7549	0.9505	1.0324	3.7667	7.9612
miR-744-y	21	CTGTTGCCACTAACCTCAACC	116	38	15	16	16	15	11	5	9.0894	2.3345	4.0262	1.901	1.5487	1.3811	1.0207
miR-3959-x	23	CGGTTGATCAGAGAACATACATT	116	16	32	20	12	22	8	6	3.8271	4.9803	5.0327	1.4257	2.2714	1.0045	1.2248
miR-122-x	24	TGGAGTGTGACAATGGTGTTTGTT	115	55	56	0	0	2	0	2	13.1557	8.7155	0.01	0.01	0.2065	0.01	0.4083
miR-371-x	21	ACTCAAACTGTGGGGGCACTT	115	115	0	0	0	0	0	0	27.5073	0.01	0.01	0.01	0.01	0.01	0.01
miR-330-y	24	CAAAGCACACGGCCTGCAGAGAGT	113	20	26	13	9	12	16	17	4.7839	4.0465	3.2713	1.0693	1.2389	2.0089	3.4703
miR-20-y	23	ACTGCATTATGAGCACTTAAAGA	112	10	12	9	33	21	16	11	2.3919	1.8676	2.2647	3.9208	2.1681	2.0089	2.2455
miR-374-y	21	ACTTATCAGGTTGTATTATCT	111	14	39	6	11	23	14	4	3.3487	6.0697	1.5098	1.3069	2.3746	1.7578	0.8165
miR-21-y	23	CAACAGCAGTCGATGGGCTGTAA	111	4	10	5	31	26	23	12	0.9568	1.5563	1.2582	3.6832	2.6843	2.8878	2.4496
miR-506-x	21	TACTCAGGAAGGCATTATTCA	110	9	32	23	16	15	15	0	2.1527	4.9803	5.7876	1.901	1.5487	1.8834	0.01
miR-324-x	23	CGCATCCCCTAGGGCATTGGTAA	109	6	5	6	21	34	18	19	1.4352	0.7782	1.5098	2.495	3.5103	2.26	3.8785
miR-219-y	23	AGAATTGTGGCTGGACATCTGTT	105	74	9	6	3	6	7	0	17.7004	1.4007	1.5098	0.3564	0.6195	0.8789	0.01
miR-2285-x	21	AAAAAGTTGATTTAGGTTTTT	101	0	10	0	6	31	19	35	0.01	1.5563	0.01	0.7129	3.2005	2.3856	7.1447
miR-345-x	23	GCTGACTCCTAGTCCAGTGCTGA	101	7	8	2	24	25	25	10	1.6744	1.2451	0.5033	2.8515	2.5811	3.1389	2.0413
miR-422-x	22	ACTGGACTTGGGGTCAGAAGGA	100	0	10	2	26	35	14	13	0.01	1.5563	0.5033	3.0891	3.6135	1.7578	2.6537
miR-6529-y	22	CCTGTGCCTTTTACCTCTTTAA	100	31	22	3	20	12	6	6	7.415	3.4239	0.7549	2.3762	1.2389	0.7533	1.2248
miR-1911-x	23	TGAGTACCGCCATGTCTGTTGGG	99	28	29	7	11	18	4	2	6.6974	4.5134	1.7615	1.3069	1.8584	0.5022	0.4083
miR-1434-x	19	GTACATGATGACTGAAATT	98	0	4	6	11	4	2	71	0.01	0.6225	1.5098	1.3069	0.413	0.2511	14.4935
miR-153-y	24	TTGCATAGTCACAAAAGTGATCAT	97	79	6	2	4	6	0	0	18.8963	0.9338	0.5033	0.4752	0.6195	0.01	0.01
miR-499-y	24	GAACATCACAGCAAGTCTGTGCTT	96	21	75	0	0	0	0	0	5.0231	11.6725	0.01	0.01	0.01	0.01	0.01
miR-1434-y	23	CTGAAGAAATCTAAGGTCTGAGG	95	0	0	0	6	7	12	70	0.01	0.01	0.01	0.7129	0.7227	1.5067	14.2893
miR-4770-y	19	TGAGATGAAGCTGTAGCTC	94	5	20	21	9	12	11	16	1.196	3.1127	5.2844	1.0693	1.2389	1.3811	3.2661
miR-2366-y	23	TGGGTCACAGAAGAGGGTCTGGT	93	0	2	0	30	33	17	11	0.01	0.3113	0.01	3.5643	3.407	2.1345	2.2455
miR-197-y	24	TTCACCACCTTCTCCACCCAGCAT	92	20	46	17	5	0	2	2	4.7839	7.1592	4.2778	0.5941	0.01	0.2511	0.4083
miR-195-y	24	CCAATATTGGCTGTGCTGCTCCAT	92	2	0	2	6	34	35	13	0.4784	0.01	0.5033	0.7129	3.5103	4.3945	2.6537
miR-1296-x	23	TTAGGGCCCTGGCTCCATCTCAA	90	11	19	2	22	15	17	4	2.6311	2.957	0.5033	2.6139	1.5487	2.1345	0.8165
miR-17-y	23	ACTGCAGTGAAGGCACTTGTAAA	90	16	9	11	18	9	23	4	3.8271	1.4007	2.768	2.1386	0.9292	2.8878	0.8165
miR-365-y	23	TAATGCCCCTAAAAATCCTTAAA	89	3	10	9	3	29	16	19	0.7176	1.5563	2.2647	0.3564	2.9941	2.0089	3.8785
miR-148-x	23	GAAAGTTCTGAGACACTCCGACT	86	20	34	11	10	9	2	0	4.7839	5.2915	2.768	1.1881	0.9292	0.2511	0.01
miR-421-y	24	ATCAACAGACATTAATTGGGCGTT	85	8	23	6	14	21	11	2	1.9136	3.5796	1.5098	1.6634	2.1681	1.3811	0.4083
miR-2435-x	22	AAAACTAGAATGAACTTTTTGG	84	8	53	16	0	5	2	0	1.9136	8.2486	4.0262	0.01	0.5162	0.2511	0.01
miR-4301-x	19	CTCCCACTGCTTCACTTGA	83	0	0	0	0	0	0	83	0.01	0.01	0.01	0.01	0.01	0.01	16.9431
miR-2311-x	20	GTACTGAAACTGGGCTCGTA	83	0	2	0	2	5	4	70	0.01	0.3113	0.01	0.2376	0.5162	0.5022	14.2893
miR-9298-y	21	GCTGATTGTCATTTTCTGATT	82	0	0	0	0	0	0	82	0.01	0.01	0.01	0.01	0.01	0.01	16.7389
miR-2331-y	23	ACCCTGCAGCCAAAGAAGCTACT	82	0	4	2	20	21	24	11	0.01	0.6225	0.5033	2.3762	2.1681	3.0134	2.2455
miR-362-y	24	AACACACCTATTCAAGGATTCAAT	81	14	43	6	4	4	8	2	3.3487	6.6923	1.5098	0.4752	0.413	1.0045	0.4083
miR-352-y	20	TGAGTAGTAGGTTGTATAGT	77	0	0	0	17	23	9	28	0.01	0.01	0.01	2.0198	2.3746	1.13	5.7157
miR-3195-x	18	CGCGCCGGGCCCGGGTCT	76	3	2	0	10	16	28	17	0.7176	0.3113	0.01	1.1881	1.6519	3.5156	3.4703
miR-7975-y	20	TCATCCGAGTCACGGCACCA	76	12	6	4	20	11	11	12	2.8703	0.9338	1.0065	2.3762	1.1357	1.3811	2.4496
miR-6525-x	22	TCCGGGGAAAGCAGGAGTGAGG	75	2	2	0	15	20	23	13	0.4784	0.3113	0.01	1.7822	2.0649	2.8878	2.6537
miR-2411-y	23	TGAACTGTCTTACTCCCACATCT	74	7	3	6	12	7	9	30	1.6744	0.4669	1.5098	1.4257	0.7227	1.13	6.124
miR-485-y	24	GTCATACACGGCTCTCCTCTCTAG	73	18	32	6	13	4	0	0	4.3055	4.9803	1.5098	1.5446	0.413	0.01	0.01
miR-4492-y	19	CGGGGCTGGGCGCGCGCCG	70	3	12	4	10	22	13	6	0.7176	1.8676	1.0065	1.1881	2.2714	1.6322	1.2248
miR-4429-x	21	AAAAGCTGGGTTGAGAGGCGA	69	0	4	3	12	24	19	7	0.01	0.6225	0.7549	1.4257	2.4778	2.3856	1.4289
miR-457-x	23	TAGCAGCACATAAATATTGGAGA	69	0	6	4	11	11	23	14	0.01	0.9338	1.0065	1.3069	1.1357	2.8878	2.8579
miR-466-x	22	TGAGTGTGTGTGTGAGTGTGTG	68	0	11	0	21	17	11	8	0.01	1.712	0.01	2.495	1.7551	1.3811	1.6331
miR-1246-x	20	ATGGATTTTTGGAGCAGGGC	68	0	0	0	0	0	0	68	0.01	0.01	0.01	0.01	0.01	0.01	13.8811
miR-1468-x	24	CTCCGTTTGCCTGTTTTGCTGAAA	68	0	9	2	6	19	27	5	0.01	1.4007	0.5033	0.7129	1.9616	3.39	1.0207
miR-214-x	23	GCCTGTCTACACTTGCTGTGCAT	67	4	2	0	22	18	21	0	0.9568	0.3113	0.01	2.6139	1.8584	2.6367	0.01
miR-144-x	24	GGATATCATCATATACTGTAAGTA	66	13	35	6	6	4	2	0	3.1095	5.4472	1.5098	0.7129	0.413	0.2511	0.01
miR-223-y	24	TGTCAGTTTGTCAAATACCCCAAT	65	4	2	2	5	7	17	28	0.9568	0.3113	0.5033	0.5941	0.7227	2.1345	5.7157
miR-221-x	24	ACCTGGCATACAATGTAGATTTCA	65	3	9	12	5	14	15	7	0.7176	1.4007	3.0196	0.5941	1.4454	1.8834	1.4289
miR-1338-x	23	AGGACTGTCCAACCTGAGAATGA	64	8	24	23	2	2	3	2	1.9136	3.7352	5.7876	0.2376	0.2065	0.3767	0.4083
miR-670-y	23	TTTCCTCATATTCATTCAGGAGT	64	3	0	0	8	26	11	16	0.7176	0.01	0.01	0.9505	2.6843	1.3811	3.2661
miR-885-x	22	TCCATTACACTACCCTGCCTCT	63	22	6	2	6	6	3	18	5.2623	0.9338	0.5033	0.7129	0.6195	0.3767	3.6744
miR-130-x	22	ACTCTTTCCCTGTTGCACCACT	62	5	14	10	25	6	2	0	1.196	2.1789	2.5164	2.9703	0.6195	0.2511	0.01
miR-628-y	23	TCTAGTAAGAGTGGCAGTCGAAA	62	4	2	0	22	15	14	5	0.9568	0.3113	0.01	2.6139	1.5487	1.7578	1.0207
miR-4488-x	18	GGGGGGCGGGCGCCGGCG	62	0	0	0	3	9	27	23	0.01	0.01	0.01	0.3564	0.9292	3.39	4.6951
miR-208-y	22	ATAAGACGAGCAAAAAGCTTGT	61	16	43	0	0	0	0	2	3.8271	6.6923	0.01	0.01	0.01	0.01	0.4083
miR-211-x	24	TTCCCTTTGTCATCCTTTGCCCTT	60	6	8	6	15	12	6	7	1.4352	1.2451	1.5098	1.7822	1.2389	0.7533	1.4289
miR-72-x	24	AGGCAAGATGCTGGCATAGCTGAA	60	6	4	0	6	5	12	27	1.4352	0.6225	0.01	0.7129	0.5162	1.5067	5.5116
miR-1329-x	22	TACAGTGACCAGGTGACGACGG	58	4	9	0	5	9	13	18	0.9568	1.4007	0.01	0.5941	0.9292	1.6322	3.6744
miR-2779-y	19	TTCCGGCTCGAAGGACCAA	58	2	8	2	14	10	14	8	0.4784	1.2451	0.5033	1.6634	1.0324	1.7578	1.6331
miR-1197-y	21	TAGGACACACGGTCTACTTCT	58	23	19	2	10	2	2	0	5.5015	2.957	0.5033	1.1881	0.2065	0.2511	0.01
miR-665-x	23	AGGGGTCTTGGCCTCTGCCCAGA	57	4	22	10	9	6	6	0	0.9568	3.4239	2.5164	1.0693	0.6195	0.7533	0.01
miR-677-x	22	CTCACTGATGAGCAGCTTCTGA	57	2	0	2	0	2	2	49	0.4784	0.01	0.5033	0.01	0.2065	0.2511	10.0025
miR-15-y	23	CGAATCATTATTTGCTGCTCTAT	56	17	15	4	7	7	6	0	4.0663	2.3345	1.0065	0.8317	0.7227	0.7533	0.01
miR-412-z	24	CTGGTCGACCAGTTGGAAAGTAAT	55	6	14	2	19	6	8	0	1.4352	2.1789	0.5033	2.2574	0.6195	1.0045	0.01
miR-735-y	18	CCCACTGCTAAATTTGAC	55	2	0	0	0	2	0	51	0.4784	0.01	0.01	0.01	0.2065	0.01	10.4108
miR-5106-y	19	AGGGCTATAGCTCAGTTGG	55	0	0	0	7	5	29	14	0.01	0.01	0.01	0.8317	0.5162	3.6412	2.8579
miR-1247-y	21	CGGGAACGTCGGGACTGGAGC	54	0	0	0	0	3	26	25	0.01	0.01	0.01	0.01	0.3097	3.2645	5.1033
miR-2288-y	21	TGAGGTAGTAGGTGTGTGGTT	54	0	0	0	14	18	17	5	0.01	0.01	0.01	1.6634	1.8584	2.1345	1.0207
miR-545-x	22	TCAGTAAATGTTTATTGGATGT	53	3	0	0	13	12	19	6	0.7176	0.01	0.01	1.5446	1.2389	2.3856	1.2248
miR-4286-x	19	ACCCCACTCCTGGTACCAT	53	17	24	5	5	2	0	0	4.0663	3.7352	1.2582	0.5941	0.2065	0.01	0.01
miR-4791-x	18	TGGATATGATGACTGAAA	51	2	12	5	11	12	9	0	0.4784	1.8676	1.2582	1.3069	1.2389	1.13	0.01
miR-1949-y	18	CAGGATGCCAGCACAGTT	51	0	4	0	12	10	8	17	0.01	0.6225	0.01	1.4257	1.0324	1.0045	3.4703
miR-487-x	23	GTGGTTATCCCTGCTGTGTTCGA	50	0	9	0	16	15	7	3	0.01	1.4007	0.01	1.901	1.5487	0.8789	0.6124
miR-184-y	24	TGGACGGAGAACTGATAAGGGTTT	49	0	0	0	0	0	36	13	0.01	0.01	0.01	0.01	0.01	4.5201	2.6537
miR-22-x	23	AGTTCTTCAGTGGCAAGCTTTAA	49	6	2	2	9	8	12	10	1.4352	0.3113	0.5033	1.0693	0.8259	1.5067	2.0413
miR-544-x	21	TATTGTTAAAAGGCAGATTCT	48	5	19	14	5	5	0	0	1.196	2.957	3.5229	0.5941	0.5162	0.01	0.01
miR-495-x	23	GAAGTCGCCCATGTTCTTTTCGA	48	5	12	2	11	12	3	3	1.196	1.8676	0.5033	1.3069	1.2389	0.3767	0.6124
miR-654-y	23	TGTCTGCTGACCATCACCTTTAG	47	6	29	4	8	0	0	0	1.4352	4.5134	1.0065	0.9505	0.01	0.01	0.01
miR-3955-x	24	TTTGATGGCTGATCCTCTCACTAT	47	5	11	2	12	9	2	6	1.196	1.712	0.5033	1.4257	0.9292	0.2511	1.2248
miR-490-x	20	CCATGGATCTCCAGGTGGGA	45	26	13	0	4	0	2	0	6.219	2.0232	0.01	0.4752	0.01	0.2511	0.01
miR-7865-x	19	CAGGGAGGGCAGGGGAGGG	45	6	8	2	7	10	8	4	1.4352	1.2451	0.5033	0.8317	1.0324	1.0045	0.8165
miR-340-y	24	TCCGTCTCAGTTACTTTATAGCCT	45	6	16	10	0	7	3	3	1.4352	2.4901	2.5164	0.01	0.7227	0.3767	0.6124
miR-212-x	23	ACCTTGGCTCTAGACTGCTTACT	44	7	0	5	8	12	10	2	1.6744	0.01	1.2582	0.9505	1.2389	1.2556	0.4083
miR-9-y	24	TAAAGCTAGATAACCGAAAGTAAA	44	42	2	0	0	0	0	0	10.0461	0.3113	0.01	0.01	0.01	0.01	0.01
miR-4171-x	20	TGACTCTCTTAAGGTAGCCA	44	2	2	3	0	2	3	32	0.4784	0.3113	0.7549	0.01	0.2065	0.3767	6.5323
miR-543-x	22	AAGTTGCCCGTGTCTTTTTCGA	43	2	0	2	8	18	11	2	0.4784	0.01	0.5033	0.9505	1.8584	1.3811	0.4083
miR-5606-x	18	GTGAAGAGACATGAGAGG	43	0	0	0	7	14	7	15	0.01	0.01	0.01	0.8317	1.4454	0.8789	3.062
miR-9270-x	18	GAAGGGACGGGCGATGGC	43	0	0	0	4	24	0	15	0.01	0.01	0.01	0.4752	2.4778	0.01	3.062
miR-431-y	19	TGCAGGTCGTCTTGCAGGG	42	2	22	5	3	7	3	0	0.4784	3.4239	1.2582	0.3564	0.7227	0.3767	0.01
miR-3615-y	18	CTCCGCCCCTCGCCGCTC	42	2	0	2	8	15	7	8	0.4784	0.01	0.5033	0.9505	1.5487	0.8789	1.6331
miR-302-y	23	TAAGTGCTTCCATGTTTTAGTAG	41	39	2	0	0	0	0	0	9.3286	0.3113	0.01	0.01	0.01	0.01	0.01
miR-1306-y	23	ACGTTGGCTCTGGTGGTGATGTT	41	2	4	2	16	9	6	2	0.4784	0.6225	0.5033	1.901	0.9292	0.7533	0.4083
miR-502-x	24	TAATTCTTGCTCCCCAGGTGAGAT	40	18	10	3	2	7	0	0	4.3055	1.5563	0.7549	0.2376	0.7227	0.01	0.01
miR-5627-y	18	CTCCCCGGCGCCGCTCGT	40	0	0	0	21	6	11	2	0.01	0.01	0.01	2.495	0.6195	1.3811	0.4083
miR-4306-y	19	TGGAGAGAAAGGCAGTTGA	40	0	0	0	7	8	15	10	0.01	0.01	0.01	0.8317	0.8259	1.8834	2.0413
miR-1185-y	23	ATATACAGAGGGAGACTCTTAAA	40	2	22	4	8	2	2	0	0.4784	3.4239	1.0065	0.9505	0.2065	0.2511	0.01
miR-129-x	24	CTTTTTGCGGTCTGGGCTTGCATT	40	2	10	9	13	6	0	0	0.4784	1.5563	2.2647	1.5446	0.6195	0.01	0.01
miR-138-y	21	GCTACTTCACAACACCAGGGT	40	22	5	4	3	6	0	0	5.2623	0.7782	1.0065	0.3564	0.6195	0.01	0.01
miR-4872-x	19	GAAAACAAAAACTCTGAGT	40	0	0	0	0	2	0	38	0.01	0.01	0.01	0.01	0.2065	0.01	7.7571
miR-802-x	22	TCAGTAACAAAGATTCATCCTT	39	12	23	0	0	0	0	4	2.8703	3.5796	0.01	0.01	0.01	0.01	0.8165
miR-2403-y	23	CTCGGGAAGCTAGCTGGCCTTGT	39	4	0	10	11	2	7	5	0.9568	0.01	2.5164	1.3069	0.2065	0.8789	1.0207
miR-216-y	22	CACAGTGGTCTCTGGGATTATG	38	6	20	4	2	4	2	0	1.4352	3.1127	1.0065	0.2376	0.413	0.2511	0.01
miR-663-x	18	GGGGGGGCGCGGCGGGAC	38	9	0	0	3	5	6	15	2.1527	0.01	0.01	0.3564	0.5162	0.7533	3.062
miR-3963-x	20	GGATCCCACTTCTGACACCG	38	0	0	0	0	0	0	38	0.01	0.01	0.01	0.01	0.01	0.01	7.7571
miR-93-y	24	ACTGCTGAGCCAGCACTTCCCGTA	38	5	11	0	12	7	3	0	1.196	1.712	0.01	1.4257	0.7227	0.3767	0.01
miR-3059-x	22	TTTCCTCTCTGCCCCATAGGGT	38	30	0	0	2	4	0	2	7.1758	0.01	0.01	0.2376	0.413	0.01	0.4083
miR-188-y	21	CTCCCACATGCAGTGTTTGCA	38	8	16	4	2	4	2	2	1.9136	2.4901	1.0065	0.2376	0.413	0.2511	0.4083
miR-3656-y	18	GCGGGGGCGGGGGTGGGG	38	0	0	0	8	11	14	5	0.01	0.01	0.01	0.9505	1.1357	1.7578	1.0207
miR-490-y	23	CACCCTGGAGGACTCCATGCTGT	36	14	20	2	0	0	0	0	3.3487	3.1127	0.5033	0.01	0.01	0.01	0.01
miR-2683-y	23	TGATTGGAAGACACTCTGCAACT	36	0	6	0	5	8	13	4	0.01	0.9338	0.01	0.5941	0.8259	1.6322	0.8165
miR-1292-y	18	CTCCCGCCCCGCCTCCCG	35	0	0	0	4	13	12	6	0.01	0.01	0.01	0.4752	1.3422	1.5067	1.2248
miR-4286-y	19	ACCCCACTCCTGGTACCAA	35	11	11	8	3	0	2	0	2.6311	1.712	2.0131	0.3564	0.01	0.2511	0.01
miR-381-x	25	AGCGAGGTTGCCCTTTGTATATTCT	35	0	3	2	8	20	2	0	0.01	0.4669	0.5033	0.9505	2.0649	0.2511	0.01
miR-7704-x	18	CGGGGTCCGCGGCGATGT	34	6	11	6	0	5	3	3	1.4352	1.712	1.5098	0.01	0.5162	0.3767	0.6124
miR-183-y	22	TGAATTACCGAAGGGCCATAAT	33	6	2	8	0	7	10	0	1.4352	0.3113	2.0131	0.01	0.7227	1.2556	0.01
miR-1599-y	18	GGGGGGGAAAAAAAAAAA	33	19	4	0	0	2	6	2	4.5447	0.6225	0.01	0.01	0.2065	0.7533	0.4083
miR-122-y	23	AACGCCATTATCACACTAAATAT	32	14	18	0	0	0	0	0	3.3487	2.8014	0.01	0.01	0.01	0.01	0.01
miR-8191-x	18	CCCCTGCGTCGGTCACCA	31	0	0	0	0	6	8	17	0.01	0.01	0.01	0.01	0.6195	1.0045	3.4703
miR-449-x	23	TGGCAGTGTATTGTTAGCTGGTA	31	2	0	4	7	5	4	9	0.4784	0.01	1.0065	0.8317	0.5162	0.5022	1.8372
miR-3546-y	22	ATAACCCGGGCCAAAAGCTCGC	31	2	5	4	9	4	7	0	0.4784	0.7782	1.0065	1.0693	0.413	0.8789	0.01
miR-6536-x	21	TTTAAGTACACGATGAACTGC	31	0	2	0	6	12	5	6	0.01	0.3113	0.01	0.7129	1.2389	0.6278	1.2248
miR-16-y	24	CCAGTATTAACTGTGCTGCTGAAT	30	9	6	2	6	7	0	0	2.1527	0.9338	0.5033	0.7129	0.7227	0.01	0.01
miR-513-x	21	TTCACAAGAAGGTGTCATTCA	30	2	2	5	10	8	3	0	0.4784	0.3113	1.2582	1.1881	0.8259	0.3767	0.01
miR-92-x	23	AGGGACGGGACGCGGTGCAGTGT	30	2	2	0	9	7	8	2	0.4784	0.3113	0.01	1.0693	0.7227	1.0045	0.4083
miR-3585-x	21	TTCACAAGAAGGTGTCATTCA	30	2	2	5	10	8	3	0	0.4784	0.3113	1.2582	1.1881	0.8259	0.3767	0.01
miR-2115-x	18	AGCTTCCAAGACTCCAGA	30	0	0	0	0	0	0	30	0.01	0.01	0.01	0.01	0.01	0.01	6.124
miR-27-x	22	AGGGCTTAGCTGCTTGCGAGCA	29	0	0	0	0	11	16	2	0.01	0.01	0.01	0.01	1.1357	2.0089	0.4083
miR-194-y	22	CCAGTGGGGCTGCTGTTATCTG	29	5	2	0	5	10	5	2	1.196	0.3113	0.01	0.5941	1.0324	0.6278	0.4083
miR-2448-x	22	CTGTGGATACAACCAAACACGG	29	2	6	0	2	5	14	0	0.4784	0.9338	0.01	0.2376	0.5162	1.7578	0.01
miR-2474-y	22	TACCGGGCCAGCTGGAAGGAGA	28	2	0	0	2	3	10	11	0.4784	0.01	0.01	0.2376	0.3097	1.2556	2.2455
miR-3607-y	22	ATACTGTAAACGCTTTCTGCTG	28	0	0	0	0	0	0	28	0.01	0.01	0.01	0.01	0.01	0.01	5.7157
miR-219-x	24	TGATTGTCCAAACGCAATTCTCGA	28	13	4	2	3	2	4	0	3.1095	0.6225	0.5033	0.3564	0.2065	0.5022	0.01
miR-1224-x	25	GTGAGGACTCGGGAGGTGGAGGGTT	28	12	6	0	6	2	2	0	2.8703	0.9338	0.01	0.7129	0.2065	0.2511	0.01
miR-134-y	23	TCTGGGCTGCCTCGTCACCAACT	28	0	9	2	6	6	5	0	0.01	1.4007	0.5033	0.7129	0.6195	0.6278	0.01
miR-7144-x	22	ACTTTCCCGGGACTTGGAGCGC	28	8	2	2	11	5	0	0	1.9136	0.3113	0.5033	1.3069	0.5162	0.01	0.01
miR-137-y	25	TTATTGCTTAAGAATACGCGTAGAA	28	28	0	0	0	0	0	0	6.6974	0.01	0.01	0.01	0.01	0.01	0.01
miR-1261-x	18	TGGATAAGGCACTGGCTT	28	2	0	0	0	0	2	24	0.4784	0.01	0.01	0.01	0.01	0.2511	4.8992
miR-3178-x	18	GGGGCGCGGCCGGAAAGG	27	0	2	0	0	2	5	18	0.01	0.3113	0.01	0.01	0.2065	0.6278	3.6744
miR-224-y	23	AATGGTACCCTAGTGACTACAAT	27	8	15	4	0	0	0	0	1.9136	2.3345	1.0065	0.01	0.01	0.01	0.01
miR-545-y	22	TCAACAAACATTTATTGTGCGC	27	0	0	0	12	9	6	0	0.01	0.01	0.01	1.4257	0.9292	0.7533	0.01
miR-505-y	24	CGTCAACACTTGCTGGTTTCCTCG	26	9	6	8	3	0	0	0	2.1527	0.9338	2.0131	0.3564	0.01	0.01	0.01
miR-7705-x	22	AATAGCTCAGAATGTCACTTCT	26	6	7	2	5	4	0	2	1.4352	1.0894	0.5033	0.5941	0.413	0.01	0.4083
miR-3609-y	26	CAAAGTGATGAGCATTACTGGCTGGA	25	0	0	2	0	2	0	21	0.01	0.01	0.5033	0.01	0.2065	0.01	4.2868
miR-4510-x	23	TGAGGGAGTAGGTTGTATGGTTA	25	0	2	0	5	6	9	3	0.01	0.3113	0.01	0.5941	0.6195	1.13	0.6124
miR-671-y	21	TCCGGTTCTCAGGGCTCCAAT	25	0	0	0	2	11	8	4	0.01	0.01	0.01	0.2376	1.1357	1.0045	0.8165
miR-1623-x	21	AGCAGGCACAGACAGGCAGTA	24	5	5	0	2	8	0	4	1.196	0.7782	0.01	0.2376	0.8259	0.01	0.8165
miR-29-x	24	GCTGGTTTCATATGGTGGTTTAGA	23	0	4	4	2	5	3	5	0.01	0.6225	1.0065	0.2376	0.5162	0.3767	1.0207
miR-6089-y	18	GGGGGGGGGCGCGGCGGG	23	7	3	0	2	0	11	0	1.6744	0.4669	0.01	0.2376	0.01	1.3811	0.01
miR-2981-y	18	CGAGGCGGGCGGGCGGGG	22	2	0	0	0	4	11	5	0.4784	0.01	0.01	0.01	0.413	1.3811	1.0207
miR-8903-x	22	TCTTGGGCCCCACCCCTGGAGA	22	2	3	0	6	5	6	0	0.4784	0.4669	0.01	0.7129	0.5162	0.7533	0.01
miR-1957-x	18	CAGTGGCAGAGCATTTGA	21	7	2	0	2	0	2	8	1.6744	0.3113	0.01	0.2376	0.01	0.2511	1.6331
miR-508-x	21	TACTCCAGAGGGTGTCATTCA	21	0	10	4	5	2	0	0	0.01	1.5563	1.0065	0.5941	0.2065	0.01	0.01
miR-6126-x	18	GGGAAGGCCCGGCGGGGA	21	0	0	0	3	5	9	4	0.01	0.01	0.01	0.3564	0.5162	1.13	0.8165
miR-377-y	22	ATCACACAAGGGCAACTTTTGT	21	0	12	2	3	4	0	0	0.01	1.8676	0.5033	0.3564	0.413	0.01	0.01
miR-6215-y	19	TTAAGGTTGCAGAGCCCGG	20	0	0	0	0	0	0	20	0.01	0.01	0.01	0.01	0.01	0.01	4.0827
miR-302-x	22	TAAACGTGGATGTACTTGCTTT	19	19	0	0	0	0	0	0	4.5447	0.01	0.01	0.01	0.01	0.01	0.01
miR-100-y	23	CAAGCTTGTGTCTATAGGTATGA	19	2	2	0	11	2	2	0	0.4784	0.3113	0.01	1.3069	0.2065	0.2511	0.01
miR-628-x	24	ATGCTGACATATTTACTAGAGGAA	18	5	2	0	2	7	0	2	1.196	0.3113	0.01	0.2376	0.7227	0.01	0.4083
miR-2427-x	24	TAGGTCATTTCGAAGAGGGCTGAT	18	0	0	0	0	0	0	18	0.01	0.01	0.01	0.01	0.01	0.01	3.6744
miR-236-y	24	TAATACTGCCTGGTAATGACGACA	18	0	0	2	2	2	8	4	0.01	0.01	0.5033	0.2376	0.2065	1.0045	0.8165
miR-664-y	24	TATTCATTTATCTCCCAGCCTACT	17	4	6	7	0	0	0	0	0.9568	0.9338	1.7615	0.01	0.01	0.01	0.01
miR-566-x	18	CGCGCGCCTGTAATCCCA	17	0	0	0	0	0	0	17	0.01	0.01	0.01	0.01	0.01	0.01	3.4703
miR-582-x	22	TTACAGTTGTTCAACCAGTTAA	17	2	6	0	2	0	7	0	0.4784	0.9338	0.01	0.2376	0.01	0.8789	0.01
miR-489-y	22	AGTGACATCACATATATGGCGA	17	0	11	0	0	3	3	0	0.01	1.712	0.01	0.01	0.3097	0.3767	0.01
miR-1298-y	22	CATCTGGGCAACTGATTGAACT	17	0	7	0	4	4	2	0	0.01	1.0894	0.01	0.4752	0.413	0.2511	0.01
let-7-z	22	TGAGGTAGTTGTTTGTACTGTT	17	0	9	6	2	0	0	0	0.01	1.4007	1.5098	0.2376	0.01	0.01	0.01
miR-153-x	23	GTCATTTTTGTGATGTTGCAGCT	17	11	2	0	0	0	2	2	2.6311	0.3113	0.01	0.01	0.01	0.2511	0.4083
miR-191-y	23	CTGCGCTTGGATTTCGTTCCCTT	17	0	2	0	6	6	3	0	0.01	0.3113	0.01	0.7129	0.6195	0.3767	0.01
miR-6517-x	23	TCAGGGTCTGTGAGCTCCTCGGA	17	0	2	0	2	5	8	0	0.01	0.3113	0.01	0.2376	0.5162	1.0045	0.01
miR-2295-y	21	TCGGGGTCGGAGGAAGGTTCT	16	0	0	0	0	12	4	0	0.01	0.01	0.01	0.01	1.2389	0.5022	0.01
miR-7-y	21	ACAAATCACAGTCTGCCATTA	16	6	2	0	2	2	0	4	1.4352	0.3113	0.01	0.2376	0.2065	0.01	0.8165
miR-448-y	21	TTGCATATGTAGGATGTCCCA	16	7	0	2	4	3	0	0	1.6744	0.01	0.5033	0.4752	0.3097	0.01	0.01
miR-655-x	23	AGAGGTTATCCGTGTTATGTTCT	16	0	3	2	3	8	0	0	0.01	0.4669	0.5033	0.3564	0.8259	0.01	0.01
miR-1343-x	23	TGGGGAGCGGCCCCCGGGCGGGT	16	0	2	0	5	3	6	0	0.01	0.3113	0.01	0.5941	0.3097	0.7533	0.01
miR-501-y	22	ATGCACCTGGGCAAGGATTCAA	15	0	6	0	2	2	5	0	0.01	0.9338	0.01	0.2376	0.2065	0.6278	0.01
miR-4531-y	18	AATGGATAAGGCTTCTGA	15	3	0	0	0	2	7	3	0.7176	0.01	0.01	0.01	0.2065	0.8789	0.6124
miR-2483-x	22	CGTCAGCCATCCAGCTGTTTGA	15	0	0	2	2	9	2	0	0.01	0.01	0.5033	0.2376	0.9292	0.2511	0.01
miR-1692-x	18	TAGCTCAGTCGGTAGAGC	15	5	4	0	0	0	0	6	1.196	0.6225	0.01	0.01	0.01	0.01	1.2248
miR-279-x	21	CCCAGTGTTCAGACTATTGTT	15	0	0	0	3	5	3	4	0.01	0.01	0.01	0.3564	0.5162	0.3767	0.8165
miR-383-x	22	AGATCAGAAGGTGATTGTGGAA	14	0	2	0	10	2	0	0	0.01	0.3113	0.01	1.1881	0.2065	0.01	0.01
miR-2411-x	24	TGGAGTCACTGTCAGATGCAGCCA	14	0	4	8	0	2	0	0	0.01	0.6225	2.0131	0.01	0.2065	0.01	0.01
miR-1895-y	20	CGAGGAGGACGAGGAGGACG	14	2	2	0	0	6	4	0	0.4784	0.3113	0.01	0.01	0.6195	0.5022	0.01
miR-3431-y	20	ATCTAAAGGACTGACTGAAA	14	0	4	2	4	2	0	2	0.01	0.6225	0.5033	0.4752	0.2065	0.01	0.4083
miR-1264-y	22	CAAGTCTTATTTGAGCACCTGT	14	9	0	5	0	0	0	0	2.1527	0.01	1.2582	0.01	0.01	0.01	0.01
miR-7911-x	18	TCCCGGCCAATGCACCAT	14	4	8	0	2	0	0	0	0.9568	1.2451	0.01	0.2376	0.01	0.01	0.01
miR-875-x	21	TATACCTCAGTTTTATCAGGT	13	0	0	0	0	0	11	2	0.01	0.01	0.01	0.01	0.01	1.3811	0.4083
miR-3962-y	21	TGGGTAGTAGTTTGTACAGTT	13	0	4	0	4	0	5	0	0.01	0.6225	0.01	0.4752	0.01	0.6278	0.01
miR-3613-y	22	ACAAAAAAAAAAGCCCAACCCT	13	3	6	2	0	0	2	0	0.7176	0.9338	0.5033	0.01	0.01	0.2511	0.01
miR-149-y	22	GAGGGAGGGACGGGGGCTGTGC	13	0	0	0	3	2	6	2	0.01	0.01	0.01	0.3564	0.2065	0.7533	0.4083
miR-432-y	23	CTGGATGGCTCCTCCATGTCTAT	13	2	2	0	5	2	0	2	0.4784	0.3113	0.01	0.5941	0.2065	0.01	0.4083
miR-6535-x	22	TAGGGGGAGCGGTTGGAGGACT	13	2	3	4	0	4	0	0	0.4784	0.4669	1.0065	0.01	0.413	0.01	0.01
miR-9182-x	22	TTTTGCACAAAGAGTCTCATGT	12	0	0	2	2	4	2	2	0.01	0.01	0.5033	0.2376	0.413	0.2511	0.4083
miR-371-y	22	AGTGCCGCCATGTTTTGAGTGT	12	12	0	0	0	0	0	0	2.8703	0.01	0.01	0.01	0.01	0.01	0.01
miR-451-z	25	AAACCGTTACCATTACTGAGTTTAA	12	0	4	6	2	0	0	0	0.01	0.6225	1.5098	0.2376	0.01	0.01	0.01
miR-3955-y	23	TGGGATTTTAGTCCATCATAGAA	12	0	8	2	2	0	0	0	0.01	1.2451	0.5033	0.2376	0.01	0.01	0.01
miR-3548-y	22	CAGCACTGTCCGGTAAGATGTC	12	4	0	4	2	0	2	0	0.9568	0.01	1.0065	0.2376	0.01	0.2511	0.01
miR-1290-y	19	TGGATGTTTGGAGCAGGGA	12	0	0	0	0	0	0	12	0.01	0.01	0.01	0.01	0.01	0.01	2.4496
miR-202-x	21	ATCCTATGCATATACTTCTTT	12	12	0	0	0	0	0	0	2.8703	0.01	0.01	0.01	0.01	0.01	0.01
miR-3154-y	21	CAGAAGGGGAGTTGGAGCAGA	12	0	0	2	4	4	0	2	0.01	0.01	0.5033	0.4752	0.413	0.01	0.4083
miR-885-y	22	AGGCAGCGGGGTGTAGTGGATA	11	2	0	0	0	0	6	3	0.4784	0.01	0.01	0.01	0.01	0.7533	0.6124
miR-6341-x	21	CAGTGCAATGATATTGTCAAT	11	0	0	2	4	5	0	0	0.01	0.01	0.5033	0.4752	0.5162	0.01	0.01
miR-491-y	22	CTTATGCAAGATTCCCTTCTAA	10	0	2	4	0	2	2	0	0.01	0.3113	1.0065	0.01	0.2065	0.2511	0.01
miR-656-y	21	AATATTATACAGTCAAACTCT	10	2	2	3	0	3	0	0	0.4784	0.3113	0.7549	0.01	0.3097	0.01	0.01
miR-103-x	24	AGCTTCTTTACAGTGCTGCCTTCT	10	4	6	0	0	0	0	0	0.9568	0.9338	0.01	0.01	0.01	0.01	0.01
miR-377-x	23	AGAGGTTGCCCTTGGTGAATTCT	10	0	6	2	0	0	2	0	0.01	0.9338	0.5033	0.01	0.01	0.2511	0.01
miR-6087-x	18	GGTGAGGCGGGGGGGCGA	10	0	0	0	0	0	5	5	0.01	0.01	0.01	0.01	0.01	0.6278	1.0207
miR-182-y	22	GGTGGTTCTAGACTTGCCACCT	10	0	0	0	0	8	2	0	0.01	0.01	0.01	0.01	0.8259	0.2511	0.01
miR-3976-x	18	GATATAGACAGCAGGACG	10	0	0	0	0	0	5	5	0.01	0.01	0.01	0.01	0.01	0.6278	1.0207
miR-18-y	25	ACTGCCCTAAGTGCTCCTTCTGGAT	10	2	0	0	2	2	2	2	0.4784	0.01	0.01	0.2376	0.2065	0.2511	0.4083
miR-323-x	22	AGGTGGTCCGTGGCGCGTTCGT	10	0	5	0	2	3	0	0	0.01	0.7782	0.01	0.2376	0.3097	0.01	0.01
miR-301-x	22	GCTCTGACTTTATTGCACTCCT	9	4	2	0	3	0	0	0	0.9568	0.3113	0.01	0.3564	0.01	0.01	0.01
miR-3085-y	22	TCTGGCTGCTATGGCCCCCTCT	9	7	0	0	0	0	0	2	1.6744	0.01	0.01	0.01	0.01	0.01	0.4083
miR-1911-y	22	CACCAGGCATTGTGGTCTCTGC	9	2	4	0	3	0	0	0	0.4784	0.6225	0.01	0.3564	0.01	0.01	0.01
miR-105-y	22	ACGGATGTTTGAGCATGTGCTT	9	3	2	0	4	0	0	0	0.7176	0.3113	0.01	0.4752	0.01	0.01	0.01
miR-873-x	21	TGCAGGAACTTGTGAGTCTCT	9	2	2	0	3	0	2	0	0.4784	0.3113	0.01	0.3564	0.01	0.2511	0.01
miR-1297-y	18	TTCAAGTAATCCAGGTGA	8	0	0	0	2	4	2	0	0.01	0.01	0.01	0.2376	0.413	0.2511	0.01
miR-25-x	23	AGGCGGAGACTCGGGCAATTGCT	8	0	2	2	0	2	0	2	0.01	0.3113	0.5033	0.01	0.2065	0.01	0.4083
miR-2340-y	19	TCCCTGGTGGTCTAGTGGA	8	0	0	0	3	0	2	3	0.01	0.01	0.01	0.3564	0.01	0.2511	0.6124
miR-2483-y	22	AAACATCTGGTTGGTTGAGCGA	8	0	0	0	0	6	2	0	0.01	0.01	0.01	0.01	0.6195	0.2511	0.01
miR-7341-y	18	TAAAATGCACTGAGACCT	8	3	2	3	0	0	0	0	0.7176	0.3113	0.7549	0.01	0.01	0.01	0.01
miR-1193-y	22	TAGGTCACCCGTTTGACTATCT	8	3	5	0	0	0	0	0	0.7176	0.7782	0.01	0.01	0.01	0.01	0.01
miR-433-x	23	TACGGTGAGCCTGTCATTGTTCT	8	2	4	0	0	2	0	0	0.4784	0.6225	0.01	0.01	0.2065	0.01	0.01
miR-1338-y	22	ATCTCAGGTTCGTCAGCCCGTT	8	0	6	0	0	0	2	0	0.01	0.9338	0.01	0.01	0.01	0.2511	0.01
miR-410-x	22	AGGTTGTCTGTGATGAGTTCGT	8	3	0	0	0	3	0	2	0.7176	0.01	0.01	0.01	0.3097	0.01	0.4083
miR-3967-y	21	AGCTTTTCTGACTGATGTTGA	7	0	3	2	0	0	0	2	0.01	0.4669	0.5033	0.01	0.01	0.01	0.4083
miR-3141-z	18	GAGGGCGGGTGGAGGAGG	7	0	0	0	0	3	2	2	0.01	0.01	0.01	0.01	0.3097	0.2511	0.4083
miR-889-y	21	TTAATATCGGACAGCCATTAT	7	0	7	0	0	0	0	0	0.01	1.0894	0.01	0.01	0.01	0.01	0.01
miR-124-x	22	CGTGTTCACAGCGGACCTTGAA	7	7	0	0	0	0	0	0	1.6744	0.01	0.01	0.01	0.01	0.01	0.01
miR-1357-x	20	GATTATGAGATATGAGGGCC	7	0	0	0	0	0	0	7	0.01	0.01	0.01	0.01	0.01	0.01	1.4289
miR-380-x	23	ATGGTTGACCACAGAACATGCGT	7	0	5	0	2	0	0	0	0.01	0.7782	0.01	0.2376	0.01	0.01	0.01
miR-3065-x	23	TCAACAAAATCACTGATGCTGGA	7	0	0	0	5	0	2	0	0.01	0.01	0.01	0.5941	0.01	0.2511	0.01
miR-668-x	23	GTAAGTGCGTCTCGGGTGAGCAT	7	0	0	0	2	2	3	0	0.01	0.01	0.01	0.2376	0.2065	0.3767	0.01
miR-3064-x	21	TCTGGCTGTTGTGGTGTGCAA	7	0	0	0	0	2	3	2	0.01	0.01	0.01	0.01	0.2065	0.3767	0.4083
miR-8970-y	25	GCCCGGGGGCTGTAGTGACCGCGCC	7	0	0	2	2	0	0	3	0.01	0.01	0.5033	0.2376	0.01	0.01	0.6124
miR-4755-y	18	ATGCCCGGCTCTGAAGGG	6	0	0	6	0	0	0	0	0.01	0.01	1.5098	0.01	0.01	0.01	0.01
miR-1249-y	23	ACGCCCTTCCCCCCCTTCTTCAA	6	2	2	2	0	0	0	0	0.4784	0.3113	0.5033	0.01	0.01	0.01	0.01
miR-466-y	20	CATGCACACGCACATACACA	6	2	4	0	0	0	0	0	0.4784	0.6225	0.01	0.01	0.01	0.01	0.01
miR-2319-y	21	CTACTCTGTATTAGGCACTTA	6	2	2	0	0	0	2	0	0.4784	0.3113	0.01	0.01	0.01	0.2511	0.01
miR-5119-y	19	CTCATCACATCCTGGGGCT	6	0	3	0	0	3	0	0	0.01	0.4669	0.01	0.01	0.3097	0.01	0.01
miR-1-x	23	ACATACTTCTTTATGTACCCATA	6	2	2	0	2	0	0	0	0.4784	0.3113	0.01	0.2376	0.01	0.01	0.01
miR-760-x	24	CCCCTCAGTCCACCAGAGCCCGGA	6	0	0	0	2	2	0	2	0.01	0.01	0.01	0.2376	0.2065	0.01	0.4083
miR-6749-x	20	CGGGGCTGGGGTTGGGGGGG	6	2	0	0	0	4	0	0	0.4784	0.01	0.01	0.01	0.413	0.01	0.01
miR-339-y	20	GCTCCTCGAGGCCAGAGCCC	6	0	2	0	4	0	0	0	0.01	0.3113	0.01	0.4752	0.01	0.01	0.01
miR-7475-x	18	GGCGCCGCCGCCCCCTCC	6	0	2	2	0	2	0	0	0.01	0.3113	0.5033	0.01	0.2065	0.01	0.01
miR-101-x	21	CAGTTATCACAGTGCTGATGA	6	0	0	0	0	0	0	6	0.01	0.01	0.01	0.01	0.01	0.01	1.2248
miR-2976-z	18	AGCGGAGCGGAGCGGCGG	6	0	0	0	0	2	2	2	0.01	0.01	0.01	0.01	0.2065	0.2511	0.4083
miR-204-y	22	GCTGGGAAGGCAAAGGGACGTA	6	0	0	2	2	0	0	2	0.01	0.01	0.5033	0.2376	0.01	0.01	0.4083
miR-129-y	24	AAGCCCTTACCCCAAAAAGCATTT	6	0	2	4	0	0	0	0	0.01	0.3113	1.0065	0.01	0.01	0.01	0.01
miR-34-y	22	AATCACTAACCACACGGCCCGG	6	0	0	0	4	2	0	0	0.01	0.01	0.01	0.4752	0.2065	0.01	0.01
miR-425-y	24	ATCGGGAATGTCGTGTCCGCCCTT	6	0	0	2	4	0	0	0	0.01	0.01	0.5033	0.4752	0.01	0.01	0.01
miR-8-x	18	CTTTAAGGATGGTAGTTA	6	0	0	0	0	0	0	6	0.01	0.01	0.01	0.01	0.01	0.01	1.2248
miR-3432-y	22	CAGCAACTAAAGATCCCTCAGA	6	2	0	0	2	0	2	0	0.4784	0.01	0.01	0.2376	0.01	0.2511	0.01
miR-1582-y	21	AAAGAGAGCCAGAACACAGGT	6	2	4	0	0	0	0	0	0.4784	0.6225	0.01	0.01	0.01	0.01	0.01
miR-346-x	23	TGTCTGCACGCATGCCTGCCTCT	6	2	4	0	0	0	0	0	0.4784	0.6225	0.01	0.01	0.01	0.01	0.01
miR-664-x	24	ACAGGCTAGGAGAAATGATTGGAA	6	0	2	0	0	0	2	2	0.01	0.3113	0.01	0.01	0.01	0.2511	0.4083
miR-98-y	20	CTATACAACTTACTACTTTA	6	0	2	2	0	2	0	0	0.01	0.3113	0.5033	0.01	0.2065	0.01	0.01
miR-663-y	19	GGCCCGGCCGTGCCGGCGG	5	0	3	2	0	0	0	0	0.01	0.4669	0.5033	0.01	0.01	0.01	0.01
miR-1912-y	21	TACCCAGAGCGTGCAGTGTGA	5	0	5	0	0	0	0	0	0.01	0.7782	0.01	0.01	0.01	0.01	0.01
miR-551-x	23	GAAATCAAGCGTGGGTGAGACCT	5	5	0	0	0	0	0	0	1.196	0.01	0.01	0.01	0.01	0.01	0.01
miR-873-y	23	GAGGCTGATGAGTTCCCGGGATT	5	0	5	0	0	0	0	0	0.01	0.7782	0.01	0.01	0.01	0.01	0.01
miR-79-x	23	CCTTTGGTTATCTAGCTGTATGA	5	3	2	0	0	0	0	0	0.7176	0.3113	0.01	0.01	0.01	0.01	0.01
miR-2307-y	22	AGTGATGATGAACCCTCTGAGC	5	0	2	3	0	0	0	0	0.01	0.3113	0.7549	0.01	0.01	0.01	0.01
miR-3965-y	21	TGCTTATCAGTCTGATGTTGA	5	0	3	0	2	0	0	0	0.01	0.4669	0.01	0.2376	0.01	0.01	0.01
miR-1251-x	22	ACTCTAGCTGCCAAAGGCGCTT	5	5	0	0	0	0	0	0	1.196	0.01	0.01	0.01	0.01	0.01	0.01
miR-7477-x	18	GCGCGAAGCGGGGCTGGG	5	0	2	0	0	0	3	0	0.01	0.3113	0.01	0.01	0.01	0.3767	0.01
miR-6518-y	18	AGAGGAGAACCTGGACCT	5	0	2	3	0	0	0	0	0.01	0.3113	0.7549	0.01	0.01	0.01	0.01
miR-8112-y	22	TCTCCGCCACCTCCACCTCGGC	4	0	0	0	0	0	4	0	0.01	0.01	0.01	0.01	0.01	0.5022	0.01
miR-223-x	24	TGTGTATTTGACAAGCTGAGTTGA	4	2	0	0	0	0	0	2	0.4784	0.01	0.01	0.01	0.01	0.01	0.4083
miR-4523-x	20	ACCGAGAGGGCCTCGGCTGT	4	2	2	0	0	0	0	0	0.4784	0.3113	0.01	0.01	0.01	0.01	0.01
miR-935-y	22	CAGTTACCGCTTCCGCTACCGC	4	4	0	0	0	0	0	0	0.9568	0.01	0.01	0.01	0.01	0.01	0.01
miR-2432-y	22	AGGATTCTAGGCTTAGAGGTCC	4	0	2	0	0	2	0	0	0.01	0.3113	0.01	0.01	0.2065	0.01	0.01
miR-201-x	21	TACTCAGGAAGGCATTATTCT	4	0	0	0	2	0	2	0	0.01	0.01	0.01	0.2376	0.01	0.2511	0.01
miR-2422-x	20	TTGAGGGGACTGAGGTGTGG	4	0	4	0	0	0	0	0	0.01	0.6225	0.01	0.01	0.01	0.01	0.01
miR-367-y	21	ATTGCACTTTAGCAATGGTGA	4	0	2	2	0	0	0	0	0.01	0.3113	0.5033	0.01	0.01	0.01	0.01
miR-23-x	20	GGGGTTCCTGGGGATGGGAA	4	0	4	0	0	0	0	0	0.01	0.6225	0.01	0.01	0.01	0.01	0.01
miR-33-y	23	CAATGTTTCCACAGTGCATCAGA	4	0	0	0	2	2	0	0	0.01	0.01	0.01	0.2376	0.2065	0.01	0.01
miR-6715-y	21	CCAAACCAGTTGTGCCTGTAG	4	0	0	0	0	4	0	0	0.01	0.01	0.01	0.01	0.413	0.01	0.01
miR-3960-y	18	CGGCGTCGGCGGCGGCGG	4	0	0	0	0	2	0	2	0.01	0.01	0.01	0.01	0.2065	0.01	0.4083
miR-4206-y	18	TATTGGATGGTTTAGTGA	4	0	0	0	0	2	2	0	0.01	0.01	0.01	0.01	0.2065	0.2511	0.01
miR-13-y	19	ATGAAAGCCACTTTGATGT	4	0	2	2	0	0	0	0	0.01	0.3113	0.5033	0.01	0.01	0.01	0.01
miR-107-x	24	AGCTTCTTTACAGTGTTGCCTTGA	4	0	0	0	4	0	0	0	0.01	0.01	0.01	0.4752	0.01	0.01	0.01
miR-2468-x	20	TAGAAACATGGAAGATTGTC	4	0	2	0	0	0	2	0	0.01	0.3113	0.01	0.01	0.01	0.2511	0.01
miR-745-y	22	AAGCTGCCTGTTGAAGATCTGT	4	0	2	2	0	0	0	0	0.01	0.3113	0.5033	0.01	0.01	0.01	0.01
miR-2356-x	22	CTCCTGTGATGAGGGAGTCTGA	4	0	2	0	0	0	2	0	0.01	0.3113	0.01	0.01	0.01	0.2511	0.01
miR-7864-y	21	CTTCCTCTTCCGGTCGGCAGT	4	0	2	0	0	2	0	0	0.01	0.3113	0.01	0.01	0.2065	0.01	0.01
miR-599-x	22	TTTGATAAGCTGACATGGGACA	4	0	2	0	0	0	2	0	0.01	0.3113	0.01	0.01	0.01	0.2511	0.01
miR-7845-x	20	AAGGGACTGGGAGGGTGGTG	4	0	0	0	0	2	2	0	0.01	0.01	0.01	0.01	0.2065	0.2511	0.01
miR-208-x	22	GAGCTTTTGGCCCGGGTTATAC	4	0	2	2	0	0	0	0	0.01	0.3113	0.5033	0.01	0.01	0.01	0.01
miR-6606-x	20	AGGAGCGGGAGGAGGCGGAG	4	0	0	0	2	2	0	0	0.01	0.01	0.01	0.2376	0.2065	0.01	0.01
miR-4951-x	18	GGTGAAGTTGCTGATGCT	4	0	4	0	0	0	0	0	0.01	0.6225	0.01	0.01	0.01	0.01	0.01
miR-6395-x	22	CTGGCCCTCTCTGCCCTTTATA	4	0	2	2	0	0	0	0	0.01	0.3113	0.5033	0.01	0.01	0.01	0.01
miR-2051-x	18	GAAAAGTTTCGGGTTTTT	4	0	0	0	0	0	4	0	0.01	0.01	0.01	0.01	0.01	0.5022	0.01
miR-3538-x	21	GTTCGGTGATGAGACCCTGGA	4	0	0	0	0	0	0	4	0.01	0.01	0.01	0.01	0.01	0.01	0.8165
miR-4683-y	22	TGGAGATCCAGTGCTCGCCCGA	4	0	4	0	0	0	0	0	0.01	0.6225	0.01	0.01	0.01	0.01	0.01
miR-217-x	24	TACTGCATCAGGAACTGATTGGAA	4	4	0	0	0	0	0	0	0.9568	0.01	0.01	0.01	0.01	0.01	0.01
miR-342-x	22	AGGGGTGCTATCTGTGGTTGAA	4	2	0	0	2	0	0	0	0.4784	0.01	0.01	0.2376	0.01	0.01	0.01
miR-150-x	22	TCTCCCAACCCTTGTACCAGTA	4	0	0	0	0	2	0	2	0.01	0.01	0.01	0.01	0.2065	0.01	0.4083
miR-276-y	22	TAGGAACTTCATACCGTGCTCT	4	0	0	0	0	0	0	4	0.01	0.01	0.01	0.01	0.01	0.01	0.8165
miR-7118-x	18	TGGGGAGGGAGGGAGAGG	4	0	2	2	0	0	0	0	0.01	0.3113	0.5033	0.01	0.01	0.01	0.01
miR-285-y	23	TAGCACCATTCGAAATCAGTGTT	4	0	0	0	0	2	0	2	0.01	0.01	0.01	0.01	0.2065	0.01	0.4083
miR-312-y	22	TATTGCACTTGACACGGCCTGT	3	0	3	0	0	0	0	0	0.01	0.4669	0.01	0.01	0.01	0.01	0.01
miR-196-z	22	TAGGTAGTTTTATGTTGTTGGA	3	0	0	0	3	0	0	0	0.01	0.01	0.01	0.3564	0.01	0.01	0.01
miR-1820-x	19	TCTGTTGATTGTTTTTTGA	3	0	0	0	0	0	0	3	0.01	0.01	0.01	0.01	0.01	0.01	0.6124
miR-4451-y	19	TGGTAGAGCTGAGGACTGT	3	0	0	0	3	0	0	0	0.01	0.01	0.01	0.3564	0.01	0.01	0.01
miR-4695-y	19	ATCCCACCGCTGCCACCTT	3	0	3	0	0	0	0	0	0.01	0.4669	0.01	0.01	0.01	0.01	0.01
miR-3162-y	18	CTCCCGACCCCTCCACCC	3	0	3	0	0	0	0	0	0.01	0.4669	0.01	0.01	0.01	0.01	0.01
miR-3586-x	19	TCCCTGTCCTCCAGGAGCC	3	0	0	0	0	3	0	0	0.01	0.01	0.01	0.01	0.3097	0.01	0.01
miR-341-y	21	TCGGTCGATCGGTCGGTCGGT	3	0	0	0	0	3	0	0	0.01	0.01	0.01	0.01	0.3097	0.01	0.01
miR-2481-x	19	ACATTGTCTGCTGGGTTTT	3	0	0	0	0	0	0	3	0.01	0.01	0.01	0.01	0.01	0.01	0.6124
miR-6992-x	18	GACGGTTTGGCCGAGTGG	3	0	0	0	0	0	0	3	0.01	0.01	0.01	0.01	0.01	0.01	0.6124
miR-7063-x	18	CTGCATGCTGAGCACAAG	3	0	3	0	0	0	0	0	0.01	0.4669	0.01	0.01	0.01	0.01	0.01
miR-8881-y	18	TTTTCTCTGCTTCTGGAC	2	0	2	0	0	0	0	0	0.01	0.3113	0.01	0.01	0.01	0.01	0.01
miR-3686-y	18	TAAGAGAAAGTCACTGAA	2	2	0	0	0	0	0	0	0.4784	0.01	0.01	0.01	0.01	0.01	0.01
miR-592-x	23	TTGTGTCAATATGCGATGATGTT	2	2	0	0	0	0	0	0	0.4784	0.01	0.01	0.01	0.01	0.01	0.01
miR-758-x	22	TGGTTGACCAGAGAGCACACGA	2	2	0	0	0	0	0	0	0.4784	0.01	0.01	0.01	0.01	0.01	0.01
miR-190-y	18	AACTGAATGACAAACATA	2	0	2	0	0	0	0	0	0.01	0.3113	0.01	0.01	0.01	0.01	0.01
miR-6333-y	18	AGCCTGGACTTGGACAGC	2	0	0	2	0	0	0	0	0.01	0.01	0.5033	0.01	0.01	0.01	0.01
miR-9164-y	19	GGCTCAGCTCTGTAGCTGC	2	0	2	0	0	0	0	0	0.01	0.3113	0.01	0.01	0.01	0.01	0.01
miR-874-x	24	CGGCCCCACGCACCAGGGTAAGAT	2	0	0	0	2	0	0	0	0.01	0.01	0.01	0.2376	0.01	0.01	0.01
miR-4035-y	19	CAGATACTGTGACAGTGCA	2	0	0	2	0	0	0	0	0.01	0.01	0.5033	0.01	0.01	0.01	0.01
miR-7565-x	21	TTCCTGCTGAACTGAGCCAGT	2	0	2	0	0	0	0	0	0.01	0.3113	0.01	0.01	0.01	0.01	0.01
miR-7422-x	18	GTGCTGATGGAGTCGCTT	2	0	2	0	0	0	0	0	0.01	0.3113	0.01	0.01	0.01	0.01	0.01
miR-736-y	22	ATAAGACGAACAAAAAGTTTGT	2	2	0	0	0	0	0	0	0.4784	0.01	0.01	0.01	0.01	0.01	0.01
miR-4324-y	21	TCCCTGAGACCCTAACCTTGA	2	0	0	0	0	0	0	2	0.01	0.01	0.01	0.01	0.01	0.01	0.4083
miR-3620-x	20	CTGGGCTGGGCTGGGCTGGG	2	0	0	0	2	0	0	0	0.01	0.01	0.01	0.2376	0.01	0.01	0.01
miR-6920-x	20	TAAACAATGGAAAGACTGCT	2	0	2	0	0	0	0	0	0.01	0.3113	0.01	0.01	0.01	0.01	0.01
miR-3074-x	21	TTCCTGCTGAACTGAGCCAGT	2	0	2	0	0	0	0	0	0.01	0.3113	0.01	0.01	0.01	0.01	0.01
miR-7347-x	19	AATTGAGTCAACATGTAGT	2	0	2	0	0	0	0	0	0.01	0.3113	0.01	0.01	0.01	0.01	0.01
miR-8791-x	18	GGTGTCCTCTCCCCTCCC	2	0	2	0	0	0	0	0	0.01	0.3113	0.01	0.01	0.01	0.01	0.01
miR-2354-x	19	TAGTAGGTTGTGTGGTTAA	2	0	0	0	0	0	0	2	0.01	0.01	0.01	0.01	0.01	0.01	0.4083
miR-1927-y	18	CCCCAGGATGTTAGGGAC	2	0	0	2	0	0	0	0	0.01	0.01	0.5033	0.01	0.01	0.01	0.01
miR-8966-y	18	TGGGGACCATCTCTGCCC	2	0	2	0	0	0	0	0	0.01	0.3113	0.01	0.01	0.01	0.01	0.01
miR-2992-x	18	GGCAGGACCAAGTATCTC	2	0	2	0	0	0	0	0	0.01	0.3113	0.01	0.01	0.01	0.01	0.01
miR-5346-y	18	TAAGAAACTCAAGCCATC	2	0	2	0	0	0	0	0	0.01	0.3113	0.01	0.01	0.01	0.01	0.01
miR-7334-x	18	TCGCTGTGATGAATTTTT	2	0	0	0	0	0	0	2	0.01	0.01	0.01	0.01	0.01	0.01	0.4083
miR-5693-y	18	AACTCTGAAATGAACTCA	2	0	2	0	0	0	0	0	0.01	0.3113	0.01	0.01	0.01	0.01	0.01
miR-7294-x	18	GAAGCAACAGTTAGAACT	2	0	2	0	0	0	0	0	0.01	0.3113	0.01	0.01	0.01	0.01	0.01
miR-295-y	18	TACTACTTCAGAGTCTCT	2	0	0	2	0	0	0	0	0.01	0.01	0.5033	0.01	0.01	0.01	0.01
miR-2781-x	18	TGTTAGAGTGAAGGAGTT	2	2	0	0	0	0	0	0	0.4784	0.01	0.01	0.01	0.01	0.01	0.01
miR-598-y	18	ATCGTCGCCATCCTTATC	2	0	2	0	0	0	0	0	0.01	0.3113	0.01	0.01	0.01	0.01	0.01
miR-2331-x	23	GGCTTCTGTGCCTGCAGATGTCT	2	0	0	0	0	0	2	0	0.01	0.01	0.01	0.01	0.01	0.2511	0.01
miR-9280-y	18	TCCGACTCTGCCACCCCA	2	0	2	0	0	0	0	0	0.01	0.3113	0.01	0.01	0.01	0.01	0.01
miR-4639-x	18	TAAACAGGCTGAGATTGA	2	0	0	2	0	0	0	0	0.01	0.01	0.5033	0.01	0.01	0.01	0.01
miR-2332-y	22	GTTTAAGGTCTTGGAGACACAG	2	0	0	0	0	0	0	2	0.01	0.01	0.01	0.01	0.01	0.01	0.4083
miR-1890-y	20	CATGAAATCTTTGATAAGTT	2	0	2	0	0	0	0	0	0.01	0.3113	0.01	0.01	0.01	0.01	0.01
miR-4482-y	18	ATTTCTATTTCTAAGCGG	2	0	2	0	0	0	0	0	0.01	0.3113	0.01	0.01	0.01	0.01	0.01
miR-3880-x	18	GAAAAGAAAGAATTCTGC	2	0	0	2	0	0	0	0	0.01	0.01	0.5033	0.01	0.01	0.01	0.01
miR-1596-y	19	AAGGTGGCCGTAGGTGAAC	2	0	0	0	0	2	0	0	0.01	0.01	0.01	0.01	0.2065	0.01	0.01
miR-4459-x	18	AGGAGGAGGAGGAGGCGG	2	0	0	0	0	2	0	0	0.01	0.01	0.01	0.01	0.2065	0.01	0.01
miR-8485-y	18	ACACACACACACACACAC	2	0	2	0	0	0	0	0	0.01	0.3113	0.01	0.01	0.01	0.01	0.01
miR-6708-x	18	AGGAGCGGTGAGCAAAAG	2	0	2	0	0	0	0	0	0.01	0.3113	0.01	0.01	0.01	0.01	0.01
miR-308-x	18	CTCGCATTATATTTCTGT	2	2	0	0	0	0	0	0	0.4784	0.01	0.01	0.01	0.01	0.01	0.01
miR-2491-y	21	AACAACAACAGCAGCAGCAGC	2	0	2	0	0	0	0	0	0.01	0.3113	0.01	0.01	0.01	0.01	0.01
miR-306-y	20	TTGAGGGTTGCTCTGTGACT	2	0	0	2	0	0	0	0	0.01	0.01	0.5033	0.01	0.01	0.01	0.01
miR-3160-y	18	GAGACTAGGCAGCCCAGG	2	0	2	0	0	0	0	0	0.01	0.3113	0.01	0.01	0.01	0.01	0.01
miR-4785-y	20	AGAGTCCGCGGCGCCGCCAG	2	0	0	2	0	0	0	0	0.01	0.01	0.5033	0.01	0.01	0.01	0.01
miR-8198-y	18	AATGACGGAAACTGTTCA	2	0	0	2	0	0	0	0	0.01	0.01	0.5033	0.01	0.01	0.01	0.01
miR-9000-x	18	GACCCCGTGGCGCAATGG	2	0	0	0	0	0	0	2	0.01	0.01	0.01	0.01	0.01	0.01	0.4083
miR-632-y	18	ATGTTTCCTGTGGGACGC	2	0	2	0	0	0	0	0	0.01	0.3113	0.01	0.01	0.01	0.01	0.01
miR-3056-x	18	AGACATTATCTGAAAATA	2	2	0	0	0	0	0	0	0.4784	0.01	0.01	0.01	0.01	0.01	0.01
miR-1594-x	19	GGGGATGGGGTGGGGTGGG	2	0	0	0	2	0	0	0	0.01	0.01	0.01	0.2376	0.01	0.01	0.01
miR-1843-x	20	ACATGGAGGTCTCTGTCTGA	2	0	0	0	0	0	2	0	0.01	0.01	0.01	0.01	0.01	0.2511	0.01
miR-763-x	18	GCCGGGAAGAACCACTGG	2	0	0	2	0	0	0	0	0.01	0.01	0.5033	0.01	0.01	0.01	0.01
miR-2261-y	18	TAGGCATCTCATGAACGA	2	0	0	2	0	0	0	0	0.01	0.01	0.5033	0.01	0.01	0.01	0.01
miR-3375-y	18	ATTTTTGAAAAGTTTGGA	2	2	0	0	0	0	0	0	0.4784	0.01	0.01	0.01	0.01	0.01	0.01
miR-6528-x	18	GGGAGAGGGAGGGAGGGA	2	0	0	0	0	0	0	2	0.01	0.01	0.01	0.01	0.01	0.01	0.4083
miR-1562-x	18	CTGCACTGTAGGTGGAAG	2	0	0	2	0	0	0	0	0.01	0.01	0.5033	0.01	0.01	0.01	0.01
miR-8404-x	20	TGAACGTTGATTTATTTGGA	2	0	0	0	0	0	0	2	0.01	0.01	0.01	0.01	0.01	0.01	0.4083
miR-504-y	23	AGGGAGCGCAGGGCAGGGTTTCT	2	0	0	2	0	0	0	0	0.01	0.01	0.5033	0.01	0.01	0.01	0.01
miR-2375-y	19	GATGCAGAGGACTGATCAT	2	0	2	0	0	0	0	0	0.01	0.3113	0.01	0.01	0.01	0.01	0.01
miR-84-x	19	TGAGGTAGTTTGTATTGTT	2	0	0	0	0	0	2	0	0.01	0.01	0.01	0.01	0.01	0.2511	0.01
miR-4507-y	20	CTGGGCTGGGCTGGGCTGGG	2	0	0	0	2	0	0	0	0.01	0.01	0.01	0.2376	0.01	0.01	0.01
miR-222-x	24	GGCTCAGTAGCCAGTGTAGATCCA	2	0	0	2	0	0	0	0	0.01	0.01	0.5033	0.01	0.01	0.01	0.01
miR-6808-x	18	GCCGGGCAGGGAGGAGGG	2	0	0	0	0	0	2	0	0.01	0.01	0.01	0.01	0.01	0.2511	0.01
miR-5423-y	18	TTAAGAAGACTGTAGGAT	2	0	0	2	0	0	0	0	0.01	0.01	0.5033	0.01	0.01	0.01	0.01
miR-311-y	21	TATTGCACTTGTACCGGACTG	2	2	0	0	0	0	0	0	0.4784	0.01	0.01	0.01	0.01	0.01	0.01
miR-2330-y	20	ACTCCTTACCCCTGGCCGTC	2	0	2	0	0	0	0	0	0.01	0.3113	0.01	0.01	0.01	0.01	0.01
miR-6936-y	19	GGCGGCGCGCGCGGGCGCT	2	0	2	0	0	0	0	0	0.01	0.3113	0.01	0.01	0.01	0.01	0.01
miR-877-y	23	TCCTCTTCTCCCTCCTCCCAGTA	2	0	0	2	0	0	0	0	0.01	0.01	0.5033	0.01	0.01	0.01	0.01
miR-290-x	23	ACTCAAACTGTGGGGGCACTTAT	2	2	0	0	0	0	0	0	0.4784	0.01	0.01	0.01	0.01	0.01	0.01
miR-9883-x	18	TTCGGTCGGGCTGGGGCG	2	0	0	0	0	0	2	0	0.01	0.01	0.01	0.01	0.01	0.2511	0.01
miR-8464-x	20	TCTGTGTGAATATTTTTAGC	2	0	0	2	0	0	0	0	0.01	0.01	0.5033	0.01	0.01	0.01	0.01
miR-4634-x	18	CGGCGCGATCGGCCGGGG	2	0	2	0	0	0	0	0	0.01	0.3113	0.01	0.01	0.01	0.01	0.01
miR-9189-x	19	CCTGACTGGGGATTGAATC	2	0	2	0	0	0	0	0	0.01	0.3113	0.01	0.01	0.01	0.01	0.01
miR-7847-y	18	AGGAGGAGGAGGAGGCGG	2	0	0	0	0	2	0	0	0.01	0.01	0.01	0.01	0.2065	0.01	0.01
miR-1322-y	18	GATGAACCTGCTGATGCT	2	0	0	2	0	0	0	0	0.01	0.01	0.5033	0.01	0.01	0.01	0.01
miR-3750-x	18	TACATCAGCAGGACTGGA	2	2	0	0	0	0	0	0	0.4784	0.01	0.01	0.01	0.01	0.01	0.01
miR-2994-x	18	AGCGTCGGGCCCATCCCC	2	0	2	0	0	0	0	0	0.01	0.3113	0.01	0.01	0.01	0.01	0.01
miR-6803-y	18	CCTCCCCTTCTTACCCTC	2	0	2	0	0	0	0	0	0.01	0.3113	0.01	0.01	0.01	0.01	0.01
miR-8-y	22	TAACACTGTCAGGTAACGATGA	2	0	0	2	0	0	0	0	0.01	0.01	0.5033	0.01	0.01	0.01	0.01
miR-4723-x	18	GTGAGCCATGAGCTAAGA	2	0	0	2	0	0	0	0	0.01	0.01	0.5033	0.01	0.01	0.01	0.01
miR-5848-y	18	AGGACAAACATGAACATT	2	2	0	0	0	0	0	0	0.4784	0.01	0.01	0.01	0.01	0.01	0.01
miR-2976-x	22	CGGAGCGGAGCGGAGCGGCGGT	2	0	2	0	0	0	0	0	0.01	0.3113	0.01	0.01	0.01	0.01	0.01
miR-1668-x	18	GTGGGCTTGGAACACAGG	2	0	0	2	0	0	0	0	0.01	0.01	0.5033	0.01	0.01	0.01	0.01
miR-6521-y	23	GTGGTGCCAGCTCTGAGCAGAGT	2	0	2	0	0	0	0	0	0.01	0.3113	0.01	0.01	0.01	0.01	0.01
miR-7214-x	18	TGGTTTGGAATGAGAATT	2	0	2	0	0	0	0	0	0.01	0.3113	0.01	0.01	0.01	0.01	0.01
miR-876-y	22	TGGTGGTTTACAAAGTAATTCT	2	2	0	0	0	0	0	0	0.4784	0.01	0.01	0.01	0.01	0.01	0.01
miR-1926-y	18	CTAGGAGTTCTAAAGCAA	2	2	0	0	0	0	0	0	0.4784	0.01	0.01	0.01	0.01	0.01	0.01
miR-646-y	19	AACAGCTGCCTCGGAGGCC	2	0	0	2	0	0	0	0	0.01	0.01	0.5033	0.01	0.01	0.01	0.01
miR-6700-x	18	TGGAATTGTTCAGGAGAC	2	2	0	0	0	0	0	0	0.4784	0.01	0.01	0.01	0.01	0.01	0.01
miR-1951-y	18	GTGGAGACAGGTGTGTCT	2	0	2	0	0	0	0	0	0.01	0.3113	0.01	0.01	0.01	0.01	0.01
miR-202-y	21	AGAGGTGTAGGGCATGGGAAT	2	2	0	0	0	0	0	0	0.4784	0.01	0.01	0.01	0.01	0.01	0.01
miR-3917-y	20	GCTCGGACGGAGCAGGTGGG	2	0	2	0	0	0	0	0	0.01	0.3113	0.01	0.01	0.01	0.01	0.01
miR-1648-y	18	GTGGGAGTGGAGTGGAGC	2	0	2	0	0	0	0	0	0.01	0.3113	0.01	0.01	0.01	0.01	0.01
miR-1969-x	18	GAAGATGGAGACCATAAC	2	0	2	0	0	0	0	0	0.01	0.3113	0.01	0.01	0.01	0.01	0.01
miR-8908-y	22	AATCAGTATCTGTCTGGGTAGA	2	0	2	0	0	0	0	0	0.01	0.3113	0.01	0.01	0.01	0.01	0.01
miR-6756-y	18	TCCCCTTCCTCCCTCACC	2	0	2	0	0	0	0	0	0.01	0.3113	0.01	0.01	0.01	0.01	0.01
miR-3317-y	19	AGGAATGCTGTGATAAGCC	2	2	0	0	0	0	0	0	0.4784	0.01	0.01	0.01	0.01	0.01	0.01
miR-6840-x	18	CGGGCAAAGGCCTGCAGC	2	0	2	0	0	0	0	0	0.01	0.3113	0.01	0.01	0.01	0.01	0.01
miR-5683-x	18	AGATCCAGATTTTCTGAC	2	0	2	0	0	0	0	0	0.01	0.3113	0.01	0.01	0.01	0.01	0.01
miR-1417-y	22	CATTTCACCGGCTCTGAGAGCA	2	0	0	0	0	0	0	2	0.01	0.01	0.01	0.01	0.01	0.01	0.4083
miR-4490-y	18	TGGTATGAGATCTGGGCA	2	0	0	0	0	0	0	2	0.01	0.01	0.01	0.01	0.01	0.01	0.4083
miR-19-x	25	AGTTTTGCAGGTTTGCATCCAGCAT	2	0	0	0	0	2	0	0	0.01	0.01	0.01	0.01	0.2065	0.01	0.01
miR-7064-x	18	AGAGGCATGAAAGTCATT	2	0	2	0	0	0	0	0	0.01	0.3113	0.01	0.01	0.01	0.01	0.01
miR-1587-x	19	GGGGCTGGGCTGGGTCGGG	2	0	0	0	0	2	0	0	0.01	0.01	0.01	0.01	0.2065	0.01	0.01
miR-1497-y	18	TTTGAAGAATGACAGGTA	2	0	2	0	0	0	0	0	0.01	0.3113	0.01	0.01	0.01	0.01	0.01
miR-449-y	18	GTAGAACTTGGTCCCAAC	2	2	0	0	0	0	0	0	0.4784	0.01	0.01	0.01	0.01	0.01	0.01
miR-4064-y	18	GACAACTGGTAACCCTGT	2	2	0	0	0	0	0	0	0.4784	0.01	0.01	0.01	0.01	0.01	0.01
miR-4712-y	19	AATGAAAGACCTGTACTCT	2	0	2	0	0	0	0	0	0.01	0.3113	0.01	0.01	0.01	0.01	0.01
miR-2885-y	18	CGGCGGGGGCGCCGGGGC	2	0	2	0	0	0	0	0	0.01	0.3113	0.01	0.01	0.01	0.01	0.01
miR-3969-x	23	CCCATAAAGTAGAAAGCACTATA	2	0	0	0	0	0	0	2	0.01	0.01	0.01	0.01	0.01	0.01	0.4083
miR-3586-y	21	TTCTAGACTGTGAGCTCCTCA	2	0	0	2	0	0	0	0	0.01	0.01	0.5033	0.01	0.01	0.01	0.01
miR-8447-y	19	GACATTGATGAGTGTGTGA	2	0	0	0	0	0	0	2	0.01	0.01	0.01	0.01	0.01	0.01	0.4083
miR-9170-y	18	TTGCATTATGGCTCTCCC	2	0	2	0	0	0	0	0	0.01	0.3113	0.01	0.01	0.01	0.01	0.01
miR-6605-x	18	CAGAGCCTCTTGAGCAAG	2	2	0	0	0	0	0	0	0.4784	0.01	0.01	0.01	0.01	0.01	0.01
miR-3714-x	18	GAAGGCAGCGGAGCTCCC	2	0	2	0	0	0	0	0	0.01	0.3113	0.01	0.01	0.01	0.01	0.01
miR-7412-x	18	TCTGGAGAAGACAGGACA	2	0	0	2	0	0	0	0	0.01	0.01	0.5033	0.01	0.01	0.01	0.01
miR-141-x	22	CATCTTCCAGCGCAGTGTTGGA	2	0	0	0	2	0	0	0	0.01	0.01	0.01	0.2376	0.01	0.01	0.01
miR-7400-y	18	TGAACCTGCGGGAGCCCT	2	0	2	0	0	0	0	0	0.01	0.3113	0.01	0.01	0.01	0.01	0.01
miR-706-x	18	AGCGAGACCCTGTCTCAA	2	0	0	0	0	2	0	0	0.01	0.01	0.01	0.01	0.2065	0.01	0.01
miR-3064-y	21	TTGCCACACTGCAACACCTTA	2	0	0	2	0	0	0	0	0.01	0.01	0.5033	0.01	0.01	0.01	0.01
miR-733-x	18	GTGGGTATAGCTCAGTGG	2	0	0	0	0	0	2	0	0.01	0.01	0.01	0.01	0.01	0.2511	0.01
miR-2201-x	18	TGAAGAAGCTACTGCTGA	2	2	0	0	0	0	0	0	0.4784	0.01	0.01	0.01	0.01	0.01	0.01
miR-9082-x	18	CTCTCTCAACCCTCCGAC	2	2	0	0	0	0	0	0	0.4784	0.01	0.01	0.01	0.01	0.01	0.01
miR-2305-x	18	GGGGGTGGCGGGGGTGGG	2	0	0	0	0	0	2	0	0.01	0.01	0.01	0.01	0.01	0.2511	0.01
miR-2330-x	20	ATGGGCTTGGGCAGTGAGGA	2	0	0	0	0	2	0	0	0.01	0.01	0.01	0.01	0.2065	0.01	0.01
miR-9240-y	19	CGGTGAACCTGGGCAAGCT	2	0	0	0	0	2	0	0	0.01	0.01	0.01	0.01	0.2065	0.01	0.01
miR-3198-y	18	TCCTGGGGAAGGGAGAGC	2	0	2	0	0	0	0	0	0.01	0.3113	0.01	0.01	0.01	0.01	0.01
miR-2733-y	18	ACTGGGAATGGAATTGCT	2	0	0	2	0	0	0	0	0.01	0.01	0.5033	0.01	0.01	0.01	0.01
miR-2888-y	18	GGGGTGGGGGTGGGGGGT	2	0	0	0	0	0	0	2	0.01	0.01	0.01	0.01	0.01	0.01	0.4083
miR-2131-x	20	GCAGAAGAGCACAGAAACTG	2	0	2	0	0	0	0	0	0.01	0.3113	0.01	0.01	0.01	0.01	0.01
miR-993-y	23	GAAGCTCGTCTCTACAGGTATCT	2	0	0	0	2	0	0	0	0.01	0.01	0.01	0.2376	0.01	0.01	0.01
miR-9343-y	18	GAGAACTGATAGCAAGCT	2	0	2	0	0	0	0	0	0.01	0.3113	0.01	0.01	0.01	0.01	0.01
miR-1694-y	19	GGAGGCCGAGGCTGCAAGC	2	0	2	0	0	0	0	0	0.01	0.3113	0.01	0.01	0.01	0.01	0.01
miR-6724-x	18	GGCGCGGGGCGGGCGTGG	2	0	0	0	0	2	0	0	0.01	0.01	0.01	0.01	0.2065	0.01	0.01
miR-1019-y	18	GTAATTCCAGATAGCTTT	2	0	2	0	0	0	0	0	0.01	0.3113	0.01	0.01	0.01	0.01	0.01
miR-5124-x	18	GGGTCAAGTGACTAAGTG	2	2	0	0	0	0	0	0	0.4784	0.01	0.01	0.01	0.01	0.01	0.01
miR-1304-y	18	ATCTCACTGGAGCCTCCA	2	0	0	0	0	0	0	2	0.01	0.01	0.01	0.01	0.01	0.01	0.4083
miR-6873-y	19	CTGTCTCTGTCTTTCTCTC	2	0	0	2	0	0	0	0	0.01	0.01	0.5033	0.01	0.01	0.01	0.01
miR-7646-x	20	AACAGACCTGATCAGTGCTG	2	0	0	2	0	0	0	0	0.01	0.01	0.5033	0.01	0.01	0.01	0.01
miR-6006-x	19	AAATAACTTTGAAGAGAGA	2	0	0	0	0	0	0	2	0.01	0.01	0.01	0.01	0.01	0.01	0.4083
miR-4155-y	18	ATGCTCAGAGTCTAAAAT	2	0	0	2	0	0	0	0	0.01	0.01	0.5033	0.01	0.01	0.01	0.01
miR-4600-x	18	CGTCGCCCGCGTTCCCCC	2	0	2	0	0	0	0	0	0.01	0.3113	0.01	0.01	0.01	0.01	0.01
bantam-y	23	TGAGATCATTTTGAAAGCTGATT	2	0	2	0	0	0	0	0	0.01	0.3113	0.01	0.01	0.01	0.01	0.01
miR-2186-y	18	AGAAGTGGCCTTTAAAAA	2	2	0	0	0	0	0	0	0.4784	0.01	0.01	0.01	0.01	0.01	0.01
miR-2451-y	18	GGTTCTCTGAAGAGTGGA	2	0	2	0	0	0	0	0	0.01	0.3113	0.01	0.01	0.01	0.01	0.01
miR-6557-x	18	CTGAGGAGCCCGGAGCTG	2	0	0	0	0	0	2	0	0.01	0.01	0.01	0.01	0.01	0.2511	0.01
novel-m0033-5p	24	AACTTTTGCCCCTAGTAACGGACT	53914	14551	16027	5244	8958	6529	2127	478	3480.51	2494.34	1319.58	1064.31	674.077	267.06	97.5757
novel-m0098-5p	22	GATGAGGCTCAGCGAGCCCTGG	1473	34	46	33	369	384	374	233	8.1326	7.1592	8.304	43.8415	39.6455	46.9583	47.563
novel-m0112-3p	22	TCACTGGGCATCCTCTGCTTTA	1434	418	343	108	218	182	107	58	99.9831	53.3824	27.1767	25.9009	18.7903	13.4346	11.8397
novel-m0093-5p	22	GATGAGGCTCAGCGAGCCCTGG	1264	28	17	24	320	339	337	199	6.6974	2.6458	6.0393	38.0197	34.9995	42.3127	40.6225
novel-m0046-5p	23	TCTGGTGCTTAGACTCTGTGCTT	477	14	16	10	126	118	123	70	3.3487	2.4901	2.5164	14.9703	12.1827	15.4435	14.2893
novel-m0029-3p	23	CACTGGAGTTTTGTTTCAACATT	469	102	285	25	13	39	3	2	24.3978	44.3556	6.2909	1.5446	4.0265	0.3767	0.4083
novel-m0069-5p	20	CCCTCCCCGGCCCCCTCCCC	394	0	2	0	69	55	228	40	0.01	0.3113	0.01	8.198	5.6784	28.627	8.1653
novel-m0041-3p	20	GGCGGCGGCGCGCGCGGGCG	357	0	0	0	37	63	157	100	0.01	0.01	0.01	4.396	6.5043	19.7125	20.4133
novel-m0108-5p	23	AACAGCGTGGATTTCAGTTGGCT	343	27	63	25	53	74	60	41	6.4582	9.8049	6.2909	6.297	7.64	7.5334	8.3695
novel-m0127-5p	22	TAGAGAAGCACTGGGGGAAAGT	318	56	80	41	59	44	21	17	13.3949	12.4507	10.3171	7.0099	4.5427	2.6367	3.4703
novel-m0024-3p	23	TGGAGCCGGAGCTGGTTAGCGGC	314	9	4	2	9	37	136	117	2.1527	0.6225	0.5033	1.0693	3.82	17.0758	23.8836
novel-m0088-5p	22	ATAAGTTCATTCGGAGTTGTCC	279	82	71	37	26	27	28	8	19.6139	11.05	9.3105	3.0891	2.7876	3.5156	1.6331
novel-m0102-3p	22	CGTCGGTGATGTTCTGCAATTA	245	3	2	0	2	23	2	213	0.7176	0.3113	0.01	0.2376	2.3746	0.2511	43.4804
novel-m0131-3p	20	GTCTGGTGGGAAGGAAGGGA	223	19	26	2	67	55	39	15	4.5447	4.0465	0.5033	7.9604	5.6784	4.8967	3.062
novel-m0088-3p	22	GAAAACTCTGAATGAACTTTAT	215	72	30	42	26	15	21	9	17.222	4.669	10.5687	3.0891	1.5487	2.6367	1.8372
novel-m0061-5p	22	AACAGTCTGTTCAGGTTTTCCT	212	66	71	26	17	12	12	8	15.7868	11.05	6.5425	2.0198	1.2389	1.5067	1.6331
novel-m0134-5p	23	TTCTCCATTGGATATAATAGTCA	210	8	21	15	26	55	53	32	1.9136	3.2683	3.7745	3.0891	5.6784	6.6545	6.5323
novel-m0065-5p	23	CCCAGGGATGTAGCTCCTAGTGC	193	4	6	0	49	62	50	22	0.9568	0.9338	0.01	5.8218	6.4011	6.2779	4.4909
novel-m0049-3p	23	CTCTGCCCGCTCTCTGTCTTACA	188	24	17	3	40	36	42	26	5.7407	2.6458	0.7549	4.7525	3.7168	5.2734	5.3075
novel-m0112-5p	22	AAGTACAGGATGCCCAATGAAT	183	62	51	17	20	22	8	3	14.83	7.9373	4.2778	2.3762	2.2714	1.0045	0.6124
novel-m0089-5p	22	TTCTTGACTGCTCACCTGGGCT	180	49	61	29	25	11	5	0	11.7205	9.4937	7.2975	2.9703	1.1357	0.6278	0.01
novel-m0005-3p	21	TTCCAATGATGACTTCTTATT	175	6	13	10	0	0	3	143	1.4352	2.0232	2.5164	0.01	0.01	0.3767	29.191
novel-m0033-3p	20	TCCGTGCAGGAGGCAAAGCA	145	43	32	4	31	29	6	0	10.2853	4.9803	1.0065	3.6832	2.9941	0.7533	0.01
novel-m0084-5p	21	AGTAACAGCATCTCCACTGGA	130	0	4	0	32	47	36	11	0.01	0.6225	0.01	3.802	4.8524	4.5201	2.2455
novel-m0129-5p	21	TTGTTGTCAGGAGTCACTGCT	120	21	17	9	32	17	14	10	5.0231	2.6458	2.2647	3.802	1.7551	1.7578	2.0413
novel-m0021-3p	22	AAAAACCTGAATGACACTTTTG	112	33	58	15	0	4	2	0	7.8934	9.0268	3.7745	0.01	0.413	0.2511	0.01
novel-m0100-3p	22	TCAGCACCATCCTTCCCTGGCA	105	3	11	0	19	15	28	29	0.7176	1.712	0.01	2.2574	1.5487	3.5156	5.9199
novel-m0056-5p	23	TGTTTGACATGAGAGCTTCCAGA	103	6	17	2	27	25	10	16	1.4352	2.6458	0.5033	3.2079	2.5811	1.2556	3.2661
novel-m0110-3p	23	TCGCAACACAGTTCCAACCGAGA	89	10	10	5	19	19	17	9	2.3919	1.5563	1.2582	2.2574	1.9616	2.1345	1.8372
novel-m0115-5p	22	GTAGGGACCTCTCATGTCTGTG	87	5	10	5	15	15	26	11	1.196	1.5563	1.2582	1.7822	1.5487	3.2645	2.2455
novel-m0020-5p	22	AAATGTTCGCTTGAGTTTTTCT	83	11	17	4	11	12	20	8	2.6311	2.6458	1.0065	1.3069	1.2389	2.5111	1.6331
novel-m0137-5p	24	TCTGCTGACTTTGAAGGTGGAAGC	80	2	0	0	12	15	27	24	0.4784	0.01	0.01	1.4257	1.5487	3.39	4.8992
novel-m0109-3p	22	TGGGACATGTCAGGGCCTGGCT	79	11	16	0	16	5	25	6	2.6311	2.4901	0.01	1.901	0.5162	3.1389	1.2248
novel-m0121-3p	22	TTTTTTGCTGGAACATTTCTGG	76	0	2	0	2	24	21	27	0.01	0.3113	0.01	0.2376	2.4778	2.6367	5.5116
novel-m0131-5p	21	AGCCCTTCCCTTTCACTGGCC	65	15	19	2	7	17	2	3	3.5879	2.957	0.5033	0.8317	1.7551	0.2511	0.6124
novel-m0118-5p	21	GGGGGGGCCGGGGCCGGGGGC	64	0	0	0	0	16	48	0	0.01	0.01	0.01	0.01	1.6519	6.0267	0.01
novel-m0086-3p	22	TGCTCTGAGGAGCCAGCCCAGA	63	0	0	0	14	22	19	8	0.01	0.01	0.01	1.6634	2.2714	2.3856	1.6331
novel-m0030-3p	23	AGAGGTGGGCGTGCCGGCTCAGA	60	0	0	0	15	15	23	7	0.01	0.01	0.01	1.7822	1.5487	2.8878	1.4289
novel-m0042-3p	21	TATGAAGTCCTTAAGGGGAGG	59	2	0	0	10	16	20	11	0.4784	0.01	0.01	1.1881	1.6519	2.5111	2.2455
novel-m0038-3p	21	TATGAAGTCCTTAAGGGGAGG	59	2	0	0	10	16	20	11	0.4784	0.01	0.01	1.1881	1.6519	2.5111	2.2455
novel-m0084-3p	22	CACATGGAGTTGCTGTTACAAT	58	10	13	5	9	9	8	4	2.3919	2.0232	1.2582	1.0693	0.9292	1.0045	0.8165
novel-m0111-3p	23	TTGGACACTTCAGTACTGCTACA	56	4	4	3	8	7	25	5	0.9568	0.6225	0.7549	0.9505	0.7227	3.1389	1.0207
novel-m0076-5p	22	AGTTGAGGCTCCGAGCTTTGGT	55	0	3	0	19	7	16	10	0.01	0.4669	0.01	2.2574	0.7227	2.0089	2.0413
novel-m0027-5p	20	GGGCGCGCGCCGCGGCTGGA	51	0	0	0	12	10	12	17	0.01	0.01	0.01	1.4257	1.0324	1.5067	3.4703
novel-m0039-3p	21	TCACTCAGTCGTGCCCGAATT	49	4	12	6	4	6	12	5	0.9568	1.8676	1.5098	0.4752	0.6195	1.5067	1.0207
novel-m0116-5p	24	CTGCAGTGATGCCGCATCTGAGCC	47	6	10	0	2	6	23	0	1.4352	1.5563	0.01	0.2376	0.6195	2.8878	0.01
novel-m0106-5p	22	GTCGGGGTCAGGTCGGCTTTTT	46	0	0	0	18	14	12	2	0.01	0.01	0.01	2.1386	1.4454	1.5067	0.4083
novel-m0127-3p	22	TGCCCCTTGATGCTTGTCTTCA	45	0	0	0	17	4	13	11	0.01	0.01	0.01	2.0198	0.413	1.6322	2.2455
novel-m0007-5p	21	GCCCTTTGAGGGTTTGGGTTT	44	21	17	6	0	0	0	0	5.0231	2.6458	1.5098	0.01	0.01	0.01	0.01
novel-m0078-3p	21	GTCACATGATGACTTCTGATG	42	13	8	8	3	6	4	0	3.1095	1.2451	2.0131	0.3564	0.6195	0.5022	0.01
novel-m0094-3p	21	GCGTCTCACTGAGCAGCATGT	40	28	8	2	2	0	0	0	6.6974	1.2451	0.5033	0.2376	0.01	0.01	0.01
novel-m0052-5p	22	TAGAAAGTTTCTTTGGGGTTTT	39	8	16	5	6	2	0	2	1.9136	2.4901	1.2582	0.7129	0.2065	0.01	0.4083
novel-m0035-5p	24	AGCCGAGCTCCGAGCTGTCCCTGG	36	11	14	0	7	2	2	0	2.6311	2.1789	0.01	0.8317	0.2065	0.2511	0.01
novel-m0135-5p	22	CAGGGAGGGCTGGGGGCTTGGG	36	0	0	0	0	6	14	16	0.01	0.01	0.01	0.01	0.6195	1.7578	3.2661
novel-m0096-3p	22	AAAACACAAACAAACTTTTCGG	35	0	5	5	5	8	10	2	0.01	0.7782	1.2582	0.5941	0.8259	1.2556	0.4083
novel-m0107-5p	22	GAGGCCATGATCATCCTTCTGT	35	17	13	5	0	0	0	0	4.0663	2.0232	1.2582	0.01	0.01	0.01	0.01
novel-m0028-3p	22	AAAACCTTGATGAACTTTTTGA	35	0	0	0	15	9	9	2	0.01	0.01	0.01	1.7822	0.9292	1.13	0.4083
novel-m0001-3p	22	GCGGCCCGCGGGCTCGGATGCT	33	2	0	0	13	5	11	2	0.4784	0.01	0.01	1.5446	0.5162	1.3811	0.4083
novel-m0051-5p	22	AAAGGTTCATTCAGGTTTTTTT	32	4	2	3	6	8	7	2	0.9568	0.3113	0.7549	0.7129	0.8259	0.8789	0.4083
novel-m0063-5p	22	AAAGGTTCATTCAGGTTTTTTT	32	4	2	3	6	8	7	2	0.9568	0.3113	0.7549	0.7129	0.8259	0.8789	0.4083
novel-m0016-3p	22	GGCCTGCACACGAGCATCAGCG	31	3	6	0	6	6	10	0	0.7176	0.9338	0.01	0.7129	0.6195	1.2556	0.01
novel-m0048-3p	22	TGGCCTCCGTGGGCCTCTCTGC	30	3	24	3	0	0	0	0	0.7176	3.7352	0.7549	0.01	0.01	0.01	0.01
novel-m0083-5p	23	GAAAGTGTAAGGCAAGGTCTGGT	28	0	2	2	7	3	6	8	0.01	0.3113	0.5033	0.8317	0.3097	0.7533	1.6331
novel-m0072-3p	22	CGCGTGCAGCCGCAGCCCGAGA	28	8	2	2	3	2	7	4	1.9136	0.3113	0.5033	0.3564	0.2065	0.8789	0.8165
novel-m0001-5p	25	CAGTCCGGTCCCGCGGTGTCTCCGC	27	9	11	0	4	0	0	3	2.1527	1.712	0.01	0.4752	0.01	0.01	0.6124
novel-m0055-3p	21	CCCGGCCCGGCGAGCGCCCTT	26	0	0	0	0	22	4	0	0.01	0.01	0.01	0.01	2.2714	0.5022	0.01
novel-m0068-3p	22	TTCGGCGCCGCGTTCTGCTCGC	26	12	3	7	2	0	2	0	2.8703	0.4669	1.7615	0.2376	0.01	0.2511	0.01
novel-m0023-5p	23	GCTGCATGTGACCGGCTTGCTGA	25	0	0	0	19	6	0	0	0.01	0.01	0.01	2.2574	0.6195	0.01	0.01
novel-m0124-5p	22	CGGAGGCCCCGTGGGGCAGAGG	25	0	3	2	5	4	7	4	0.01	0.4669	0.5033	0.5941	0.413	0.8789	0.8165
novel-m0017-5p	23	GCTGCATGTGACCGGCTTGCTGA	25	0	0	0	19	6	0	0	0.01	0.01	0.01	2.2574	0.6195	0.01	0.01
novel-m0085-3p	22	TTAGCCCTGACCGGTCGCTGGG	24	3	2	2	5	7	3	2	0.7176	0.3113	0.5033	0.5941	0.7227	0.3767	0.4083
novel-m0034-5p	22	TACTGTCCCAATGCCTGAGAGT	23	7	5	5	0	6	0	0	1.6744	0.7782	1.2582	0.01	0.6195	0.01	0.01
novel-m0031-3p	22	TACTGTCCCAATGCCTGAGAGT	23	7	5	5	0	6	0	0	1.6744	0.7782	1.2582	0.01	0.6195	0.01	0.01
novel-m0071-3p	23	AAAGGCCTGAATGAACTTTTTGA	23	3	2	4	3	7	4	0	0.7176	0.3113	1.0065	0.3564	0.7227	0.5022	0.01
novel-m0019-5p	23	TTAGAGCTACACTTGGCGTCTGT	22	0	2	2	3	3	10	2	0.01	0.3113	0.5033	0.3564	0.3097	1.2556	0.4083
novel-m0040-5p	23	CCTCACTGATGAGCAGCTTCTGA	21	0	0	0	0	0	0	21	0.01	0.01	0.01	0.01	0.01	0.01	4.2868
novel-m0044-5p	23	AAAAGTTCATTTGTGGTTTTTCT	21	9	4	0	3	2	3	0	2.1527	0.6225	0.01	0.3564	0.2065	0.3767	0.01
novel-m0133-3p	22	AAAACCTGAGTGAACTTTCTAG	20	2	18	0	0	0	0	0	0.4784	2.8014	0.01	0.01	0.01	0.01	0.01
novel-m0125-5p	20	GGGGGGCCGGGGCCGGGGGC	20	0	0	0	0	16	4	0	0.01	0.01	0.01	0.01	1.6519	0.5022	0.01
novel-m0090-5p	22	ACTGATGATGAGAAAACTGAGT	20	2	8	3	0	2	5	0	0.4784	1.2451	0.7549	0.01	0.2065	0.6278	0.01
novel-m0004-5p	24	TTCTCATTGGCCTCACGTCCTGTC	20	3	7	5	0	5	0	0	0.7176	1.0894	1.2582	0.01	0.5162	0.01	0.01
novel-m0079-3p	22	AAAACCTGAGCAAACTTTTTGT	20	5	8	7	0	0	0	0	1.196	1.2451	1.7615	0.01	0.01	0.01	0.01
novel-m0026-5p	23	CCAGGGCAGGATGGCTATCTCGG	20	0	0	0	7	3	5	5	0.01	0.01	0.01	0.8317	0.3097	0.6278	1.0207
novel-m0066-5p	22	AGTTGTAGACTGAATTTCAAGT	19	0	0	0	3	2	9	5	0.01	0.01	0.01	0.3564	0.2065	1.13	1.0207
novel-m0110-5p	22	CATCTGGTTGGTATGTTTTGCT	19	7	0	2	3	0	0	7	1.6744	0.01	0.5033	0.3564	0.01	0.01	1.4289
novel-m0114-5p	21	TATGACAGTGACCCCCTTTGA	18	5	2	0	2	7	2	0	1.196	0.3113	0.01	0.2376	0.7227	0.2511	0.01
novel-m0014-3p	22	AAAAATCTGCATGAACTTTGTG	18	0	0	2	2	0	8	6	0.01	0.01	0.5033	0.2376	0.01	1.0045	1.2248
novel-m0002-5p	23	TCCCCGAGTCCCTGGTGTGCACT	18	0	6	2	6	2	2	0	0.01	0.9338	0.5033	0.7129	0.2065	0.2511	0.01
novel-m0009-5p	20	CGCGAGGGGGCGGGGCGGGG	18	0	0	0	0	4	10	4	0.01	0.01	0.01	0.01	0.413	1.2556	0.8165
novel-m0062-3p	21	ACATCTCAGTCACTTTCTGTT	18	0	3	3	3	2	5	2	0.01	0.4669	0.7549	0.3564	0.2065	0.6278	0.4083
novel-m0054-5p	22	GAAAAAGTTGATTTAGGTTTTT	17	2	0	0	0	2	7	6	0.4784	0.01	0.01	0.01	0.2065	0.8789	1.2248
novel-m0092-3p	21	TCTGTTTCCCAGAACACGTGG	16	3	2	0	3	0	5	3	0.7176	0.3113	0.01	0.3564	0.01	0.6278	0.6124
novel-m0036-5p	22	AAATGTTTATTTGGGATTTTCT	16	6	4	6	0	0	0	0	1.4352	0.6225	1.5098	0.01	0.01	0.01	0.01
novel-m0130-3p	23	CCAGCCCTGCCGTGCTCTCGTCA	15	0	0	0	2	5	4	4	0.01	0.01	0.01	0.2376	0.5162	0.5022	0.8165
novel-m0006-5p	21	CGGGCCCGGGGGGTCGCGTCT	15	0	0	0	2	0	9	4	0.01	0.01	0.01	0.2376	0.01	1.13	0.8165
novel-m0128-3p	20	GGTGGACGGACGGACGCCGA	15	0	0	0	3	5	2	5	0.01	0.01	0.01	0.3564	0.5162	0.2511	1.0207
novel-m0010-3p	22	TTGGTTTTCAAGCCAGTTCTCT	15	3	7	5	0	0	0	0	0.7176	1.0894	1.2582	0.01	0.01	0.01	0.01
novel-m0064-5p	23	TAGTCTCCTGTTGTCACTGGTCT	14	3	0	0	2	4	2	3	0.7176	0.01	0.01	0.2376	0.413	0.2511	0.6124
novel-m0057-5p	22	TGAGTTAAAGGAAAAGGAAAGT	14	0	0	0	5	0	7	2	0.01	0.01	0.01	0.5941	0.01	0.8789	0.4083
novel-m0099-3p	21	AGCTTGAGTCCACCTACATAC	14	0	0	0	6	2	6	0	0.01	0.01	0.01	0.7129	0.2065	0.7533	0.01
novel-m0024-5p	22	CGCTGGCCCACCCCGATCCAGG	14	0	0	0	0	0	7	7	0.01	0.01	0.01	0.01	0.01	0.8789	1.4289
novel-m0105-3p	22	TCCCATCCTTGTGACCACGTCC	14	0	0	0	4	7	3	0	0.01	0.01	0.01	0.4752	0.7227	0.3767	0.01
novel-m0074-3p	22	TAGCGGAGATTGCCAAAGTAGA	13	4	4	0	0	3	2	0	0.9568	0.6225	0.01	0.01	0.3097	0.2511	0.01
novel-m0015-5p	22	ATGGCCAAAAGGTTTGTTCAGA	13	0	0	0	2	5	2	4	0.01	0.01	0.01	0.2376	0.5162	0.2511	0.8165
novel-m0136-3p	20	CCCCGGAGGCTGGCAAAGGT	13	0	0	0	0	13	0	0	0.01	0.01	0.01	0.01	1.3422	0.01	0.01
novel-m0013-3p	23	ACAGACCAGTCTGCTTCCCTTTT	12	0	0	0	5	7	0	0	0.01	0.01	0.01	0.5941	0.7227	0.01	0.01
novel-m0103-5p	21	CGGGGAGGATGGAGCCTGGCT	12	2	0	0	3	2	2	3	0.4784	0.01	0.01	0.3564	0.2065	0.2511	0.6124
novel-m0075-3p	22	AAAAACCCAGTGAACTTTTTGG	12	5	2	5	0	0	0	0	1.196	0.3113	1.2582	0.01	0.01	0.01	0.01
novel-m0111-5p	23	TGGCAGTCAGATATTGTTTAACA	12	4	4	0	0	0	4	0	0.9568	0.6225	0.01	0.01	0.01	0.5022	0.01
novel-m0011-3p	20	TTGCTGTATGAATAGCAGTT	12	2	3	2	3	0	0	2	0.4784	0.4669	0.5033	0.3564	0.01	0.01	0.4083
novel-m0002-3p	23	TGTACTCTGGGACTCGGGTGTCA	12	2	2	0	4	0	2	2	0.4784	0.3113	0.01	0.4752	0.01	0.2511	0.4083
novel-m0095-3p	22	AAAAACCCAGTGAACTTTTTGG	12	5	2	5	0	0	0	0	1.196	0.3113	1.2582	0.01	0.01	0.01	0.01
novel-m0122-3p	22	TGGTTTCAGGACAGATCTCTCC	11	0	4	4	3	0	0	0	0.01	0.6225	1.0065	0.3564	0.01	0.01	0.01
novel-m0060-5p	22	TGCGAGTTCGGTGGGATTTGCT	11	0	2	0	2	3	4	0	0.01	0.3113	0.01	0.2376	0.3097	0.5022	0.01
novel-m0097-3p	23	AAACTCAAATGAACTTTTTTGGT	11	3	8	0	0	0	0	0	0.7176	1.2451	0.01	0.01	0.01	0.01	0.01
novel-m0035-3p	22	TGGGCTGCCGCCGCTCGGCGCC	11	6	5	0	0	0	0	0	1.4352	0.7782	0.01	0.01	0.01	0.01	0.01
novel-m0073-3p	22	CTCTACAGCGCCTTGTCCATGC	11	2	0	0	2	2	3	2	0.4784	0.01	0.01	0.2376	0.2065	0.3767	0.4083
novel-m0119-3p	22	TGGTTTCAGGACAGATCTCTCC	11	0	4	4	3	0	0	0	0.01	0.6225	1.0065	0.3564	0.01	0.01	0.01
novel-m0067-3p	22	TGGAGCTGGAAGGCCTCGGTTT	11	0	0	0	0	2	7	2	0.01	0.01	0.01	0.01	0.2065	0.8789	0.4083
novel-m0037-3p	23	TCCGGCCCTGTGGGAGGAGTTCT	10	8	2	0	0	0	0	0	1.9136	0.3113	0.01	0.01	0.01	0.01	0.01
novel-m0087-3p	20	GGCGGCGGCGGCGCGCGCGG	10	0	0	0	0	3	5	2	0.01	0.01	0.01	0.01	0.3097	0.6278	0.4083
novel-m0050-3p	21	CTGCCTGGACCCCTGCTCACC	10	0	2	0	2	4	0	2	0.01	0.3113	0.01	0.2376	0.413	0.01	0.4083
novel-m0101-5p	21	TGTGCAATCCATGCAAAACTG	10	2	0	2	0	3	3	0	0.4784	0.01	0.5033	0.01	0.3097	0.3767	0.01
novel-m0070-3p	22	CTGCGCGGAGTCTGGAACTCGT	10	0	3	0	2	3	0	2	0.01	0.4669	0.01	0.2376	0.3097	0.01	0.4083
novel-m0082-3p	23	TACCCGACGAGAAGCGATAGTTT	10	10	0	0	0	0	0	0	2.3919	0.01	0.01	0.01	0.01	0.01	0.01
novel-m0032-3p	22	TCCAGACTGTCAGGCTTGGAGG	10	0	5	5	0	0	0	0	0.01	0.7782	1.2582	0.01	0.01	0.01	0.01
novel-m0123-5p	22	CCCTGCTGGCGACCACCTGACT	10	0	0	0	3	5	2	0	0.01	0.01	0.01	0.3564	0.5162	0.2511	0.01
novel-m0043-5p	21	TCCAACGGTGGAGGTAGGAAT	9	0	0	0	5	4	0	0	0.01	0.01	0.01	0.5941	0.413	0.01	0.01
novel-m0012-3p	22	CGGAGGCGGCGTTGGCCGCGGG	9	0	0	0	3	4	0	2	0.01	0.01	0.01	0.3564	0.413	0.01	0.4083
novel-m0018-3p	21	ATCGTGGAGCAAGAGTTCAGA	9	2	3	2	0	0	2	0	0.4784	0.4669	0.5033	0.01	0.01	0.2511	0.01
novel-m0053-3p	22	GAGAAACATGAATGAACTTTTG	9	5	4	0	0	0	0	0	1.196	0.6225	0.01	0.01	0.01	0.01	0.01
novel-m0117-5p	22	ATACACACACGTGCACACACTC	9	0	0	9	0	0	0	0	0.01	0.01	2.2647	0.01	0.01	0.01	0.01
novel-m0022-3p	21	ATCGTGGAGCAAGAGTTCAGA	9	2	3	2	0	0	2	0	0.4784	0.4669	0.5033	0.01	0.01	0.2511	0.01
novel-m0059-3p	22	TGTCCCACCTGGCACTTCCGTG	9	0	5	4	0	0	0	0	0.01	0.7782	1.0065	0.01	0.01	0.01	0.01
novel-m0081-5p	22	GAACATATTTTAGAAGACTTGG	8	0	8	0	0	0	0	0	0.01	1.2451	0.01	0.01	0.01	0.01	0.01
novel-m0008-5p	20	AGGTCCCTGTTTGGGCGCCA	8	0	0	0	0	0	0	8	0.01	0.01	0.01	0.01	0.01	0.01	1.6331
novel-m0038-5p	22	CTCCCCTTAAGGACTTCATATT	8	0	2	3	0	0	3	0	0.01	0.3113	0.7549	0.01	0.01	0.3767	0.01
novel-m0025-5p	20	AGGTCCCTGTTTGGGCGCCA	8	0	0	0	0	0	0	8	0.01	0.01	0.01	0.01	0.01	0.01	1.6331
novel-m0013-5p	22	AATGGGAGTGCTGGTTCAGTGG	8	0	0	0	4	4	0	0	0.01	0.01	0.01	0.4752	0.413	0.01	0.01
novel-m0132-3p	22	TTGGCATTACTGAGCATCGAGT	8	3	0	0	0	2	3	0	0.7176	0.01	0.01	0.01	0.2065	0.3767	0.01
novel-m0077-3p	20	TGCCTGGATTGGTGGCCAGA	8	0	0	0	0	0	0	8	0.01	0.01	0.01	0.01	0.01	0.01	1.6331
novel-m0016-5p	21	CTGATGCTCTGTGCAGGGCCC	7	0	2	0	3	2	0	0	0.01	0.3113	0.01	0.3564	0.2065	0.01	0.01
novel-m0104-3p	22	CGGCCCACCAGGACCCAGGCGG	7	0	2	0	5	0	0	0	0.01	0.3113	0.01	0.5941	0.01	0.01	0.01
novel-m0045-5p	20	AAGCGTCCTGTGGCGAAACT	7	0	4	3	0	0	0	0	0.01	0.6225	0.7549	0.01	0.01	0.01	0.01
novel-m0080-5p	21	CAGGTCCCTGTTCGGGTGCCA	7	0	0	0	0	0	7	0	0.01	0.01	0.01	0.01	0.01	0.8789	0.01
novel-m0003-3p	21	GCGTTTGTTGTATAGTGGTGA	7	0	0	0	0	0	0	7	0.01	0.01	0.01	0.01	0.01	0.01	1.4289
novel-m0113-3p	20	AGCTATGGCCGTCTGAGGCC	7	3	2	0	0	2	0	0	0.7176	0.3113	0.01	0.01	0.2065	0.01	0.01
novel-m0058-5p	23	TTGGCCTGATCCTGAGAACTCGG	7	3	0	2	0	0	2	0	0.7176	0.01	0.5033	0.01	0.01	0.2511	0.01
novel-m0120-5p	22	CCTCCCCAGCGACTCTGGCTTG	7	0	0	0	0	4	3	0	0.01	0.01	0.01	0.01	0.413	0.3767	0.01
novel-m0047-5p	22	TAGAGAAAGAGGGAAAGATACT	7	0	0	0	2	5	0	0	0.01	0.01	0.01	0.2376	0.5162	0.01	0.01
novel-m0091-3p	22	AAACCCCGAACGAAGGTCTTGG	7	0	4	0	3	0	0	0	0.01	0.6225	0.01	0.3564	0.01	0.01	0.01
novel-m0126-3p	23	TGCACCGAGGCCGTGCGCCCAGA	7	2	0	3	2	0	0	0	0.4784	0.01	0.7549	0.2376	0.01	0.01	0.01
